# Supplementary material for: The JCMT Plane Survey: early results from the ℓ = 30° field
Source: Oxford University Press journal article supplement (doi:10.1093/mnras/stv1833), 2015-09-17
Supplement: stv1833_Supplementary_Data.zip [file stv1833_Supplementary_Data.zip]

Table 2: The JPS  $\ell = 30^\circ$  preliminary compact source catalogue. The columns are as follows: (1) name derived from Galactic coordinates of the maximum intensity in the source; (2)-(3) Galactic coordinates of maximum intensity in the catalogue source; (4)-(5) Galactic coordinates of emission centroid; (6)-(8) semi-major and semi-minor size and source position angle measured anti-clockwise from Galactic north; (9) effective radius of source, i.e.,  $R_{\text{eff}} = \sqrt{(A/\pi)}$ , where  $A$  is the area of the source above the threshold; (10)-(13) peak and integrated flux densities and their associated uncertainties; (14) signal to noise ratio (SNR).

| Name            | $\ell_{\text{max}}$<br>( $^\circ$ ) | $b_{\text{max}}$<br>( $^\circ$ ) | $\ell$<br>( $^\circ$ ) | $b$<br>( $^\circ$ ) | $\sigma_{\text{maj}}$<br>( $''$ ) | $\sigma_{\text{min}}$<br>( $''$ ) | PA<br>( $^\circ$ ) | $R_{\text{eff}}$<br>( $''$ ) | $S_{\text{peak}}$<br>(Jy beam $^{-1}$ ) | $\Delta S_{\text{peak}}$ | $S_{\text{int}}$<br>(Jy) | $\Delta S_{\text{int}}$ | SNR   |
|-----------------|-------------------------------------|----------------------------------|------------------------|---------------------|-----------------------------------|-----------------------------------|--------------------|------------------------------|-----------------------------------------|--------------------------|--------------------------|-------------------------|-------|
| (1)             | (2)                                 | (3)                              | (4)                    | (5)                 | (6)                               | (7)                               | (8)                | (9)                          | (10)                                    | (11)                     | (12)                     | (13)                    | (14)  |
| G026.830−00.208 | 26.830                              | −0.208                           | 26.830                 | −0.206              | 7                                 | 6                                 | 259                | 16                           | 0.38                                    | 0.08                     | 0.64                     | 0.13                    | 5.6   |
| G026.865−00.276 | 26.865                              | −0.276                           | 26.867                 | −0.276              | 12                                | 11                                | 112                | 26                           | 0.36                                    | 0.06                     | 1.00                     | 0.17                    | 6.8   |
| G026.957−00.077 | 26.957                              | −0.077                           | 26.956                 | −0.076              | 10                                | 8                                 | 224                | 26                           | 0.77                                    | 0.08                     | 1.64                     | 0.17                    | 15.2  |
| G026.960−00.309 | 26.960                              | −0.309                           | 26.962                 | −0.308              | 14                                | 7                                 | 177                | 23                           | 0.20                                    | 0.04                     | 0.67                     | 0.14                    | 5.0   |
| G027.000−00.298 | 27.000                              | −0.298                           | 27.001                 | −0.297              | 24                                | 11                                | 167                | 38                           | 0.69                                    | 0.07                     | 1.89                     | 0.20                    | 15.1  |
| G027.011−00.040 | 27.011                              | −0.040                           | 27.012                 | −0.039              | 11                                | 11                                | 151                | 30                           | 0.47                                    | 0.06                     | 1.15                     | 0.14                    | 10.4  |
| G027.019−00.166 | 27.019                              | −0.166                           | 27.021                 | −0.167              | 13                                | 6                                 | 192                | 21                           | 0.20                                    | 0.04                     | 0.51                     | 0.11                    | 5.1   |
| G027.037−00.171 | 27.037                              | −0.171                           | 27.035                 | −0.165              | 22                                | 12                                | 269                | 31                           | 0.22                                    | 0.04                     | 0.98                     | 0.19                    | 5.6   |
| G027.066+00.013 | 27.066                              | +0.013                           | 27.078                 | 0.015               | 32                                | 16                                | 163                | 44                           | 0.25                                    | 0.05                     | 1.76                     | 0.35                    | 5.4   |
| G027.086−00.564 | 27.086                              | −0.564                           | 27.086                 | −0.563              | 9                                 | 8                                 | 149                | 22                           | 0.39                                    | 0.05                     | 0.92                     | 0.13                    | 8.7   |
| G027.100−00.559 | 27.100                              | −0.559                           | 27.098                 | −0.557              | 17                                | 8                                 | 186                | 30                           | 0.57                                    | 0.06                     | 1.48                     | 0.17                    | 12.9  |
| G027.173−00.008 | 27.173                              | −0.008                           | 27.173                 | −0.005              | 14                                | 10                                | 210                | 27                           | 0.27                                    | 0.05                     | 0.83                     | 0.14                    | 6.5   |
| G027.178−00.105 | 27.178                              | −0.105                           | 27.176                 | −0.105              | 12                                | 9                                 | 166                | 27                           | 0.43                                    | 0.06                     | 1.29                     | 0.17                    | 9.4   |
| G027.186−00.082 | 27.186                              | −0.082                           | 27.186                 | −0.079              | 29                                | 16                                | 268                | 55                           | 3.07                                    | 0.25                     | 6.19                     | 0.50                    | 67.8  |
| G027.187−00.148 | 27.187                              | −0.148                           | 27.187                 | −0.148              | 20                                | 11                                | 213                | 33                           | 0.23                                    | 0.05                     | 1.15                     | 0.23                    | 5.6   |
| G027.207−00.100 | 27.207                              | −0.100                           | 27.208                 | −0.098              | 16                                | 15                                | 214                | 35                           | 0.44                                    | 0.06                     | 2.09                     | 0.28                    | 9.6   |
| G027.221+00.136 | 27.221                              | 0.136                            | 27.221                 | 0.136               | 16                                | 8                                 | 188                | 30                           | 0.84                                    | 0.09                     | 1.70                     | 0.18                    | 14.3  |
| G027.248+00.108 | 27.248                              | 0.108                            | 27.245                 | 0.108               | 16                                | 14                                | 189                | 34                           | 0.53                                    | 0.07                     | 1.64                     | 0.21                    | 10.4  |
| G027.256+00.135 | 27.256                              | 0.135                            | 27.255                 | 0.136               | 10                                | 7                                 | 130                | 22                           | 0.68                                    | 0.08                     | 1.34                     | 0.15                    | 11.9  |
| G027.279+00.145 | 27.279                              | 0.145                            | 27.272                 | 0.147               | 30                                | 12                                | 193                | 46                           | 1.66                                    | 0.15                     | 6.06                     | 0.53                    | 28.5  |
| G027.281+00.162 | 27.281                              | 0.162                            | 27.281                 | 0.163               | 7                                 | 6                                 | 200                | 16                           | 0.34                                    | 0.07                     | 0.64                     | 0.14                    | 5.0   |
| G027.286+00.150 | 27.286                              | 0.150                            | 27.286                 | 0.151               | 13                                | 10                                | 117                | 29                           | 1.59                                    | 0.14                     | 4.52                     | 0.40                    | 26.5  |
| G027.296+00.153 | 27.296                              | 0.153                            | 27.296                 | 0.155               | 16                                | 8                                 | 238                | 28                           | 0.76                                    | 0.09                     | 2.58                     | 0.29                    | 12.3  |
| G027.296−00.155 | 27.296                              | −0.155                           | 27.296                 | −0.152              | 15                                | 10                                | 119                | 29                           | 0.39                                    | 0.05                     | 1.20                     | 0.17                    | 8.8   |
| G027.315+00.176 | 27.315                              | 0.176                            | 27.315                 | 0.176               | 13                                | 8                                 | 173                | 29                           | 1.11                                    | 0.11                     | 2.36                     | 0.23                    | 17.0  |
| G027.319−00.339 | 27.319                              | −0.339                           | 27.320                 | −0.337              | 9                                 | 6                                 | 169                | 18                           | 0.22                                    | 0.05                     | 0.49                     | 0.10                    | 5.2   |
| G027.320+00.166 | 27.320                              | 0.166                            | 27.320                 | 0.167               | 10                                | 5                                 | 141                | 17                           | 0.34                                    | 0.07                     | 0.65                     | 0.13                    | 5.5   |
| G027.341+00.020 | 27.341                              | 0.020                            | 27.337                 | 0.018               | 17                                | 10                                | 129                | 30                           | 0.37                                    | 0.05                     | 1.33                     | 0.18                    | 8.9   |
| G027.343+00.160 | 27.343                              | 0.160                            | 27.340                 | 0.164               | 24                                | 17                                | 153                | 33                           | 0.32                                    | 0.05                     | 1.31                     | 0.22                    | 6.6   |
| G027.343−00.331 | 27.343                              | −0.331                           | 27.343                 | −0.331              | 8                                 | 5                                 | 158                | 17                           | 0.27                                    | 0.05                     | 0.47                     | 0.09                    | 6.0   |
| G027.346+00.026 | 27.346                              | 0.026                            | 27.345                 | 0.027               | 9                                 | 7                                 | 184                | 23                           | 0.63                                    | 0.07                     | 1.13                     | 0.12                    | 14.4  |
| G027.366−00.167 | 27.366                              | −0.167                           | 27.365                 | −0.165              | 23                                | 16                                | 229                | 68                           | 10.73                                   | 0.86                     | 21.50                    | 1.72                    | 214.5 |
| G027.409+00.040 | 27.409                              | 0.040                            | 27.406                 | 0.038               | 16                                | 12                                | 169                | 31                           | 0.21                                    | 0.04                     | 0.81                     | 0.15                    | 5.9   |
| G027.435+00.101 | 27.435                              | 0.101                            | 27.436                 | 0.100               | 26                                | 15                                | 172                | 42                           | 0.27                                    | 0.04                     | 1.90                     | 0.28                    | 8.2   |
| G027.439+00.083 | 27.439                              | 0.083                            | 27.437                 | 0.083               | 13                                | 9                                 | 211                | 23                           | 0.21                                    | 0.04                     | 0.60                     | 0.11                    | 6.3   |
| G027.461−00.150 | 27.461                              | −0.150                           | 27.463                 | −0.152              | 19                                | 17                                | 228                | 34                           | 0.21                                    | 0.04                     | 0.96                     | 0.20                    | 5.1   |
| G027.464+00.118 | 27.464                              | 0.118                            | 27.463                 | 0.116               | 18                                | 16                                | 144                | 42                           | 0.63                                    | 0.06                     | 3.46                     | 0.34                    | 18.1  |
| G027.479+00.127 | 27.479                              | 0.127                            | 27.478                 | 0.131               | 23                                | 16                                | 132                | 49                           | 0.75                                    | 0.07                     | 5.00                     | 0.46                    | 21.5  |
| G027.490−00.888 | 27.490                              | −0.888                           | 27.490                 | −0.886              | 17                                | 11                                | 227                | 31                           | 0.24                                    | 0.05                     | 1.17                     | 0.24                    | 5.4   |
| G027.493+00.189 | 27.493                              | 0.189                            | 27.493                 | 0.190               | 20                                | 10                                | 210                | 37                           | 1.16                                    | 0.10                     | 3.77                     | 0.33                    | 29.9  |
| G027.499+00.213 | 27.499                              | 0.213                            | 27.496                 | 0.210               | 25                                | 9                                 | 121                | 33                           | 0.33                                    | 0.05                     | 1.39                     | 0.20                    | 8.3   |
| G027.502−00.294 | 27.502                              | −0.294                           | 27.502                 | −0.293              | 8                                 | 6                                 | 239                | 18                           | 0.26                                    | 0.05                     | 0.42                     | 0.08                    | 6.0   |
| G027.503+00.196 | 27.503                              | 0.196                            | 27.504                 | 0.196               | 13                                | 12                                | 199                | 32                           | 0.59                                    | 0.06                     | 2.03                     | 0.21                    | 15.4  |
| G027.513+00.073 | 27.513                              | 0.073                            | 27.511                 | 0.074               | 20                                | 12                                | 104                | 33                           | 0.20                                    | 0.04                     | 0.83                     | 0.15                    | 6.4   |
| G027.552−00.934 | 27.552                              | −0.934                           | 27.551                 | −0.936              | 12                                | 9                                 | 111                | 28                           | 0.59                                    | 0.06                     | 1.29                     | 0.14                    | 14.3  |
| G027.563+00.077 | 27.563                              | 0.077                            | 27.558                 | 0.079               | 26                                | 14                                | 207                | 49                           | 1.28                                    | 0.11                     | 5.92                     | 0.50                    | 36.1  |
| G027.564+00.086 | 27.564                              | 0.086                            | 27.565                 | 0.086               | 15                                | 11                                | 209                | 36                           | 1.98                                    | 0.16                     | 4.27                     | 0.35                    | 56.8  |
| G027.574+00.032 | 27.574                              | 0.032                            | 27.573                 | 0.032               | 17                                | 12                                | 170                | 32                           | 0.24                                    | 0.04                     | 1.05                     | 0.16                    | 7.5   |
| G027.590+00.020 | 27.590                              | 0.020                            | 27.590                 | 0.021               | 11                                | 9                                 | 133                | 22                           | 0.17                                    | 0.03                     | 0.44                     | 0.08                    | 5.9   |
| G027.600+00.118 | 27.600                              | 0.118                            | 27.599                 | 0.119               | 9                                 | 8                                 | 201                | 24                           | 0.38                                    | 0.05                     | 0.71                     | 0.09                    | 10.7  |
| G027.609+00.027 | 27.609                              | 0.027                            | 27.606                 | 0.025               | 17                                | 14                                | 132                | 34                           | 0.26                                    | 0.04                     | 0.95                     | 0.14                    | 8.5   |

Table 2: Cont.

| Name            | $\ell_{\max}$<br>( $^{\circ}$ ) | $b_{\max}$<br>( $^{\circ}$ ) | $\ell$<br>( $^{\circ}$ ) | $b$<br>( $^{\circ}$ ) | $\sigma_{\text{maj}}$<br>( $''$ ) | $\sigma_{\text{min}}$<br>( $''$ ) | PA<br>( $^{\circ}$ ) | $R_{\text{eff}}$<br>( $''$ ) | $S_{\text{peak}}$<br>(Jy beam $^{-1}$ ) | $\Delta S_{\text{peak}}$ | $S_{\text{int}}$<br>(Jy) | $\Delta S_{\text{int}}$ | SNR   |
|-----------------|---------------------------------|------------------------------|--------------------------|-----------------------|-----------------------------------|-----------------------------------|----------------------|------------------------------|-----------------------------------------|--------------------------|--------------------------|-------------------------|-------|
| (1)             | (2)                             | (3)                          | (4)                      | (5)                   | (6)                               | (7)                               | (8)                  | (9)                          | (10)                                    | (11)                     | (12)                     | (13)                    | (14)  |
| G027.615−00.862 | 27.615                          | −0.862                       | 27.615                   | −0.862                | 10                                | 7                                 | 96                   | 20                           | 0.27                                    | 0.05                     | 0.63                     | 0.11                    | 6.5   |
| G027.620−00.871 | 27.620                          | −0.871                       | 27.619                   | −0.872                | 12                                | 8                                 | 127                  | 24                           | 0.28                                    | 0.05                     | 0.97                     | 0.16                    | 6.8   |
| G027.633+00.073 | 27.633                          | 0.073                        | 27.631                   | 0.075                 | 17                                | 11                                | 222                  | 30                           | 0.20                                    | 0.04                     | 0.73                     | 0.13                    | 6.1   |
| G027.656+00.098 | 27.656                          | 0.098                        | 27.653                   | 0.098                 | 15                                | 11                                | 176                  | 27                           | 0.24                                    | 0.04                     | 0.81                     | 0.13                    | 7.3   |
| G027.662+00.115 | 27.662                          | 0.115                        | 27.662                   | 0.115                 | 10                                | 6                                 | 192                  | 19                           | 0.19                                    | 0.04                     | 0.49                     | 0.09                    | 5.6   |
| G027.684+00.097 | 27.684                          | 0.097                        | 27.683                   | 0.098                 | 33                                | 18                                | 246                  | 54                           | 0.33                                    | 0.04                     | 3.16                     | 0.42                    | 9.5   |
| G027.713−00.121 | 27.713                          | −0.121                       | 27.714                   | −0.119                | 19                                | 10                                | 268                  | 29                           | 0.19                                    | 0.04                     | 0.68                     | 0.14                    | 5.4   |
| G027.740−00.232 | 27.740                          | −0.232                       | 27.740                   | −0.232                | 9                                 | 8                                 | 170                  | 23                           | 0.30                                    | 0.05                     | 0.71                     | 0.12                    | 6.7   |
| G027.742+00.171 | 27.742                          | 0.171                        | 27.741                   | 0.174                 | 10                                | 10                                | 202                  | 25                           | 0.47                                    | 0.06                     | 1.14                     | 0.14                    | 10.3  |
| G027.744+00.115 | 27.744                          | 0.115                        | 27.744                   | 0.115                 | 25                                | 11                                | 116                  | 38                           | 0.37                                    | 0.05                     | 1.41                     | 0.19                    | 9.0   |
| G027.757+00.050 | 27.757                          | 0.050                        | 27.756                   | 0.056                 | 39                                | 20                                | 244                  | 57                           | 1.26                                    | 0.11                     | 4.68                     | 0.40                    | 35.2  |
| G027.782−00.259 | 27.782                          | −0.259                       | 27.784                   | −0.256                | 32                                | 12                                | 166                  | 42                           | 1.48                                    | 0.13                     | 3.18                     | 0.27                    | 32.6  |
| G027.783+00.056 | 27.783                          | 0.056                        | 27.784                   | 0.061                 | 27                                | 14                                | 96                   | 51                           | 1.36                                    | 0.11                     | 5.20                     | 0.44                    | 36.2  |
| G027.788+00.249 | 27.788                          | 0.249                        | 27.787                   | 0.249                 | 8                                 | 6                                 | 241                  | 18                           | 0.25                                    | 0.05                     | 0.48                     | 0.10                    | 5.2   |
| G027.795−00.278 | 27.795                          | −0.278                       | 27.795                   | −0.276                | 18                                | 14                                | 247                  | 40                           | 0.94                                    | 0.09                     | 3.04                     | 0.28                    | 20.7  |
| G027.798+00.150 | 27.798                          | 0.150                        | 27.797                   | 0.151                 | 14                                | 7                                 | 91                   | 23                           | 0.22                                    | 0.05                     | 0.63                     | 0.14                    | 5.0   |
| G027.807−00.183 | 27.807                          | −0.183                       | 27.806                   | −0.182                | 12                                | 6                                 | 105                  | 24                           | 0.46                                    | 0.05                     | 0.75                     | 0.09                    | 11.7  |
| G027.832−00.338 | 27.832                          | −0.338                       | 27.829                   | −0.337                | 10                                | 8                                 | 220                  | 22                           | 0.18                                    | 0.04                     | 0.51                     | 0.10                    | 5.3   |
| G027.870−00.235 | 27.870                          | −0.235                       | 27.870                   | −0.234                | 8                                 | 6                                 | 253                  | 18                           | 0.19                                    | 0.04                     | 0.40                     | 0.08                    | 5.5   |
| G027.890−00.583 | 27.890                          | −0.583                       | 27.892                   | −0.580                | 14                                | 8                                 | 121                  | 25                           | 0.16                                    | 0.03                     | 0.52                     | 0.10                    | 5.6   |
| G027.902−00.014 | 27.902                          | −0.014                       | 27.902                   | −0.013                | 19                                | 15                                | 124                  | 47                           | 1.07                                    | 0.09                     | 4.26                     | 0.38                    | 25.7  |
| G027.921−00.030 | 27.921                          | −0.030                       | 27.919                   | −0.033                | 21                                | 8                                 | 97                   | 28                           | 0.26                                    | 0.04                     | 0.75                     | 0.13                    | 6.8   |
| G027.924+00.195 | 27.924                          | 0.195                        | 27.922                   | 0.197                 | 19                                | 9                                 | 201                  | 30                           | 0.40                                    | 0.05                     | 1.30                     | 0.18                    | 9.0   |
| G027.936+00.206 | 27.936                          | 0.206                        | 27.933                   | 0.207                 | 19                                | 11                                | 201                  | 39                           | 1.37                                    | 0.12                     | 3.49                     | 0.30                    | 29.3  |
| G027.957+00.115 | 27.957                          | 0.115                        | 27.958                   | 0.117                 | 17                                | 10                                | 140                  | 31                           | 0.38                                    | 0.05                     | 1.11                     | 0.16                    | 8.5   |
| G027.958−00.553 | 27.958                          | −0.553                       | 27.957                   | −0.553                | 16                                | 12                                | 254                  | 39                           | 0.76                                    | 0.07                     | 1.56                     | 0.14                    | 24.9  |
| G027.968−00.474 | 27.968                          | −0.474                       | 27.967                   | −0.472                | 23                                | 14                                | 181                  | 43                           | 0.62                                    | 0.06                     | 2.19                     | 0.21                    | 19.7  |
| G027.973−00.422 | 27.973                          | −0.422                       | 27.973                   | −0.420                | 13                                | 12                                | 218                  | 36                           | 0.76                                    | 0.07                     | 1.85                     | 0.17                    | 23.4  |
| G027.978+00.078 | 27.978                          | 0.078                        | 27.975                   | 0.080                 | 25                                | 13                                | 253                  | 48                           | 1.12                                    | 0.10                     | 4.71                     | 0.43                    | 23.2  |
| G027.979−00.430 | 27.979                          | −0.430                       | 27.978                   | −0.431                | 14                                | 9                                 | 132                  | 27                           | 0.32                                    | 0.04                     | 1.04                     | 0.13                    | 10.1  |
| G027.989+00.283 | 27.989                          | 0.283                        | 27.990                   | 0.281                 | 21                                | 11                                | 246                  | 32                           | 0.34                                    | 0.05                     | 1.32                     | 0.20                    | 7.7   |
| G028.002+00.155 | 28.002                          | 0.155                        | 27.995                   | 0.156                 | 20                                | 12                                | 157                  | 34                           | 0.24                                    | 0.05                     | 1.22                     | 0.26                    | 5.1   |
| G028.011−00.057 | 28.011                          | −0.057                       | 28.007                   | −0.055                | 16                                | 11                                | 196                  | 33                           | 0.39                                    | 0.05                     | 1.47                     | 0.18                    | 10.5  |
| G028.011−00.427 | 28.011                          | −0.427                       | 28.010                   | −0.427                | 10                                | 8                                 | 151                  | 25                           | 0.63                                    | 0.06                     | 1.08                     | 0.11                    | 17.8  |
| G028.033−00.064 | 28.033                          | −0.064                       | 28.033                   | −0.065                | 17                                | 14                                | 145                  | 36                           | 0.27                                    | 0.04                     | 1.14                     | 0.17                    | 7.9   |
| G028.045−00.117 | 28.045                          | −0.117                       | 28.044                   | −0.121                | 23                                | 18                                | 126                  | 45                           | 0.31                                    | 0.04                     | 2.29                     | 0.32                    | 8.8   |
| G028.048−00.457 | 28.048                          | −0.457                       | 28.047                   | −0.458                | 13                                | 12                                | 95                   | 34                           | 0.62                                    | 0.06                     | 1.71                     | 0.17                    | 17.9  |
| G028.054−00.005 | 28.054                          | −0.005                       | 28.052                   | −0.002                | 19                                | 9                                 | 206                  | 31                           | 0.23                                    | 0.04                     | 1.04                     | 0.19                    | 6.3   |
| G028.063−00.125 | 28.063                          | −0.125                       | 28.061                   | −0.125                | 11                                | 7                                 | 151                  | 21                           | 0.17                                    | 0.04                     | 0.52                     | 0.11                    | 5.2   |
| G028.074+00.117 | 28.074                          | 0.117                        | 28.076                   | 0.116                 | 11                                | 7                                 | 209                  | 21                           | 0.22                                    | 0.05                     | 0.61                     | 0.13                    | 5.2   |
| G028.089+00.070 | 28.089                          | 0.070                        | 28.087                   | 0.070                 | 15                                | 10                                | 190                  | 29                           | 0.31                                    | 0.05                     | 1.07                     | 0.17                    | 7.3   |
| G028.097−00.055 | 28.097                          | −0.055                       | 28.097                   | −0.053                | 19                                | 13                                | 147                  | 34                           | 0.21                                    | 0.04                     | 0.91                     | 0.16                    | 6.4   |
| G028.111−00.451 | 28.111                          | −0.451                       | 28.109                   | −0.447                | 13                                | 12                                | 231                  | 30                           | 0.22                                    | 0.04                     | 1.05                     | 0.20                    | 5.8   |
| G028.143+00.321 | 28.143                          | 0.321                        | 28.139                   | 0.324                 | 34                                | 15                                | 211                  | 48                           | 0.37                                    | 0.05                     | 2.94                     | 0.43                    | 8.2   |
| G028.148−00.004 | 28.148                          | −0.004                       | 28.147                   | −0.005                | 14                                | 14                                | 102                  | 43                           | 1.73                                    | 0.14                     | 4.16                     | 0.34                    | 50.5  |
| G028.150+00.169 | 28.150                          | 0.169                        | 28.151                   | 0.171                 | 13                                | 10                                | 117                  | 33                           | 0.79                                    | 0.08                     | 2.01                     | 0.20                    | 16.3  |
| G028.151+00.011 | 28.151                          | 0.011                        | 28.149                   | 0.012                 | 10                                | 8                                 | 251                  | 21                           | 0.18                                    | 0.03                     | 0.46                     | 0.09                    | 6.0   |
| G028.161−00.019 | 28.161                          | −0.019                       | 28.159                   | −0.021                | 16                                | 12                                | 114                  | 31                           | 0.25                                    | 0.04                     | 1.11                     | 0.17                    | 7.5   |
| G028.183−00.090 | 28.183                          | −0.090                       | 28.182                   | −0.090                | 14                                | 7                                 | 145                  | 23                           | 0.23                                    | 0.04                     | 0.71                     | 0.12                    | 6.9   |
| G028.195−00.073 | 28.195                          | −0.073                       | 28.195                   | −0.074                | 19                                | 12                                | 91                   | 38                           | 0.64                                    | 0.06                     | 2.80                     | 0.27                    | 19.5  |
| G028.201−00.050 | 28.201                          | −0.050                       | 28.201                   | −0.049                | 22                                | 19                                | 139                  | 71                           | 8.18                                    | 0.66                     | 19.24                    | 1.54                    | 238.4 |
| G028.219−00.083 | 28.219                          | −0.083                       | 28.219                   | −0.086                | 22                                | 7                                 | 251                  | 24                           | 0.14                                    | 0.03                     | 0.48                     | 0.10                    | 5.2   |
| G028.227+00.359 | 28.227                          | 0.359                        | 28.223                   | 0.361                 | 21                                | 9                                 | 187                  | 27                           | 0.27                                    | 0.05                     | 0.72                     | 0.13                    | 6.0   |
| G028.231+00.003 | 28.231                          | 0.003                        | 28.230                   | 0.006                 | 23                                | 12                                | 214                  | 40                           | 0.41                                    | 0.05                     | 2.03                     | 0.24                    | 11.4  |
| G028.233+00.040 | 28.233                          | 0.040                        | 28.232                   | 0.041                 | 12                                | 10                                | 267                  | 29                           | 0.87                                    | 0.08                     | 1.93                     | 0.17                    | 26.2  |
| G028.241+00.063 | 28.241                          | 0.063                        | 28.241                   | 0.061                 | 34                                | 23                                | 113                  | 67                           | 0.43                                    | 0.04                     | 6.09                     | 0.63                    | 15.1  |

Table 2: Cont.

| Name            | $\ell_{\max}$<br>( $^{\circ}$ ) | $b_{\max}$<br>( $^{\circ}$ ) | $\ell$<br>( $^{\circ}$ ) | $b$<br>( $^{\circ}$ ) | $\sigma_{\text{maj}}$<br>( $''$ ) | $\sigma_{\text{min}}$<br>( $''$ ) | PA<br>( $^{\circ}$ ) | $R_{\text{eff}}$<br>( $''$ ) | $S_{\text{peak}}$<br>(Jy beam $^{-1}$ ) | $\Delta S_{\text{peak}}$ | $S_{\text{int}}$<br>(Jy) | $\Delta S_{\text{int}}$ | SNR   |
|-----------------|---------------------------------|------------------------------|--------------------------|-----------------------|-----------------------------------|-----------------------------------|----------------------|------------------------------|-----------------------------------------|--------------------------|--------------------------|-------------------------|-------|
| (1)             | (2)                             | (3)                          | (4)                      | (5)                   | (6)                               | (7)                               | (8)                  | (9)                          | (10)                                    | (11)                     | (12)                     | (13)                    | (14)  |
| G028.243+00.011 | 28.243                          | 0.011                        | 28.246                   | 0.013                 | 22                                | 15                                | 139                  | 45                           | 0.64                                    | 0.06                     | 3.35                     | 0.33                    | 18.1  |
| G028.254+00.083 | 28.254                          | 0.083                        | 28.255                   | 0.084                 | 13                                | 5                                 | 196                  | 19                           | 0.15                                    | 0.03                     | 0.41                     | 0.08                    | 5.8   |
| G028.273−00.167 | 28.273                          | −0.167                       | 28.273                   | −0.165                | 29                                | 12                                | 108                  | 48                           | 0.73                                    | 0.07                     | 4.69                     | 0.45                    | 18.3  |
| G028.283−00.155 | 28.283                          | −0.155                       | 28.285                   | −0.150                | 18                                | 15                                | 115                  | 38                           | 0.45                                    | 0.05                     | 2.24                     | 0.27                    | 11.2  |
| G028.289+00.183 | 28.289                          | 0.183                        | 28.287                   | 0.183                 | 8                                 | 7                                 | 209                  | 18                           | 0.21                                    | 0.04                     | 0.37                     | 0.07                    | 5.7   |
| G028.290−00.008 | 28.290                          | −0.008                       | 28.289                   | −0.007                | 7                                 | 6                                 | 261                  | 17                           | 0.34                                    | 0.04                     | 0.53                     | 0.07                    | 10.1  |
| G028.290−00.363 | 28.290                          | −0.363                       | 28.287                   | −0.360                | 30                                | 24                                | 266                  | 72                           | 2.11                                    | 0.17                     | 15.70                    | 1.29                    | 53.5  |
| G028.292+00.007 | 28.292                          | 0.007                        | 28.292                   | 0.007                 | 21                                | 12                                | 219                  | 41                           | 0.84                                    | 0.08                     | 2.91                     | 0.26                    | 24.6  |
| G028.298−00.192 | 28.298                          | −0.192                       | 28.297                   | −0.190                | 21                                | 10                                | 127                  | 32                           | 0.22                                    | 0.04                     | 1.03                     | 0.21                    | 5.5   |
| G028.302−00.383 | 28.302                          | −0.383                       | 28.304                   | −0.385                | 19                                | 13                                | 222                  | 41                           | 1.30                                    | 0.11                     | 5.52                     | 0.47                    | 33.6  |
| G028.308−00.420 | 28.308                          | −0.420                       | 28.308                   | −0.419                | 9                                 | 8                                 | 125                  | 20                           | 0.20                                    | 0.04                     | 0.54                     | 0.11                    | 5.4   |
| G028.312−00.398 | 28.312                          | −0.398                       | 28.311                   | −0.398                | 19                                | 16                                | 152                  | 40                           | 0.71                                    | 0.07                     | 3.50                     | 0.34                    | 18.7  |
| G028.314−00.307 | 28.314                          | −0.307                       | 28.317                   | −0.305                | 17                                | 8                                 | 163                  | 28                           | 0.27                                    | 0.05                     | 0.86                     | 0.15                    | 6.6   |
| G028.318−00.032 | 28.318                          | −0.032                       | 28.315                   | −0.033                | 26                                | 11                                | 140                  | 36                           | 0.38                                    | 0.04                     | 1.61                     | 0.18                    | 12.4  |
| G028.322−00.011 | 28.322                          | −0.011                       | 28.322                   | −0.011                | 18                                | 17                                | 129                  | 46                           | 1.48                                    | 0.12                     | 4.49                     | 0.37                    | 41.7  |
| G028.323+00.068 | 28.323                          | 0.068                        | 28.324                   | 0.068                 | 21                                | 14                                | 211                  | 44                           | 0.64                                    | 0.06                     | 3.43                     | 0.33                    | 19.1  |
| G028.325+00.161 | 28.325                          | 0.161                        | 28.325                   | 0.162                 | 13                                | 8                                 | 118                  | 29                           | 0.87                                    | 0.08                     | 1.40                     | 0.13                    | 23.4  |
| G028.325−00.040 | 28.325                          | −0.040                       | 28.323                   | −0.041                | 18                                | 11                                | 139                  | 32                           | 0.55                                    | 0.06                     | 1.76                     | 0.18                    | 16.0  |
| G028.328+00.015 | 28.328                          | 0.015                        | 28.326                   | 0.016                 | 13                                | 9                                 | 161                  | 24                           | 0.22                                    | 0.04                     | 0.80                     | 0.14                    | 6.2   |
| G028.333−00.034 | 28.333                          | −0.034                       | 28.333                   | −0.035                | 19                                | 13                                | 234                  | 37                           | 0.57                                    | 0.06                     | 2.47                     | 0.25                    | 16.5  |
| G028.337+00.118 | 28.337                          | 0.118                        | 28.336                   | 0.116                 | 22                                | 13                                | 258                  | 47                           | 1.50                                    | 0.12                     | 4.70                     | 0.39                    | 45.6  |
| G028.342+00.142 | 28.342                          | 0.142                        | 28.341                   | 0.144                 | 12                                | 7                                 | 161                  | 26                           | 0.41                                    | 0.05                     | 0.85                     | 0.10                    | 11.4  |
| G028.344+00.060 | 28.344                          | 0.060                        | 28.343                   | 0.059                 | 17                                | 15                                | 140                  | 40                           | 1.12                                    | 0.10                     | 4.18                     | 0.36                    | 33.2  |
| G028.353+00.101 | 28.353                          | 0.101                        | 28.352                   | 0.100                 | 20                                | 13                                | 269                  | 36                           | 0.33                                    | 0.04                     | 1.50                     | 0.19                    | 9.9   |
| G028.354+00.072 | 28.354                          | 0.072                        | 28.356                   | 0.073                 | 15                                | 12                                | 163                  | 35                           | 0.79                                    | 0.07                     | 2.82                     | 0.25                    | 24.2  |
| G028.358+00.201 | 28.358                          | 0.201                        | 28.355                   | 0.201                 | 16                                | 7                                 | 165                  | 25                           | 0.31                                    | 0.04                     | 0.84                     | 0.12                    | 8.8   |
| G028.362+00.052 | 28.362                          | 0.052                        | 28.362                   | 0.055                 | 20                                | 14                                | 218                  | 42                           | 0.70                                    | 0.07                     | 3.97                     | 0.37                    | 19.9  |
| G028.365+00.120 | 28.365                          | 0.120                        | 28.368                   | 0.123                 | 20                                | 12                                | 95                   | 34                           | 0.37                                    | 0.05                     | 1.59                     | 0.20                    | 10.1  |
| G028.367+00.082 | 28.367                          | 0.082                        | 28.366                   | 0.083                 | 10                                | 7                                 | 248                  | 21                           | 0.24                                    | 0.04                     | 0.64                     | 0.10                    | 7.9   |
| G028.375+00.052 | 28.375                          | 0.052                        | 28.377                   | 0.055                 | 16                                | 11                                | 141                  | 30                           | 0.42                                    | 0.05                     | 1.86                     | 0.21                    | 12.2  |
| G028.387+00.450 | 28.387                          | 0.450                        | 28.382                   | 0.452                 | 28                                | 9                                 | 196                  | 32                           | 0.40                                    | 0.05                     | 0.96                     | 0.11                    | 12.3  |
| G028.388+00.037 | 28.388                          | 0.037                        | 28.389                   | 0.036                 | 20                                | 9                                 | 230                  | 32                           | 0.32                                    | 0.05                     | 1.27                     | 0.18                    | 8.5   |
| G028.388+00.061 | 28.388                          | 0.061                        | 28.387                   | 0.063                 | 10                                | 8                                 | 221                  | 21                           | 0.45                                    | 0.05                     | 1.10                     | 0.12                    | 13.1  |
| G028.394+00.195 | 28.394                          | 0.195                        | 28.393                   | 0.200                 | 18                                | 9                                 | 265                  | 28                           | 0.16                                    | 0.03                     | 0.64                     | 0.13                    | 5.6   |
| G028.398+00.080 | 28.398                          | 0.080                        | 28.397                   | 0.079                 | 23                                | 20                                | 237                  | 66                           | 4.89                                    | 0.39                     | 16.97                    | 1.36                    | 126.2 |
| G028.399+00.450 | 28.399                          | 0.450                        | 28.398                   | 0.451                 | 8                                 | 7                                 | 248                  | 20                           | 0.28                                    | 0.04                     | 0.52                     | 0.07                    | 9.0   |
| G028.402+00.208 | 28.402                          | 0.208                        | 28.402                   | 0.208                 | 12                                | 7                                 | 121                  | 22                           | 0.18                                    | 0.03                     | 0.47                     | 0.08                    | 6.2   |
| G028.409−00.439 | 28.409                          | −0.439                       | 28.405                   | −0.435                | 18                                | 11                                | 209                  | 32                           | 0.32                                    | 0.05                     | 1.14                     | 0.16                    | 8.4   |
| G028.415−00.008 | 28.415                          | −0.008                       | 28.415                   | −0.007                | 24                                | 14                                | 171                  | 43                           | 0.47                                    | 0.05                     | 3.04                     | 0.35                    | 12.2  |
| G028.418+00.206 | 28.418                          | 0.206                        | 28.413                   | 0.205                 | 22                                | 10                                | 134                  | 29                           | 0.24                                    | 0.04                     | 0.69                     | 0.10                    | 8.0   |
| G028.420+00.139 | 28.420                          | 0.139                        | 28.418                   | 0.140                 | 14                                | 11                                | 248                  | 29                           | 0.32                                    | 0.04                     | 0.99                     | 0.13                    | 9.9   |
| G028.421+00.239 | 28.421                          | 0.239                        | 28.417                   | 0.236                 | 24                                | 10                                | 132                  | 34                           | 0.16                                    | 0.03                     | 0.89                     | 0.18                    | 5.2   |
| G028.432−00.128 | 28.432                          | −0.128                       | 28.433                   | −0.127                | 34                                | 17                                | 209                  | 41                           | 0.35                                    | 0.05                     | 1.63                     | 0.22                    | 9.1   |
| G028.439+00.035 | 28.439                          | 0.035                        | 28.435                   | 0.035                 | 17                                | 9                                 | 181                  | 31                           | 0.49                                    | 0.06                     | 1.08                     | 0.12                    | 12.3  |
| G028.445+00.192 | 28.445                          | 0.192                        | 28.444                   | 0.193                 | 9                                 | 8                                 | 154                  | 20                           | 0.25                                    | 0.04                     | 0.54                     | 0.08                    | 7.9   |
| G028.448−00.330 | 28.448                          | −0.330                       | 28.446                   | −0.325                | 30                                | 10                                | 252                  | 36                           | 0.22                                    | 0.04                     | 1.01                     | 0.18                    | 6.1   |
| G028.450+00.179 | 28.450                          | 0.179                        | 28.449                   | 0.179                 | 34                                | 11                                | 185                  | 41                           | 0.28                                    | 0.04                     | 1.60                     | 0.22                    | 8.9   |
| G028.452+00.002 | 28.452                          | 0.002                        | 28.446                   | −0.001                | 31                                | 11                                | 155                  | 42                           | 0.77                                    | 0.07                     | 3.42                     | 0.33                    | 18.6  |
| G028.461+00.010 | 28.461                          | 0.010                        | 28.459                   | 0.012                 | 11                                | 8                                 | 176                  | 22                           | 0.28                                    | 0.05                     | 0.68                     | 0.11                    | 6.9   |
| G028.468+00.196 | 28.468                          | 0.196                        | 28.460                   | 0.192                 | 27                                | 10                                | 160                  | 38                           | 0.38                                    | 0.04                     | 2.35                     | 0.27                    | 12.0  |
| G028.471−00.282 | 28.471                          | −0.282                       | 28.471                   | −0.282                | 14                                | 9                                 | 230                  | 29                           | 0.36                                    | 0.05                     | 1.04                     | 0.14                    | 9.4   |
| G028.481+00.193 | 28.481                          | 0.193                        | 28.480                   | 0.194                 | 7                                 | 4                                 | 193                  | 14                           | 0.15                                    | 0.03                     | 0.27                     | 0.05                    | 5.5   |
| G028.498+00.225 | 28.498                          | 0.225                        | 28.500                   | 0.225                 | 18                                | 9                                 | 155                  | 28                           | 0.25                                    | 0.04                     | 0.85                     | 0.13                    | 7.9   |
| G028.501+00.172 | 28.501                          | 0.172                        | 28.498                   | 0.171                 | 17                                | 15                                | 109                  | 36                           | 0.25                                    | 0.04                     | 1.09                     | 0.16                    | 8.3   |
| G028.502+00.290 | 28.502                          | 0.290                        | 28.503                   | 0.294                 | 23                                | 13                                | 132                  | 38                           | 0.28                                    | 0.04                     | 1.01                     | 0.14                    | 8.7   |
| G028.510+00.243 | 28.510                          | 0.243                        | 28.512                   | 0.245                 | 14                                | 10                                | 185                  | 27                           | 0.27                                    | 0.04                     | 0.63                     | 0.09                    | 7.9   |

Table 2: Cont.

| Name            | $\ell_{\max}$<br>( $^{\circ}$ ) | $b_{\max}$<br>( $^{\circ}$ ) | $\ell$<br>( $^{\circ}$ ) | $b$<br>( $^{\circ}$ ) | $\sigma_{\text{maj}}$<br>( $''$ ) | $\sigma_{\text{min}}$<br>( $''$ ) | PA<br>( $^{\circ}$ ) | $R_{\text{eff}}$<br>( $''$ ) | $S_{\text{peak}}$<br>(Jy beam $^{-1}$ ) | $\Delta S_{\text{peak}}$ | $S_{\text{int}}$<br>(Jy) | $\Delta S_{\text{int}}$ | SNR  |
|-----------------|---------------------------------|------------------------------|--------------------------|-----------------------|-----------------------------------|-----------------------------------|----------------------|------------------------------|-----------------------------------------|--------------------------|--------------------------|-------------------------|------|
| (1)             | (2)                             | (3)                          | (4)                      | (5)                   | (6)                               | (7)                               | (8)                  | (9)                          | (10)                                    | (11)                     | (12)                     | (13)                    | (14) |
| G028.522+00.120 | 28.522                          | 0.120                        | 28.511                   | 0.112                 | 51                                | 12                                | 138                  | 38                           | 0.14                                    | 0.03                     | 0.92                     | 0.18                    | 5.6  |
| G028.527−00.251 | 28.527                          | −0.251                       | 28.525                   | −0.251                | 17                                | 8                                 | 149                  | 31                           | 0.57                                    | 0.06                     | 1.38                     | 0.14                    | 14.8 |
| G028.533+00.128 | 28.533                          | 0.128                        | 28.529                   | 0.129                 | 18                                | 7                                 | 174                  | 25                           | 0.24                                    | 0.03                     | 0.57                     | 0.08                    | 8.3  |
| G028.538−00.279 | 28.538                          | −0.279                       | 28.536                   | −0.281                | 16                                | 10                                | 116                  | 30                           | 0.49                                    | 0.06                     | 1.78                     | 0.20                    | 12.3 |
| G028.540+00.095 | 28.540                          | 0.095                        | 28.540                   | 0.095                 | 7                                 | 6                                 | 249                  | 16                           | 0.19                                    | 0.03                     | 0.34                     | 0.06                    | 6.8  |
| G028.541−00.237 | 28.541                          | −0.237                       | 28.540                   | −0.236                | 18                                | 12                                | 90                   | 36                           | 0.63                                    | 0.06                     | 2.96                     | 0.30                    | 16.5 |
| G028.541−00.269 | 28.541                          | −0.269                       | 28.541                   | −0.268                | 13                                | 8                                 | 126                  | 25                           | 0.44                                    | 0.05                     | 1.35                     | 0.16                    | 11.4 |
| G028.548+00.065 | 28.548                          | 0.065                        | 28.548                   | 0.067                 | 18                                | 10                                | 241                  | 28                           | 0.14                                    | 0.03                     | 0.56                     | 0.11                    | 5.6  |
| G028.557−00.225 | 28.557                          | −0.225                       | 28.554                   | −0.224                | 16                                | 12                                | 201                  | 32                           | 0.70                                    | 0.07                     | 2.31                     | 0.23                    | 17.6 |
| G028.565−00.235 | 28.565                          | −0.235                       | 28.567                   | −0.233                | 36                                | 19                                | 154                  | 65                           | 1.74                                    | 0.15                     | 16.59                    | 1.39                    | 41.6 |
| G028.581+00.145 | 28.581                          | 0.145                        | 28.581                   | 0.146                 | 20                                | 11                                | 115                  | 37                           | 0.46                                    | 0.05                     | 1.35                     | 0.14                    | 15.2 |
| G028.581−00.341 | 28.581                          | −0.341                       | 28.581                   | −0.338                | 29                                | 24                                | 270                  | 53                           | 0.61                                    | 0.06                     | 3.75                     | 0.39                    | 15.5 |
| G028.587+00.017 | 28.587                          | 0.017                        | 28.586                   | 0.018                 | 11                                | 6                                 | 150                  | 20                           | 0.13                                    | 0.03                     | 0.37                     | 0.07                    | 5.6  |
| G028.589−00.229 | 28.589                          | −0.229                       | 28.592                   | −0.228                | 17                                | 13                                | 247                  | 36                           | 0.60                                    | 0.06                     | 2.49                     | 0.26                    | 15.3 |
| G028.595+00.055 | 28.595                          | 0.055                        | 28.590                   | 0.054                 | 35                                | 15                                | 251                  | 45                           | 0.15                                    | 0.03                     | 0.99                     | 0.18                    | 6.1  |
| G028.597−00.360 | 28.597                          | −0.360                       | 28.597                   | −0.361                | 22                                | 14                                | 110                  | 43                           | 0.61                                    | 0.06                     | 3.37                     | 0.34                    | 15.7 |
| G028.598−00.022 | 28.598                          | −0.022                       | 28.597                   | −0.020                | 17                                | 12                                | 267                  | 37                           | 0.54                                    | 0.05                     | 1.96                     | 0.20                    | 16.7 |
| G028.598−00.039 | 28.598                          | −0.039                       | 28.597                   | −0.040                | 16                                | 12                                | 132                  | 30                           | 0.15                                    | 0.03                     | 0.66                     | 0.13                    | 5.4  |
| G028.603+00.003 | 28.603                          | 0.003                        | 28.600                   | 0.004                 | 16                                | 12                                | 109                  | 30                           | 0.34                                    | 0.04                     | 1.39                     | 0.16                    | 11.8 |
| G028.604−00.372 | 28.604                          | −0.372                       | 28.604                   | −0.381                | 31                                | 15                                | 91                   | 49                           | 0.45                                    | 0.05                     | 3.47                     | 0.40                    | 11.9 |
| G028.608+00.018 | 28.608                          | 0.018                        | 28.608                   | 0.018                 | 19                                | 15                                | 209                  | 48                           | 2.76                                    | 0.22                     | 7.15                     | 0.58                    | 94.2 |
| G028.610−00.027 | 28.610                          | −0.027                       | 28.608                   | −0.026                | 9                                 | 8                                 | 154                  | 22                           | 0.49                                    | 0.05                     | 0.94                     | 0.10                    | 15.7 |
| G028.611+00.030 | 28.611                          | 0.030                        | 28.613                   | 0.031                 | 19                                | 9                                 | 182                  | 32                           | 0.52                                    | 0.05                     | 1.76                     | 0.17                    | 19.1 |
| G028.623+00.055 | 28.623                          | 0.055                        | 28.622                   | 0.056                 | 11                                | 9                                 | 122                  | 25                           | 0.17                                    | 0.03                     | 0.43                     | 0.07                    | 6.7  |
| G028.628+00.158 | 28.628                          | 0.158                        | 28.628                   | 0.158                 | 13                                | 7                                 | 224                  | 23                           | 0.16                                    | 0.03                     | 0.50                     | 0.10                    | 5.5  |
| G028.634+00.031 | 28.634                          | 0.031                        | 28.633                   | 0.032                 | 7                                 | 5                                 | 200                  | 15                           | 0.14                                    | 0.02                     | 0.27                     | 0.05                    | 6.6  |
| G028.634+00.475 | 28.634                          | 0.475                        | 28.634                   | 0.474                 | 10                                | 9                                 | 231                  | 24                           | 0.38                                    | 0.05                     | 0.91                     | 0.12                    | 9.7  |
| G028.637+00.482 | 28.637                          | 0.482                        | 28.635                   | 0.484                 | 11                                | 5                                 | 215                  | 18                           | 0.20                                    | 0.04                     | 0.40                     | 0.08                    | 5.4  |
| G028.641+00.277 | 28.641                          | 0.277                        | 28.643                   | 0.277                 | 16                                | 14                                | 178                  | 35                           | 0.30                                    | 0.04                     | 1.02                     | 0.15                    | 8.0  |
| G028.647+00.255 | 28.647                          | 0.255                        | 28.647                   | 0.255                 | 10                                | 7                                 | 202                  | 21                           | 0.24                                    | 0.04                     | 0.44                     | 0.08                    | 6.5  |
| G028.650+00.125 | 28.650                          | 0.125                        | 28.646                   | 0.120                 | 22                                | 17                                | 122                  | 36                           | 0.22                                    | 0.03                     | 1.14                     | 0.16                    | 8.7  |
| G028.651+00.027 | 28.651                          | 0.027                        | 28.651                   | 0.027                 | 16                                | 14                                | 207                  | 45                           | 2.77                                    | 0.22                     | 6.51                     | 0.53                    | 96.4 |
| G028.655+00.013 | 28.655                          | 0.013                        | 28.656                   | 0.014                 | 9                                 | 7                                 | 154                  | 19                           | 0.25                                    | 0.03                     | 0.53                     | 0.07                    | 9.1  |
| G028.660+00.145 | 28.660                          | 0.145                        | 28.658                   | 0.143                 | 20                                | 11                                | 112                  | 37                           | 0.41                                    | 0.05                     | 1.64                     | 0.18                    | 13.2 |
| G028.661+00.040 | 28.661                          | 0.040                        | 28.658                   | 0.041                 | 22                                | 15                                | 213                  | 49                           | 1.22                                    | 0.10                     | 4.53                     | 0.38                    | 43.6 |
| G028.679−00.279 | 28.679                          | −0.279                       | 28.678                   | −0.277                | 14                                | 9                                 | 132                  | 30                           | 1.19                                    | 0.10                     | 2.41                     | 0.21                    | 29.3 |
| G028.681+00.032 | 28.681                          | 0.032                        | 28.680                   | 0.032                 | 12                                | 10                                | 245                  | 29                           | 0.39                                    | 0.04                     | 1.22                     | 0.13                    | 15.3 |
| G028.688+00.059 | 28.688                          | 0.059                        | 28.690                   | 0.062                 | 15                                | 7                                 | 153                  | 23                           | 0.20                                    | 0.03                     | 0.44                     | 0.06                    | 8.1  |
| G028.688+00.177 | 28.688                          | 0.177                        | 28.689                   | 0.178                 | 9                                 | 9                                 | 177                  | 25                           | 0.65                                    | 0.07                     | 1.27                     | 0.13                    | 17.0 |
| G028.688−00.283 | 28.688                          | −0.283                       | 28.689                   | −0.281                | 19                                | 15                                | 136                  | 41                           | 1.10                                    | 0.10                     | 3.72                     | 0.33                    | 27.4 |
| G028.692+00.028 | 28.692                          | 0.028                        | 28.692                   | 0.030                 | 15                                | 11                                | 236                  | 30                           | 0.51                                    | 0.05                     | 1.33                     | 0.13                    | 19.3 |
| G028.701+00.403 | 28.701                          | 0.403                        | 28.700                   | 0.405                 | 13                                | 10                                | 251                  | 32                           | 0.83                                    | 0.08                     | 1.62                     | 0.15                    | 21.1 |
| G028.701+00.432 | 28.701                          | 0.432                        | 28.701                   | 0.433                 | 9                                 | 6                                 | 116                  | 20                           | 0.30                                    | 0.05                     | 0.51                     | 0.08                    | 7.6  |
| G028.702+00.175 | 28.702                          | 0.175                        | 28.702                   | 0.176                 | 18                                | 12                                | 222                  | 33                           | 0.24                                    | 0.04                     | 1.06                     | 0.18                    | 6.5  |
| G028.703+00.040 | 28.703                          | 0.040                        | 28.700                   | 0.044                 | 23                                | 14                                | 254                  | 41                           | 0.34                                    | 0.04                     | 2.05                     | 0.22                    | 13.8 |
| G028.705+00.117 | 28.705                          | 0.117                        | 28.704                   | 0.115                 | 19                                | 9                                 | 118                  | 26                           | 0.19                                    | 0.03                     | 0.50                     | 0.09                    | 6.0  |
| G028.708−00.295 | 28.708                          | −0.295                       | 28.705                   | −0.294                | 23                                | 14                                | 202                  | 46                           | 1.07                                    | 0.09                     | 5.29                     | 0.47                    | 27.1 |
| G028.709−00.017 | 28.709                          | −0.017                       | 28.710                   | −0.013                | 14                                | 9                                 | 111                  | 26                           | 0.13                                    | 0.03                     | 0.48                     | 0.10                    | 5.2  |
| G028.712+00.048 | 28.712                          | 0.048                        | 28.716                   | 0.050                 | 26                                | 10                                | 146                  | 35                           | 0.33                                    | 0.04                     | 1.20                     | 0.13                    | 12.9 |
| G028.719+00.036 | 28.719                          | 0.036                        | 28.718                   | 0.038                 | 17                                | 7                                 | 222                  | 26                           | 0.23                                    | 0.03                     | 0.67                     | 0.09                    | 9.5  |
| G028.719+00.145 | 28.719                          | 0.145                        | 28.715                   | 0.145                 | 18                                | 7                                 | 181                  | 28                           | 0.20                                    | 0.03                     | 0.74                     | 0.12                    | 6.8  |
| G028.721−00.179 | 28.721                          | −0.179                       | 28.719                   | −0.180                | 14                                | 8                                 | 257                  | 25                           | 0.19                                    | 0.04                     | 0.63                     | 0.13                    | 5.1  |
| G028.723−00.294 | 28.723                          | −0.294                       | 28.725                   | −0.297                | 19                                | 13                                | 217                  | 38                           | 0.58                                    | 0.06                     | 2.87                     | 0.29                    | 15.6 |
| G028.729−00.237 | 28.729                          | −0.237                       | 28.731                   | −0.240                | 19                                | 12                                | 219                  | 35                           | 0.32                                    | 0.05                     | 1.32                     | 0.20                    | 7.8  |
| G028.732+00.182 | 28.732                          | 0.182                        | 28.731                   | 0.181                 | 12                                | 7                                 | 103                  | 22                           | 0.20                                    | 0.04                     | 0.53                     | 0.11                    | 5.6  |
| G028.738+00.001 | 28.738                          | 0.001                        | 28.738                   | 0.002                 | 9                                 | 6                                 | 228                  | 20                           | 0.20                                    | 0.03                     | 0.40                     | 0.07                    | 6.7  |

Table 2: Cont.

| Name            | $\ell_{\max}$<br>( $^{\circ}$ ) | $b_{\max}$<br>( $^{\circ}$ ) | $\ell$<br>( $^{\circ}$ ) | $b$<br>( $^{\circ}$ ) | $\sigma_{\text{maj}}$<br>( $''$ ) | $\sigma_{\text{min}}$<br>( $''$ ) | PA<br>( $^{\circ}$ ) | $R_{\text{eff}}$<br>( $''$ ) | $S_{\text{peak}}$<br>(Jy beam $^{-1}$ ) | $\Delta S_{\text{peak}}$ | $S_{\text{int}}$<br>(Jy) | $\Delta S_{\text{int}}$ | SNR   |
|-----------------|---------------------------------|------------------------------|--------------------------|-----------------------|-----------------------------------|-----------------------------------|----------------------|------------------------------|-----------------------------------------|--------------------------|--------------------------|-------------------------|-------|
| (1)             | (2)                             | (3)                          | (4)                      | (5)                   | (6)                               | (7)                               | (8)                  | (9)                          | (10)                                    | (11)                     | (12)                     | (13)                    | (14)  |
| G028.744−00.297 | 28.744                          | −0.297                       | 28.741                   | −0.294                | 16                                | 11                                | 209                  | 29                           | 0.27                                    | 0.04                     | 1.08                     | 0.17                    | 7.6   |
| G028.747+00.269 | 28.747                          | 0.269                        | 28.748                   | 0.273                 | 22                                | 11                                | 127                  | 31                           | 0.24                                    | 0.04                     | 0.82                     | 0.14                    | 6.7   |
| G028.758+00.059 | 28.758                          | 0.059                        | 28.757                   | 0.058                 | 13                                | 11                                | 144                  | 32                           | 0.36                                    | 0.04                     | 1.02                     | 0.12                    | 11.3  |
| G028.761+00.102 | 28.761                          | 0.102                        | 28.760                   | 0.107                 | 27                                | 14                                | 173                  | 44                           | 0.32                                    | 0.04                     | 1.96                     | 0.26                    | 9.3   |
| G028.768−00.185 | 28.768                          | −0.185                       | 28.766                   | −0.185                | 22                                | 9                                 | 169                  | 33                           | 0.28                                    | 0.04                     | 1.37                     | 0.20                    | 8.4   |
| G028.773+00.176 | 28.773                          | 0.176                        | 28.772                   | 0.175                 | 16                                | 12                                | 210                  | 35                           | 0.62                                    | 0.06                     | 2.04                     | 0.21                    | 15.6  |
| G028.777+00.233 | 28.777                          | 0.233                        | 28.768                   | 0.246                 | 47                                | 13                                | 241                  | 54                           | 0.39                                    | 0.05                     | 3.85                     | 0.49                    | 10.2  |
| G028.779+00.197 | 28.779                          | 0.197                        | 28.779                   | 0.197                 | 12                                | 6                                 | 259                  | 21                           | 0.43                                    | 0.05                     | 0.79                     | 0.10                    | 10.5  |
| G028.780+00.159 | 28.780                          | 0.159                        | 28.779                   | 0.161                 | 12                                | 7                                 | 163                  | 22                           | 0.15                                    | 0.03                     | 0.51                     | 0.10                    | 5.3   |
| G028.787+00.466 | 28.787                          | 0.466                        | 28.789                   | 0.466                 | 27                                | 13                                | 196                  | 37                           | 0.17                                    | 0.04                     | 1.21                     | 0.26                    | 5.1   |
| G028.788+00.238 | 28.788                          | 0.238                        | 28.786                   | 0.239                 | 17                                | 11                                | 235                  | 38                           | 2.00                                    | 0.16                     | 4.41                     | 0.36                    | 51.0  |
| G028.789−00.011 | 28.789                          | −0.011                       | 28.790                   | −0.011                | 21                                | 8                                 | 161                  | 31                           | 0.21                                    | 0.03                     | 0.77                     | 0.11                    | 8.7   |
| G028.792+00.139 | 28.792                          | 0.139                        | 28.791                   | 0.140                 | 6                                 | 5                                 | 130                  | 14                           | 0.22                                    | 0.04                     | 0.37                     | 0.07                    | 6.2   |
| G028.792+00.249 | 28.792                          | 0.249                        | 28.792                   | 0.250                 | 9                                 | 6                                 | 238                  | 18                           | 0.28                                    | 0.04                     | 0.57                     | 0.09                    | 7.5   |
| G028.804+00.045 | 28.804                          | 0.045                        | 28.807                   | 0.047                 | 23                                | 13                                | 122                  | 37                           | 0.22                                    | 0.03                     | 1.27                     | 0.19                    | 7.7   |
| G028.804−00.023 | 28.804                          | −0.023                       | 28.802                   | −0.021                | 16                                | 12                                | 190                  | 38                           | 1.01                                    | 0.09                     | 3.02                     | 0.26                    | 34.9  |
| G028.805+00.178 | 28.805                          | 0.178                        | 28.805                   | 0.179                 | 16                                | 12                                | 122                  | 33                           | 1.18                                    | 0.10                     | 4.88                     | 0.42                    | 30.4  |
| G028.808+00.189 | 28.808                          | 0.189                        | 28.807                   | 0.192                 | 19                                | 11                                | 269                  | 37                           | 1.00                                    | 0.09                     | 3.07                     | 0.28                    | 24.2  |
| G028.811+00.267 | 28.811                          | 0.267                        | 28.812                   | 0.266                 | 11                                | 9                                 | 128                  | 25                           | 0.19                                    | 0.04                     | 0.69                     | 0.14                    | 5.4   |
| G028.812+00.168 | 28.812                          | 0.168                        | 28.811                   | 0.167                 | 34                                | 21                                | 224                  | 58                           | 1.82                                    | 0.15                     | 7.27                     | 0.60                    | 46.0  |
| G028.818+00.365 | 28.818                          | 0.365                        | 28.818                   | 0.364                 | 18                                | 9                                 | 204                  | 38                           | 2.85                                    | 0.23                     | 3.96                     | 0.32                    | 75.9  |
| G028.818+00.422 | 28.818                          | 0.422                        | 28.816                   | 0.421                 | 15                                | 9                                 | 95                   | 28                           | 0.32                                    | 0.04                     | 0.70                     | 0.10                    | 8.5   |
| G028.820+00.355 | 28.820                          | 0.355                        | 28.821                   | 0.351                 | 19                                | 14                                | 101                  | 35                           | 0.42                                    | 0.05                     | 1.47                     | 0.17                    | 12.2  |
| G028.822+00.206 | 28.822                          | 0.206                        | 28.821                   | 0.207                 | 12                                | 8                                 | 141                  | 24                           | 0.27                                    | 0.04                     | 0.69                     | 0.11                    | 6.9   |
| G028.827+00.000 | 28.827                          | 0.000                        | 28.825                   | 0.002                 | 17                                | 8                                 | 105                  | 27                           | 0.20                                    | 0.03                     | 0.50                     | 0.08                    | 6.8   |
| G028.828+00.485 | 28.828                          | 0.485                        | 28.825                   | 0.483                 | 14                                | 9                                 | 134                  | 27                           | 0.30                                    | 0.05                     | 1.09                     | 0.17                    | 7.6   |
| G028.829−00.334 | 28.829                          | −0.334                       | 28.828                   | −0.332                | 14                                | 10                                | 99                   | 30                           | 0.39                                    | 0.05                     | 0.98                     | 0.12                    | 10.8  |
| G028.831−00.312 | 28.831                          | −0.312                       | 28.827                   | −0.310                | 21                                | 11                                | 215                  | 33                           | 0.34                                    | 0.04                     | 1.03                     | 0.14                    | 9.3   |
| G028.832−00.253 | 28.832                          | −0.253                       | 28.832                   | −0.253                | 33                                | 16                                | 162                  | 69                           | 4.12                                    | 0.33                     | 12.87                    | 1.04                    | 94.1  |
| G028.835−00.209 | 28.835                          | −0.209                       | 28.838                   | −0.209                | 20                                | 15                                | 189                  | 43                           | 0.88                                    | 0.08                     | 3.12                     | 0.29                    | 20.5  |
| G028.842+00.493 | 28.842                          | 0.493                        | 28.841                   | 0.494                 | 19                                | 10                                | 167                  | 39                           | 1.51                                    | 0.13                     | 3.32                     | 0.28                    | 35.2  |
| G028.844+00.051 | 28.844                          | 0.051                        | 28.848                   | 0.050                 | 23                                | 16                                | 209                  | 44                           | 0.38                                    | 0.04                     | 2.89                     | 0.33                    | 12.2  |
| G028.848−00.228 | 28.848                          | −0.228                       | 28.847                   | −0.226                | 14                                | 8                                 | 223                  | 28                           | 0.60                                    | 0.06                     | 1.50                     | 0.16                    | 14.7  |
| G028.854−00.219 | 28.854                          | −0.219                       | 28.854                   | −0.218                | 13                                | 10                                | 218                  | 26                           | 0.29                                    | 0.05                     | 1.05                     | 0.17                    | 7.2   |
| G028.862+00.066 | 28.862                          | 0.066                        | 28.864                   | 0.069                 | 32                                | 20                                | 131                  | 71                           | 3.56                                    | 0.29                     | 13.35                    | 1.08                    | 102.4 |
| G028.873+00.457 | 28.873                          | 0.457                        | 28.872                   | 0.457                 | 7                                 | 6                                 | 179                  | 17                           | 0.24                                    | 0.04                     | 0.39                     | 0.07                    | 6.0   |
| G028.882−00.021 | 28.882                          | −0.021                       | 28.881                   | −0.021                | 14                                | 12                                | 181                  | 40                           | 1.48                                    | 0.12                     | 2.79                     | 0.23                    | 46.4  |
| G028.883+00.502 | 28.883                          | 0.502                        | 28.882                   | 0.499                 | 17                                | 12                                | 180                  | 32                           | 0.21                                    | 0.04                     | 0.93                     | 0.18                    | 5.8   |
| G028.911−00.550 | 28.911                          | −0.550                       | 28.915                   | −0.546                | 24                                | 14                                | 117                  | 35                           | 0.16                                    | 0.03                     | 0.75                     | 0.14                    | 5.8   |
| G028.921−00.229 | 28.921                          | −0.229                       | 28.918                   | −0.230                | 26                                | 10                                | 143                  | 37                           | 0.49                                    | 0.05                     | 1.36                     | 0.14                    | 14.7  |
| G028.927+00.393 | 28.927                          | 0.393                        | 28.931                   | 0.394                 | 24                                | 18                                | 256                  | 46                           | 0.52                                    | 0.06                     | 2.89                     | 0.32                    | 13.2  |
| G028.929+00.019 | 28.929                          | 0.019                        | 28.928                   | 0.019                 | 7                                 | 6                                 | 147                  | 19                           | 0.37                                    | 0.05                     | 0.57                     | 0.08                    | 9.0   |
| G028.931−00.227 | 28.931                          | −0.227                       | 28.930                   | −0.225                | 14                                | 11                                | 136                  | 32                           | 0.47                                    | 0.05                     | 1.25                     | 0.13                    | 14.5  |
| G028.934+00.032 | 28.934                          | 0.032                        | 28.935                   | 0.033                 | 7                                 | 6                                 | 154                  | 18                           | 0.28                                    | 0.05                     | 0.44                     | 0.07                    | 6.7   |
| G028.959−00.202 | 28.959                          | −0.202                       | 28.959                   | −0.204                | 16                                | 8                                 | 245                  | 30                           | 0.67                                    | 0.06                     | 1.10                     | 0.10                    | 22.6  |
| G028.959−00.475 | 28.959                          | −0.475                       | 28.956                   | −0.475                | 18                                | 11                                | 167                  | 30                           | 0.13                                    | 0.03                     | 0.56                     | 0.11                    | 5.3   |
| G028.963−00.737 | 28.963                          | −0.737                       | 28.963                   | −0.738                | 13                                | 11                                | 248                  | 27                           | 0.22                                    | 0.04                     | 0.69                     | 0.13                    | 5.7   |
| G028.965−00.594 | 28.965                          | −0.594                       | 28.964                   | −0.593                | 16                                | 7                                 | 252                  | 29                           | 0.46                                    | 0.05                     | 0.99                     | 0.11                    | 13.9  |
| G028.969−00.014 | 28.969                          | −0.014                       | 28.967                   | −0.014                | 8                                 | 6                                 | 164                  | 17                           | 0.20                                    | 0.04                     | 0.34                     | 0.07                    | 5.4   |
| G028.969−00.623 | 28.969                          | −0.623                       | 28.966                   | −0.621                | 23                                | 12                                | 224                  | 39                           | 0.32                                    | 0.04                     | 1.59                     | 0.21                    | 9.7   |
| G028.973+00.080 | 28.973                          | 0.080                        | 28.976                   | 0.082                 | 12                                | 8                                 | 133                  | 23                           | 0.20                                    | 0.03                     | 0.65                     | 0.12                    | 6.4   |
| G028.982+00.068 | 28.982                          | 0.068                        | 28.979                   | 0.069                 | 17                                | 6                                 | 192                  | 23                           | 0.25                                    | 0.04                     | 0.59                     | 0.09                    | 7.2   |
| G028.987+00.090 | 28.987                          | 0.090                        | 28.984                   | 0.091                 | 10                                | 6                                 | 188                  | 19                           | 0.30                                    | 0.04                     | 0.55                     | 0.08                    | 8.0   |
| G028.987−00.621 | 28.987                          | −0.621                       | 28.985                   | −0.625                | 25                                | 12                                | 113                  | 41                           | 0.48                                    | 0.05                     | 2.34                     | 0.25                    | 14.2  |
| G028.988−00.644 | 28.988                          | −0.644                       | 28.988                   | −0.643                | 7                                 | 7                                 | 176                  | 17                           | 0.19                                    | 0.04                     | 0.39                     | 0.08                    | 5.7   |
| G028.993+00.030 | 28.993                          | 0.030                        | 28.996                   | 0.028                 | 19                                | 7                                 | 223                  | 26                           | 0.20                                    | 0.04                     | 0.72                     | 0.14                    | 5.5   |

Table 2: Cont.

| Name            | $\ell_{\max}$<br>( $^{\circ}$ ) | $b_{\max}$<br>( $^{\circ}$ ) | $\ell$<br>( $^{\circ}$ ) | $b$<br>( $^{\circ}$ ) | $\sigma_{\text{maj}}$<br>( $''$ ) | $\sigma_{\text{min}}$<br>( $''$ ) | PA<br>( $^{\circ}$ ) | $R_{\text{eff}}$<br>( $''$ ) | $S_{\text{peak}}$<br>(Jy beam $^{-1}$ ) | $\Delta S_{\text{peak}}$ | $S_{\text{int}}$<br>(Jy) | $\Delta S_{\text{int}}$ | SNR  |
|-----------------|---------------------------------|------------------------------|--------------------------|-----------------------|-----------------------------------|-----------------------------------|----------------------|------------------------------|-----------------------------------------|--------------------------|--------------------------|-------------------------|------|
| (1)             | (2)                             | (3)                          | (4)                      | (5)                   | (6)                               | (7)                               | (8)                  | (9)                          | (10)                                    | (11)                     | (12)                     | (13)                    | (14) |
| G029.002+00.068 | 29.002                          | 0.068                        | 29.000                   | 0.069                 | 16                                | 9                                 | 209                  | 30                           | 0.45                                    | 0.05                     | 1.44                     | 0.17                    | 11.8 |
| G029.004+00.038 | 29.004                          | 0.038                        | 29.007                   | 0.037                 | 23                                | 13                                | 207                  | 34                           | 0.16                                    | 0.03                     | 1.05                     | 0.22                    | 5.1  |
| G029.011−00.605 | 29.011                          | −0.605                       | 29.013                   | −0.603                | 16                                | 9                                 | 122                  | 28                           | 0.19                                    | 0.04                     | 0.68                     | 0.13                    | 5.7  |
| G029.015−00.177 | 29.015                          | −0.177                       | 29.014                   | −0.177                | 22                                | 13                                | 184                  | 44                           | 0.52                                    | 0.05                     | 2.01                     | 0.20                    | 17.3 |
| G029.030−00.529 | 29.030                          | −0.529                       | 29.025                   | −0.527                | 23                                | 12                                | 233                  | 38                           | 0.19                                    | 0.03                     | 1.07                     | 0.19                    | 6.2  |
| G029.033+00.032 | 29.033                          | 0.032                        | 29.033                   | 0.035                 | 22                                | 12                                | 142                  | 37                           | 0.15                                    | 0.03                     | 1.09                     | 0.23                    | 5.2  |
| G029.053+00.506 | 29.053                          | 0.506                        | 29.052                   | 0.506                 | 9                                 | 6                                 | 214                  | 19                           | 0.28                                    | 0.05                     | 0.47                     | 0.08                    | 7.2  |
| G029.068−00.543 | 29.068                          | −0.543                       | 29.065                   | −0.544                | 20                                | 10                                | 204                  | 32                           | 0.17                                    | 0.04                     | 0.83                     | 0.17                    | 5.1  |
| G029.094−00.602 | 29.094                          | −0.602                       | 29.092                   | −0.602                | 9                                 | 7                                 | 225                  | 18                           | 0.17                                    | 0.04                     | 0.44                     | 0.09                    | 5.2  |
| G029.102−00.610 | 29.102                          | −0.610                       | 29.102                   | −0.610                | 11                                | 6                                 | 231                  | 20                           | 0.21                                    | 0.04                     | 0.54                     | 0.11                    | 5.3  |
| G029.107−00.297 | 29.107                          | −0.297                       | 29.105                   | −0.298                | 23                                | 17                                | 178                  | 41                           | 0.49                                    | 0.06                     | 2.30                     | 0.27                    | 11.6 |
| G029.113+00.102 | 29.113                          | 0.102                        | 29.113                   | 0.102                 | 25                                | 11                                | 183                  | 36                           | 0.23                                    | 0.04                     | 1.43                     | 0.22                    | 7.4  |
| G029.115−00.319 | 29.115                          | −0.319                       | 29.123                   | −0.320                | 35                                | 12                                | 203                  | 42                           | 0.28                                    | 0.05                     | 2.12                     | 0.35                    | 7.0  |
| G029.119+00.028 | 29.119                          | 0.028                        | 29.117                   | 0.028                 | 15                                | 11                                | 144                  | 34                           | 0.54                                    | 0.05                     | 1.80                     | 0.18                    | 17.2 |
| G029.119+00.088 | 29.119                          | 0.088                        | 29.119                   | 0.090                 | 16                                | 10                                | 216                  | 30                           | 0.33                                    | 0.04                     | 1.05                     | 0.13                    | 10.4 |
| G029.123−00.152 | 29.123                          | −0.152                       | 29.124                   | −0.153                | 17                                | 9                                 | 193                  | 29                           | 0.24                                    | 0.04                     | 0.88                     | 0.13                    | 8.3  |
| G029.129−00.145 | 29.129                          | −0.145                       | 29.126                   | −0.143                | 16                                | 10                                | 234                  | 30                           | 0.24                                    | 0.04                     | 0.88                     | 0.13                    | 8.3  |
| G029.137−00.014 | 29.137                          | −0.014                       | 29.134                   | −0.010                | 16                                | 13                                | 226                  | 30                           | 0.14                                    | 0.03                     | 0.48                     | 0.10                    | 5.5  |
| G029.140−00.147 | 29.140                          | −0.147                       | 29.139                   | −0.146                | 12                                | 6                                 | 119                  | 20                           | 0.18                                    | 0.03                     | 0.45                     | 0.08                    | 6.3  |
| G029.141+00.031 | 29.141                          | 0.031                        | 29.139                   | 0.034                 | 18                                | 10                                | 179                  | 32                           | 0.24                                    | 0.04                     | 0.97                     | 0.15                    | 7.8  |
| G029.145+00.126 | 29.145                          | 0.126                        | 29.152                   | 0.125                 | 27                                | 8                                 | 180                  | 30                           | 0.20                                    | 0.03                     | 0.65                     | 0.12                    | 6.4  |
| G029.158+00.460 | 29.158                          | 0.460                        | 29.156                   | 0.465                 | 28                                | 16                                | 135                  | 40                           | 0.20                                    | 0.04                     | 1.43                     | 0.27                    | 5.8  |
| G029.174−00.497 | 29.174                          | −0.497                       | 29.172                   | −0.491                | 18                                | 16                                | 127                  | 32                           | 0.20                                    | 0.04                     | 0.86                     | 0.18                    | 5.2  |
| G029.177+00.059 | 29.177                          | 0.059                        | 29.177                   | 0.061                 | 11                                | 8                                 | 242                  | 24                           | 0.19                                    | 0.04                     | 0.52                     | 0.10                    | 5.7  |
| G029.187+00.003 | 29.187                          | 0.003                        | 29.186                   | 0.005                 | 30                                | 14                                | 267                  | 39                           | 0.11                                    | 0.02                     | 0.71                     | 0.15                    | 5.0  |
| G029.189−00.409 | 29.189                          | −0.409                       | 29.189                   | −0.408                | 9                                 | 6                                 | 257                  | 20                           | 0.38                                    | 0.05                     | 0.61                     | 0.09                    | 8.6  |
| G029.191+00.066 | 29.191                          | 0.066                        | 29.190                   | 0.066                 | 16                                | 14                                | 260                  | 35                           | 0.28                                    | 0.04                     | 1.02                     | 0.14                    | 9.0  |
| G029.193+00.130 | 29.193                          | 0.130                        | 29.192                   | 0.128                 | 19                                | 16                                | 147                  | 37                           | 0.42                                    | 0.05                     | 1.23                     | 0.14                    | 13.0 |
| G029.210+00.130 | 29.210                          | 0.130                        | 29.210                   | 0.130                 | 6                                 | 5                                 | 155                  | 14                           | 0.17                                    | 0.03                     | 0.26                     | 0.05                    | 5.8  |
| G029.228+00.025 | 29.228                          | 0.025                        | 29.226                   | 0.025                 | 15                                | 12                                | 110                  | 40                           | 0.80                                    | 0.07                     | 2.39                     | 0.21                    | 29.4 |
| G029.235−00.048 | 29.235                          | −0.048                       | 29.233                   | −0.047                | 17                                | 15                                | 251                  | 43                           | 0.60                                    | 0.06                     | 2.23                     | 0.21                    | 21.7 |
| G029.235−00.331 | 29.235                          | −0.331                       | 29.235                   | −0.330                | 10                                | 6                                 | 131                  | 18                           | 0.25                                    | 0.05                     | 0.55                     | 0.10                    | 5.8  |
| G029.238+00.233 | 29.238                          | 0.233                        | 29.232                   | 0.234                 | 28                                | 8                                 | 181                  | 27                           | 0.20                                    | 0.04                     | 0.53                     | 0.10                    | 5.7  |
| G029.241−00.679 | 29.241                          | −0.679                       | 29.241                   | −0.670                | 26                                | 14                                | 246                  | 43                           | 0.34                                    | 0.05                     | 2.24                     | 0.32                    | 8.6  |
| G029.243+00.249 | 29.243                          | 0.249                        | 29.241                   | 0.254                 | 19                                | 8                                 | 251                  | 31                           | 0.35                                    | 0.05                     | 1.02                     | 0.14                    | 9.3  |
| G029.245+00.071 | 29.245                          | 0.071                        | 29.245                   | 0.078                 | 27                                | 13                                | 256                  | 40                           | 0.24                                    | 0.03                     | 1.09                     | 0.15                    | 9.2  |
| G029.247−00.693 | 29.247                          | −0.693                       | 29.246                   | −0.692                | 9                                 | 8                                 | 114                  | 25                           | 0.79                                    | 0.08                     | 1.19                     | 0.11                    | 18.8 |
| G029.255+00.058 | 29.255                          | 0.058                        | 29.256                   | 0.059                 | 12                                | 8                                 | 217                  | 23                           | 0.13                                    | 0.02                     | 0.41                     | 0.08                    | 5.7  |
| G029.263−00.484 | 29.263                          | −0.484                       | 29.261                   | −0.480                | 17                                | 5                                 | 248                  | 23                           | 0.22                                    | 0.05                     | 0.63                     | 0.14                    | 5.0  |
| G029.276+00.366 | 29.276                          | 0.366                        | 29.274                   | 0.364                 | 15                                | 11                                | 184                  | 29                           | 0.21                                    | 0.04                     | 0.84                     | 0.17                    | 5.4  |
| G029.277−00.129 | 29.277                          | −0.129                       | 29.276                   | −0.129                | 12                                | 10                                | 155                  | 30                           | 0.63                                    | 0.06                     | 1.34                     | 0.13                    | 17.1 |
| G029.282−00.330 | 29.282                          | −0.330                       | 29.285                   | −0.332                | 35                                | 11                                | 204                  | 48                           | 0.76                                    | 0.08                     | 3.70                     | 0.37                    | 16.7 |
| G029.294+00.132 | 29.294                          | 0.132                        | 29.295                   | 0.129                 | 30                                | 10                                | 226                  | 40                           | 0.25                                    | 0.03                     | 1.41                     | 0.20                    | 8.8  |
| G029.308−00.052 | 29.308                          | −0.052                       | 29.307                   | −0.051                | 20                                | 8                                 | 168                  | 31                           | 0.19                                    | 0.03                     | 0.74                     | 0.14                    | 6.1  |
| G029.320−00.162 | 29.320                          | −0.162                       | 29.319                   | −0.162                | 9                                 | 6                                 | 236                  | 20                           | 0.57                                    | 0.06                     | 0.89                     | 0.10                    | 12.2 |
| G029.347−00.454 | 29.347                          | −0.454                       | 29.342                   | −0.449                | 28                                | 11                                | 217                  | 38                           | 0.25                                    | 0.04                     | 1.45                     | 0.26                    | 6.3  |
| G029.362−00.315 | 29.362                          | −0.315                       | 29.364                   | −0.317                | 13                                | 9                                 | 229                  | 25                           | 0.26                                    | 0.05                     | 0.93                     | 0.17                    | 5.9  |
| G029.375−00.130 | 29.375                          | −0.130                       | 29.374                   | −0.129                | 8                                 | 7                                 | 115                  | 19                           | 0.23                                    | 0.05                     | 0.55                     | 0.11                    | 5.5  |
| G029.375−00.410 | 29.375                          | −0.410                       | 29.378                   | −0.409                | 22                                | 9                                 | 163                  | 30                           | 0.37                                    | 0.05                     | 1.11                     | 0.16                    | 8.6  |
| G029.396−00.093 | 29.396                          | −0.093                       | 29.397                   | −0.093                | 14                                | 11                                | 186                  | 36                           | 1.47                                    | 0.13                     | 3.46                     | 0.30                    | 33.1 |
| G029.410−00.645 | 29.410                          | −0.645                       | 29.408                   | −0.643                | 18                                | 14                                | 93                   | 38                           | 0.54                                    | 0.06                     | 2.30                     | 0.27                    | 11.8 |
| G029.418−00.044 | 29.418                          | −0.044                       | 29.415                   | −0.044                | 14                                | 8                                 | 158                  | 26                           | 0.21                                    | 0.04                     | 0.67                     | 0.14                    | 5.2  |
| G029.438−00.173 | 29.438                          | −0.173                       | 29.435                   | −0.173                | 16                                | 9                                 | 177                  | 33                           | 0.67                                    | 0.07                     | 2.21                     | 0.24                    | 13.9 |
| G029.464+00.008 | 29.464                          | 0.008                        | 29.464                   | 0.012                 | 26                                | 12                                | 126                  | 37                           | 0.20                                    | 0.03                     | 1.06                     | 0.18                    | 6.6  |
| G029.475−00.178 | 29.475                          | −0.178                       | 29.477                   | −0.177                | 16                                | 12                                | 167                  | 37                           | 0.85                                    | 0.09                     | 2.77                     | 0.28                    | 16.1 |
| G029.492+00.151 | 29.492                          | 0.151                        | 29.492                   | 0.153                 | 9                                 | 7                                 | 132                  | 22                           | 0.26                                    | 0.03                     | 0.47                     | 0.06                    | 9.7  |

Table 2: Cont.

| Name            | $\ell_{\max}$<br>( $^{\circ}$ ) | $b_{\max}$<br>( $^{\circ}$ ) | $\ell$<br>( $^{\circ}$ ) | $b$<br>( $^{\circ}$ ) | $\sigma_{\text{maj}}$<br>( $''$ ) | $\sigma_{\text{min}}$<br>( $''$ ) | PA<br>( $^{\circ}$ ) | $R_{\text{eff}}$<br>( $''$ ) | $S_{\text{peak}}$<br>(Jy beam $^{-1}$ ) | $\Delta S_{\text{peak}}$ | $S_{\text{int}}$<br>(Jy) | $\Delta S_{\text{int}}$ | SNR  |
|-----------------|---------------------------------|------------------------------|--------------------------|-----------------------|-----------------------------------|-----------------------------------|----------------------|------------------------------|-----------------------------------------|--------------------------|--------------------------|-------------------------|------|
| (1)             | (2)                             | (3)                          | (4)                      | (5)                   | (6)                               | (7)                               | (8)                  | (9)                          | (10)                                    | (11)                     | (12)                     | (13)                    | (14) |
| G029.496+00.168 | 29.496                          | 0.168                        | 29.495                   | 0.169                 | 8                                 | 7                                 | 120                  | 17                           | 0.14                                    | 0.03                     | 0.31                     | 0.06                    | 5.9  |
| G029.496+00.182 | 29.496                          | 0.182                        | 29.495                   | 0.183                 | 14                                | 9                                 | 259                  | 27                           | 0.28                                    | 0.04                     | 0.63                     | 0.08                    | 10.6 |
| G029.503+00.383 | 29.503                          | 0.383                        | 29.501                   | 0.385                 | 17                                | 10                                | 232                  | 34                           | 0.42                                    | 0.04                     | 1.22                     | 0.13                    | 14.9 |
| G029.536+00.180 | 29.536                          | 0.180                        | 29.534                   | 0.180                 | 21                                | 8                                 | 138                  | 29                           | 0.18                                    | 0.03                     | 0.64                     | 0.10                    | 7.5  |
| G029.557+00.185 | 29.557                          | 0.185                        | 29.556                   | 0.185                 | 20                                | 13                                | 221                  | 43                           | 0.47                                    | 0.05                     | 1.76                     | 0.17                    | 17.8 |
| G029.578−00.269 | 29.578                          | −0.269                       | 29.577                   | −0.268                | 6                                 | 5                                 | 119                  | 17                           | 0.82                                    | 0.08                     | 0.90                     | 0.09                    | 18.4 |
| G029.581+00.132 | 29.581                          | 0.132                        | 29.581                   | 0.134                 | 9                                 | 4                                 | 120                  | 16                           | 0.15                                    | 0.03                     | 0.25                     | 0.05                    | 5.3  |
| G029.590−00.613 | 29.590                          | −0.613                       | 29.591                   | −0.613                | 22                                | 17                                | 201                  | 45                           | 0.89                                    | 0.08                     | 4.84                     | 0.46                    | 19.5 |
| G029.599−00.600 | 29.599                          | −0.600                       | 29.600                   | −0.593                | 20                                | 7                                 | 103                  | 26                           | 0.27                                    | 0.05                     | 1.09                     | 0.18                    | 6.8  |
| G029.603−00.624 | 29.603                          | −0.624                       | 29.602                   | −0.623                | 17                                | 12                                | 248                  | 36                           | 0.91                                    | 0.09                     | 3.81                     | 0.37                    | 18.8 |
| G029.604−00.579 | 29.604                          | −0.579                       | 29.605                   | −0.577                | 16                                | 14                                | 206                  | 31                           | 0.26                                    | 0.05                     | 1.23                     | 0.23                    | 6.0  |
| G029.607+00.198 | 29.607                          | 0.198                        | 29.602                   | 0.203                 | 25                                | 7                                 | 226                  | 28                           | 0.18                                    | 0.04                     | 0.60                     | 0.12                    | 5.6  |
| G029.624+00.250 | 29.624                          | 0.250                        | 29.623                   | 0.253                 | 24                                | 12                                | 238                  | 37                           | 0.31                                    | 0.05                     | 1.32                     | 0.19                    | 8.2  |
| G029.630+00.109 | 29.630                          | 0.109                        | 29.629                   | 0.110                 | 16                                | 13                                | 227                  | 36                           | 0.26                                    | 0.03                     | 1.19                     | 0.15                    | 10.1 |
| G029.701+00.125 | 29.701                          | 0.125                        | 29.700                   | 0.126                 | 24                                | 11                                | 269                  | 33                           | 0.14                                    | 0.03                     | 0.59                     | 0.11                    | 5.7  |
| G029.741−00.024 | 29.741                          | −0.024                       | 29.740                   | −0.024                | 11                                | 8                                 | 232                  | 21                           | 0.15                                    | 0.03                     | 0.37                     | 0.06                    | 6.4  |
| G029.750+00.143 | 29.750                          | 0.143                        | 29.751                   | 0.143                 | 18                                | 8                                 | 219                  | 23                           | 0.17                                    | 0.03                     | 0.41                     | 0.08                    | 5.4  |
| G029.763−00.022 | 29.763                          | −0.022                       | 29.763                   | −0.022                | 6                                 | 5                                 | 108                  | 14                           | 0.12                                    | 0.03                     | 0.20                     | 0.04                    | 5.1  |
| G029.771+00.215 | 29.771                          | 0.215                        | 29.770                   | 0.216                 | 12                                | 10                                | 147                  | 32                           | 0.62                                    | 0.06                     | 1.36                     | 0.14                    | 16.6 |
| G029.780−00.260 | 29.780                          | −0.260                       | 29.778                   | −0.261                | 11                                | 7                                 | 263                  | 24                           | 0.56                                    | 0.06                     | 1.10                     | 0.12                    | 13.0 |
| G029.785−00.273 | 29.785                          | −0.273                       | 29.785                   | −0.272                | 10                                | 8                                 | 241                  | 21                           | 0.24                                    | 0.05                     | 0.67                     | 0.13                    | 5.6  |
| G029.791+00.052 | 29.791                          | 0.052                        | 29.791                   | 0.052                 | 11                                | 7                                 | 201                  | 21                           | 0.21                                    | 0.03                     | 0.43                     | 0.07                    | 7.7  |
| G029.793+00.190 | 29.793                          | 0.190                        | 29.794                   | 0.193                 | 20                                | 14                                | 194                  | 32                           | 0.20                                    | 0.04                     | 0.71                     | 0.13                    | 6.2  |
| G029.801−00.033 | 29.801                          | −0.033                       | 29.800                   | −0.032                | 14                                | 10                                | 182                  | 30                           | 0.36                                    | 0.04                     | 0.81                     | 0.09                    | 12.8 |
| G029.822−00.094 | 29.822                          | −0.094                       | 29.821                   | −0.090                | 20                                | 9                                 | 259                  | 34                           | 0.26                                    | 0.03                     | 1.04                     | 0.13                    | 10.1 |
| G029.824−00.049 | 29.824                          | −0.049                       | 29.824                   | −0.047                | 12                                | 8                                 | 226                  | 22                           | 0.10                                    | 0.02                     | 0.38                     | 0.08                    | 5.2  |
| G029.829−00.063 | 29.829                          | −0.063                       | 29.829                   | −0.067                | 20                                | 15                                | 168                  | 38                           | 0.30                                    | 0.03                     | 1.38                     | 0.16                    | 12.2 |
| G029.830−00.262 | 29.830                          | −0.262                       | 29.831                   | −0.261                | 14                                | 7                                 | 136                  | 23                           | 0.21                                    | 0.04                     | 0.66                     | 0.14                    | 5.0  |
| G029.831+00.011 | 29.831                          | 0.011                        | 29.832                   | 0.010                 | 18                                | 10                                | 91                   | 31                           | 0.34                                    | 0.04                     | 0.93                     | 0.11                    | 11.4 |
| G029.837−00.099 | 29.837                          | −0.099                       | 29.837                   | −0.100                | 16                                | 11                                | 106                  | 32                           | 0.37                                    | 0.04                     | 1.16                     | 0.12                    | 13.9 |
| G029.840−00.474 | 29.840                          | −0.474                       | 29.840                   | −0.474                | 12                                | 9                                 | 205                  | 26                           | 0.34                                    | 0.05                     | 0.93                     | 0.14                    | 7.8  |
| G029.841−00.034 | 29.841                          | −0.034                       | 29.841                   | −0.033                | 17                                | 14                                | 110                  | 40                           | 0.49                                    | 0.05                     | 2.05                     | 0.20                    | 18.3 |
| G029.843−00.049 | 29.843                          | −0.049                       | 29.843                   | −0.048                | 7                                 | 7                                 | 242                  | 16                           | 0.16                                    | 0.02                     | 0.36                     | 0.06                    | 7.3  |
| G029.845+00.002 | 29.845                          | 0.002                        | 29.847                   | 0.002                 | 19                                | 16                                | 244                  | 43                           | 0.54                                    | 0.05                     | 2.12                     | 0.20                    | 18.6 |
| G029.853−00.059 | 29.853                          | −0.059                       | 29.853                   | −0.058                | 15                                | 11                                | 213                  | 35                           | 1.10                                    | 0.09                     | 3.21                     | 0.27                    | 41.4 |
| G029.860−00.054 | 29.860                          | −0.054                       | 29.858                   | −0.053                | 15                                | 6                                 | 218                  | 23                           | 0.81                                    | 0.07                     | 1.83                     | 0.16                    | 30.3 |
| G029.861+00.031 | 29.861                          | 0.031                        | 29.861                   | 0.030                 | 24                                | 18                                | 118                  | 52                           | 0.50                                    | 0.05                     | 3.74                     | 0.38                    | 16.3 |
| G029.862−00.044 | 29.862                          | −0.044                       | 29.864                   | −0.042                | 25                                | 13                                | 114                  | 47                           | 1.58                                    | 0.13                     | 5.34                     | 0.44                    | 56.8 |
| G029.865+00.961 | 29.865                          | 0.961                        | 29.864                   | 0.961                 | 4                                 | 4                                 | 158                  | 10                           | 0.22                                    | 0.04                     | 0.27                     | 0.05                    | 6.0  |
| G029.867−00.010 | 29.867                          | −0.010                       | 29.867                   | −0.008                | 7                                 | 5                                 | 159                  | 14                           | 0.17                                    | 0.03                     | 0.29                     | 0.05                    | 6.3  |
| G029.882−00.063 | 29.882                          | −0.063                       | 29.881                   | −0.064                | 9                                 | 7                                 | 101                  | 18                           | 0.12                                    | 0.02                     | 0.31                     | 0.06                    | 6.0  |
| G029.885−00.772 | 29.885                          | −0.772                       | 29.883                   | −0.767                | 20                                | 10                                | 242                  | 34                           | 0.46                                    | 0.05                     | 1.70                     | 0.20                    | 11.4 |
| G029.886+00.005 | 29.886                          | 0.005                        | 29.889                   | 0.004                 | 17                                | 16                                | 108                  | 40                           | 0.68                                    | 0.06                     | 3.21                     | 0.29                    | 22.6 |
| G029.887−00.782 | 29.887                          | −0.782                       | 29.887                   | −0.781                | 14                                | 11                                | 210                  | 32                           | 0.72                                    | 0.07                     | 2.51                     | 0.25                    | 16.4 |
| G029.888−00.010 | 29.888                          | −0.010                       | 29.889                   | −0.010                | 18                                | 13                                | 167                  | 38                           | 0.61                                    | 0.06                     | 2.68                     | 0.25                    | 19.7 |
| G029.888−00.029 | 29.888                          | −0.029                       | 29.890                   | −0.030                | 12                                | 8                                 | 231                  | 23                           | 0.36                                    | 0.04                     | 0.86                     | 0.10                    | 13.1 |
| G029.896−00.215 | 29.896                          | −0.215                       | 29.895                   | −0.218                | 28                                | 13                                | 139                  | 44                           | 0.38                                    | 0.05                     | 2.11                     | 0.25                    | 11.3 |
| G029.900−00.062 | 29.900                          | −0.062                       | 29.899                   | −0.063                | 13                                | 9                                 | 118                  | 28                           | 0.51                                    | 0.05                     | 1.46                     | 0.13                    | 21.6 |
| G029.906−00.073 | 29.906                          | −0.073                       | 29.905                   | −0.072                | 13                                | 9                                 | 155                  | 24                           | 0.18                                    | 0.02                     | 0.68                     | 0.09                    | 9.6  |
| G029.907−00.806 | 29.907                          | −0.806                       | 29.906                   | −0.804                | 19                                | 10                                | 184                  | 32                           | 0.34                                    | 0.05                     | 1.43                     | 0.22                    | 7.4  |
| G029.910−00.324 | 29.910                          | −0.324                       | 29.910                   | −0.324                | 14                                | 8                                 | 204                  | 26                           | 0.15                                    | 0.03                     | 0.55                     | 0.12                    | 5.1  |
| G029.912−00.043 | 29.912                          | −0.043                       | 29.909                   | −0.043                | 24                                | 18                                | 163                  | 55                           | 2.63                                    | 0.21                     | 12.21                    | 0.99                    | 94.4 |
| G029.913+00.095 | 29.913                          | 0.095                        | 29.911                   | 0.093                 | 15                                | 12                                | 191                  | 29                           | 0.18                                    | 0.04                     | 0.86                     | 0.17                    | 5.4  |
| G029.915−00.023 | 29.915                          | −0.023                       | 29.915                   | −0.023                | 9                                 | 5                                 | 244                  | 17                           | 0.31                                    | 0.04                     | 0.50                     | 0.06                    | 12.5 |
| G029.917−00.053 | 29.917                          | −0.053                       | 29.916                   | −0.054                | 17                                | 10                                | 268                  | 29                           | 1.43                                    | 0.12                     | 4.36                     | 0.36                    | 55.8 |
| G029.921−00.017 | 29.921                          | −0.017                       | 29.920                   | −0.014                | 13                                | 9                                 | 266                  | 29                           | 0.88                                    | 0.08                     | 2.47                     | 0.21                    | 29.8 |

Table 2: Cont.

| Name            | $\ell_{\max}$<br>( $^{\circ}$ ) | $b_{\max}$<br>( $^{\circ}$ ) | $\ell$<br>( $^{\circ}$ ) | $b$<br>( $^{\circ}$ ) | $\sigma_{\text{maj}}$<br>( $''$ ) | $\sigma_{\text{min}}$<br>( $''$ ) | PA<br>( $^{\circ}$ ) | $R_{\text{eff}}$<br>( $''$ ) | $S_{\text{peak}}$<br>(Jy beam $^{-1}$ ) | $\Delta S_{\text{peak}}$ | $S_{\text{int}}$<br>(Jy) | $\Delta S_{\text{int}}$ | SNR   |
|-----------------|---------------------------------|------------------------------|--------------------------|-----------------------|-----------------------------------|-----------------------------------|----------------------|------------------------------|-----------------------------------------|--------------------------|--------------------------|-------------------------|-------|
| (1)             | (2)                             | (3)                          | (4)                      | (5)                   | (6)                               | (7)                               | (8)                  | (9)                          | (10)                                    | (11)                     | (12)                     | (13)                    | (14)  |
| G029.923−00.054 | 29.923                          | −0.054                       | 29.923                   | −0.053                | 11                                | 7                                 | 269                  | 20                           | 1.28                                    | 0.11                     | 3.27                     | 0.27                    | 50.6  |
| G029.928−00.008 | 29.928                          | −0.008                       | 29.928                   | −0.008                | 16                                | 8                                 | 240                  | 28                           | 0.49                                    | 0.05                     | 1.64                     | 0.17                    | 15.0  |
| G029.928−00.042 | 29.928                          | −0.042                       | 29.928                   | −0.041                | 16                                | 10                                | 130                  | 30                           | 1.01                                    | 0.08                     | 3.95                     | 0.33                    | 39.5  |
| G029.930−00.065 | 29.930                          | −0.065                       | 29.933                   | −0.067                | 20                                | 18                                | 95                   | 48                           | 2.31                                    | 0.19                     | 9.23                     | 0.75                    | 85.1  |
| G029.934−00.051 | 29.934                          | −0.051                       | 29.940                   | −0.050                | 22                                | 14                                | 170                  | 39                           | 1.13                                    | 0.09                     | 6.68                     | 0.56                    | 44.9  |
| G029.937−00.011 | 29.937                          | −0.011                       | 29.938                   | −0.011                | 10                                | 7                                 | 208                  | 19                           | 0.55                                    | 0.05                     | 1.11                     | 0.11                    | 17.3  |
| G029.938+00.017 | 29.938                          | 0.017                        | 29.942                   | 0.018                 | 18                                | 13                                | 146                  | 36                           | 0.32                                    | 0.05                     | 1.81                     | 0.26                    | 8.3   |
| G029.941−00.019 | 29.941                          | −0.019                       | 29.938                   | −0.019                | 13                                | 6                                 | 176                  | 21                           | 0.35                                    | 0.04                     | 0.89                     | 0.10                    | 12.4  |
| G029.941−00.787 | 29.941                          | −0.787                       | 29.939                   | −0.787                | 11                                | 10                                | 181                  | 24                           | 0.37                                    | 0.06                     | 1.17                     | 0.18                    | 7.3   |
| G029.948−00.060 | 29.948                          | −0.060                       | 29.949                   | −0.059                | 13                                | 10                                | 163                  | 25                           | 0.68                                    | 0.06                     | 2.18                     | 0.19                    | 27.6  |
| G029.950−00.785 | 29.950                          | −0.785                       | 29.949                   | −0.784                | 9                                 | 8                                 | 184                  | 20                           | 0.31                                    | 0.05                     | 0.79                     | 0.12                    | 7.6   |
| G029.951+00.028 | 29.951                          | 0.028                        | 29.950                   | 0.027                 | 9                                 | 7                                 | 185                  | 20                           | 0.29                                    | 0.05                     | 0.63                     | 0.10                    | 7.1   |
| G029.953+00.052 | 29.953                          | 0.052                        | 29.953                   | 0.058                 | 26                                | 10                                | 125                  | 33                           | 0.18                                    | 0.04                     | 0.93                     | 0.18                    | 5.8   |
| G029.953+00.152 | 29.953                          | 0.152                        | 29.952                   | 0.152                 | 11                                | 9                                 | 120                  | 25                           | 0.36                                    | 0.05                     | 0.89                     | 0.12                    | 9.0   |
| G029.955−00.017 | 29.955                          | −0.017                       | 29.956                   | −0.014                | 18                                | 14                                | 137                  | 49                           | 10.47                                   | 0.84                     | 20.88                    | 1.67                    | 301.9 |
| G029.957−00.306 | 29.957                          | −0.306                       | 29.956                   | −0.304                | 23                                | 13                                | 138                  | 35                           | 0.16                                    | 0.03                     | 0.67                     | 0.14                    | 5.2   |
| G029.961−00.068 | 29.961                          | −0.068                       | 29.959                   | −0.068                | 10                                | 8                                 | 257                  | 25                           | 0.59                                    | 0.05                     | 1.12                     | 0.10                    | 22.5  |
| G029.962−00.040 | 29.962                          | −0.040                       | 29.961                   | −0.039                | 7                                 | 5                                 | 141                  | 15                           | 0.11                                    | 0.02                     | 0.24                     | 0.04                    | 6.9   |
| G029.962−00.791 | 29.962                          | −0.791                       | 29.961                   | −0.787                | 20                                | 14                                | 242                  | 44                           | 0.77                                    | 0.07                     | 2.73                     | 0.26                    | 19.2  |
| G029.964−00.025 | 29.964                          | −0.025                       | 29.967                   | −0.026                | 16                                | 10                                | 198                  | 27                           | 0.38                                    | 0.04                     | 1.53                     | 0.17                    | 13.4  |
| G029.967−00.162 | 29.967                          | −0.162                       | 29.965                   | −0.160                | 15                                | 6                                 | 209                  | 25                           | 0.23                                    | 0.03                     | 0.54                     | 0.08                    | 8.5   |
| G029.968−00.103 | 29.968                          | −0.103                       | 29.968                   | −0.103                | 10                                | 8                                 | 121                  | 21                           | 0.15                                    | 0.03                     | 0.38                     | 0.07                    | 5.5   |
| G029.970−00.010 | 29.970                          | −0.010                       | 29.974                   | −0.012                | 20                                | 12                                | 218                  | 37                           | 1.05                                    | 0.09                     | 3.99                     | 0.34                    | 31.3  |
| G029.972−00.416 | 29.972                          | −0.416                       | 29.968                   | −0.414                | 23                                | 12                                | 175                  | 38                           | 0.21                                    | 0.03                     | 1.25                     | 0.18                    | 8.4   |
| G029.976−00.048 | 29.976                          | −0.048                       | 29.972                   | −0.049                | 28                                | 18                                | 140                  | 60                           | 2.35                                    | 0.19                     | 10.64                    | 0.86                    | 77.9  |
| G029.976−00.111 | 29.976                          | −0.111                       | 29.975                   | −0.109                | 11                                | 8                                 | 135                  | 22                           | 0.21                                    | 0.03                     | 0.50                     | 0.08                    | 7.7   |
| G029.986−00.171 | 29.986                          | −0.171                       | 29.986                   | −0.170                | 12                                | 10                                | 201                  | 25                           | 0.16                                    | 0.03                     | 0.50                     | 0.09                    | 6.3   |
| G029.995−00.058 | 29.995                          | −0.058                       | 29.997                   | −0.056                | 11                                | 7                                 | 160                  | 20                           | 0.26                                    | 0.03                     | 0.56                     | 0.07                    | 9.7   |
| G029.996+00.002 | 29.996                          | 0.002                        | 29.996                   | 0.003                 | 8                                 | 6                                 | 91                   | 19                           | 0.38                                    | 0.05                     | 0.65                     | 0.08                    | 9.7   |
| G029.997−00.143 | 29.997                          | −0.143                       | 29.997                   | −0.141                | 19                                | 11                                | 103                  | 38                           | 0.51                                    | 0.05                     | 1.44                     | 0.14                    | 19.4  |
| G030.003−00.270 | 30.003                          | −0.270                       | 30.003                   | −0.266                | 20                                | 12                                | 139                  | 44                           | 1.37                                    | 0.11                     | 5.41                     | 0.45                    | 44.5  |
| G030.004−00.038 | 30.004                          | −0.038                       | 30.003                   | −0.037                | 12                                | 9                                 | 187                  | 23                           | 0.30                                    | 0.04                     | 0.99                     | 0.12                    | 10.7  |
| G030.004−00.047 | 30.004                          | −0.047                       | 30.003                   | −0.046                | 10                                | 7                                 | 123                  | 19                           | 0.32                                    | 0.04                     | 0.80                     | 0.10                    | 11.2  |
| G030.006−00.122 | 30.006                          | −0.122                       | 30.007                   | −0.120                | 15                                | 12                                | 217                  | 35                           | 0.38                                    | 0.04                     | 1.57                     | 0.17                    | 13.2  |
| G030.006−00.130 | 30.006                          | −0.130                       | 30.002                   | −0.129                | 23                                | 9                                 | 200                  | 31                           | 0.25                                    | 0.03                     | 0.93                     | 0.13                    | 9.1   |
| G030.009−00.009 | 30.009                          | −0.009                       | 30.007                   | −0.006                | 13                                | 8                                 | 211                  | 25                           | 0.22                                    | 0.04                     | 0.88                     | 0.16                    | 6.2   |
| G030.010−00.273 | 30.010                          | −0.273                       | 30.009                   | −0.275                | 21                                | 14                                | 105                  | 45                           | 2.03                                    | 0.17                     | 5.45                     | 0.44                    | 65.2  |
| G030.011+00.035 | 30.011                          | 0.035                        | 30.010                   | 0.035                 | 13                                | 6                                 | 231                  | 22                           | 0.24                                    | 0.04                     | 0.65                     | 0.11                    | 6.4   |
| G030.013+00.097 | 30.013                          | 0.097                        | 30.016                   | 0.089                 | 29                                | 14                                | 242                  | 37                           | 0.20                                    | 0.04                     | 1.04                     | 0.19                    | 6.2   |
| G030.014−00.031 | 30.014                          | −0.031                       | 30.012                   | −0.029                | 15                                | 14                                | 96                   | 34                           | 0.48                                    | 0.05                     | 2.06                     | 0.21                    | 14.9  |
| G030.017−00.083 | 30.017                          | −0.083                       | 30.016                   | −0.081                | 10                                | 5                                 | 97                   | 17                           | 0.17                                    | 0.03                     | 0.32                     | 0.06                    | 5.7   |
| G030.018−00.048 | 30.018                          | −0.048                       | 30.019                   | −0.049                | 25                                | 20                                | 96                   | 59                           | 1.23                                    | 0.10                     | 8.46                     | 0.71                    | 40.2  |
| G030.023+00.107 | 30.023                          | 0.107                        | 30.022                   | 0.107                 | 12                                | 10                                | 130                  | 27                           | 0.44                                    | 0.05                     | 1.29                     | 0.15                    | 12.6  |
| G030.032+00.116 | 30.032                          | 0.116                        | 30.030                   | 0.119                 | 17                                | 11                                | 105                  | 33                           | 0.46                                    | 0.05                     | 1.65                     | 0.18                    | 13.1  |
| G030.032−00.251 | 30.032                          | −0.251                       | 30.031                   | −0.250                | 8                                 | 8                                 | 102                  | 21                           | 0.20                                    | 0.03                     | 0.46                     | 0.07                    | 7.5   |
| G030.033+00.107 | 30.033                          | 0.107                        | 30.031                   | 0.106                 | 10                                | 8                                 | 172                  | 22                           | 0.41                                    | 0.05                     | 0.99                     | 0.11                    | 12.0  |
| G030.036−00.181 | 30.036                          | −0.181                       | 30.033                   | −0.182                | 22                                | 15                                | 116                  | 38                           | 0.14                                    | 0.03                     | 0.81                     | 0.15                    | 6.0   |
| G030.057+00.099 | 30.057                          | 0.099                        | 30.060                   | 0.097                 | 27                                | 21                                | 259                  | 42                           | 0.47                                    | 0.05                     | 1.48                     | 0.16                    | 13.6  |
| G030.097+00.045 | 30.097                          | 0.045                        | 30.097                   | 0.050                 | 28                                | 13                                | 126                  | 41                           | 0.23                                    | 0.03                     | 1.13                     | 0.17                    | 8.0   |
| G030.100+00.076 | 30.100                          | 0.076                        | 30.098                   | 0.078                 | 18                                | 9                                 | 198                  | 34                           | 0.61                                    | 0.06                     | 1.64                     | 0.16                    | 16.7  |
| G030.106−00.258 | 30.106                          | −0.258                       | 30.105                   | −0.257                | 17                                | 13                                | 152                  | 37                           | 0.24                                    | 0.03                     | 1.18                     | 0.17                    | 8.2   |
| G030.108−00.068 | 30.108                          | −0.068                       | 30.109                   | −0.069                | 19                                | 11                                | 202                  | 30                           | 0.20                                    | 0.03                     | 0.64                     | 0.10                    | 8.0   |
| G030.123+00.068 | 30.123                          | 0.068                        | 30.120                   | 0.065                 | 24                                | 10                                | 103                  | 35                           | 0.16                                    | 0.03                     | 0.94                     | 0.17                    | 6.4   |
| G030.132−00.648 | 30.132                          | −0.648                       | 30.131                   | −0.649                | 21                                | 10                                | 97                   | 32                           | 0.19                                    | 0.04                     | 0.84                     | 0.16                    | 5.8   |
| G030.144−00.069 | 30.144                          | −0.069                       | 30.140                   | −0.068                | 32                                | 12                                | 126                  | 46                           | 0.28                                    | 0.03                     | 1.83                     | 0.21                    | 11.6  |
| G030.155+00.582 | 30.155                          | 0.582                        | 30.154                   | 0.584                 | 11                                | 9                                 | 123                  | 24                           | 0.24                                    | 0.04                     | 0.49                     | 0.08                    | 7.2   |



Table 2: Cont.

| Name            | $\ell_{\max}$<br>( $^{\circ}$ ) | $b_{\max}$<br>( $^{\circ}$ ) | $\ell$<br>( $^{\circ}$ ) | $b$<br>( $^{\circ}$ ) | $\sigma_{\text{maj}}$<br>( $''$ ) | $\sigma_{\text{min}}$<br>( $''$ ) | PA<br>( $^{\circ}$ ) | $R_{\text{eff}}$<br>( $''$ ) | $S_{\text{peak}}$<br>(Jy beam $^{-1}$ ) | $\Delta S_{\text{peak}}$ | $S_{\text{int}}$<br>(Jy) | $\Delta S_{\text{int}}$ | SNR  |
|-----------------|---------------------------------|------------------------------|--------------------------|-----------------------|-----------------------------------|-----------------------------------|----------------------|------------------------------|-----------------------------------------|--------------------------|--------------------------|-------------------------|------|
| (1)             | (2)                             | (3)                          | (4)                      | (5)                   | (6)                               | (7)                               | (8)                  | (9)                          | (10)                                    | (11)                     | (12)                     | (13)                    | (14) |
| G030.197+00.310 | 30.197                          | 0.310                        | 30.197                   | 0.310                 | 10                                | 9                                 | 200                  | 25                           | 0.58                                    | 0.06                     | 1.12                     | 0.12                    | 15.3 |
| G030.199−00.145 | 30.199                          | −0.145                       | 30.196                   | −0.142                | 16                                | 11                                | 239                  | 30                           | 0.24                                    | 0.03                     | 0.86                     | 0.11                    | 9.7  |
| G030.199−00.169 | 30.199                          | −0.169                       | 30.202                   | −0.163                | 24                                | 13                                | 113                  | 40                           | 0.96                                    | 0.08                     | 2.65                     | 0.23                    | 32.7 |
| G030.200−00.121 | 30.200                          | −0.121                       | 30.197                   | −0.121                | 40                                | 15                                | 161                  | 50                           | 0.28                                    | 0.03                     | 1.31                     | 0.15                    | 11.6 |
| G030.207−00.134 | 30.207                          | −0.134                       | 30.206                   | −0.132                | 7                                 | 5                                 | 254                  | 13                           | 0.11                                    | 0.02                     | 0.19                     | 0.04                    | 5.7  |
| G030.211+00.429 | 30.211                          | 0.429                        | 30.211                   | 0.430                 | 11                                | 9                                 | 259                  | 24                           | 0.24                                    | 0.04                     | 0.63                     | 0.10                    | 7.2  |
| G030.215−00.188 | 30.215                          | −0.188                       | 30.215                   | −0.187                | 38                                | 14                                | 249                  | 61                           | 1.40                                    | 0.12                     | 9.03                     | 0.76                    | 41.1 |
| G030.216+00.020 | 30.216                          | 0.020                        | 30.216                   | 0.020                 | 18                                | 10                                | 263                  | 32                           | 0.22                                    | 0.03                     | 0.81                     | 0.11                    | 9.3  |
| G030.222−00.090 | 30.222                          | −0.090                       | 30.218                   | −0.084                | 21                                | 15                                | 253                  | 40                           | 0.20                                    | 0.03                     | 1.12                     | 0.16                    | 8.4  |
| G030.226−00.181 | 30.226                          | −0.181                       | 30.225                   | −0.179                | 20                                | 13                                | 232                  | 42                           | 1.17                                    | 0.10                     | 3.73                     | 0.32                    | 35.8 |
| G030.229−00.223 | 30.229                          | −0.223                       | 30.227                   | −0.222                | 15                                | 10                                | 218                  | 25                           | 0.26                                    | 0.04                     | 0.67                     | 0.10                    | 8.0  |
| G030.237+00.569 | 30.237                          | 0.569                        | 30.237                   | 0.569                 | 9                                 | 8                                 | 166                  | 24                           | 0.59                                    | 0.06                     | 0.99                     | 0.10                    | 15.5 |
| G030.239−00.002 | 30.239                          | −0.002                       | 30.241                   | 0.003                 | 19                                | 9                                 | 110                  | 29                           | 0.12                                    | 0.02                     | 0.54                     | 0.11                    | 5.4  |
| G030.240+00.240 | 30.240                          | 0.240                        | 30.238                   | 0.240                 | 9                                 | 6                                 | 195                  | 17                           | 0.16                                    | 0.03                     | 0.38                     | 0.08                    | 5.3  |
| G030.246+00.049 | 30.246                          | 0.049                        | 30.242                   | 0.047                 | 25                                | 13                                | 141                  | 40                           | 0.55                                    | 0.05                     | 1.54                     | 0.14                    | 21.3 |
| G030.246+00.246 | 30.246                          | 0.246                        | 30.247                   | 0.247                 | 19                                | 13                                | 119                  | 36                           | 0.29                                    | 0.04                     | 1.38                     | 0.19                    | 8.7  |
| G030.250−00.231 | 30.250                          | −0.231                       | 30.251                   | −0.229                | 8                                 | 6                                 | 120                  | 18                           | 0.20                                    | 0.04                     | 0.40                     | 0.07                    | 5.9  |
| G030.254+00.053 | 30.254                          | 0.053                        | 30.254                   | 0.050                 | 26                                | 12                                | 257                  | 39                           | 0.83                                    | 0.07                     | 2.46                     | 0.21                    | 31.2 |
| G030.264+00.029 | 30.264                          | 0.029                        | 30.265                   | 0.034                 | 25                                | 13                                | 110                  | 41                           | 0.27                                    | 0.03                     | 1.49                     | 0.18                    | 10.8 |
| G030.274−00.037 | 30.274                          | −0.037                       | 30.274                   | −0.036                | 11                                | 9                                 | 221                  | 23                           | 0.15                                    | 0.03                     | 0.41                     | 0.07                    | 6.5  |
| G030.275−00.232 | 30.275                          | −0.232                       | 30.273                   | −0.231                | 13                                | 7                                 | 172                  | 26                           | 0.43                                    | 0.05                     | 1.01                     | 0.11                    | 12.7 |
| G030.285+00.058 | 30.285                          | 0.058                        | 30.284                   | 0.059                 | 12                                | 10                                | 223                  | 28                           | 0.36                                    | 0.04                     | 0.93                     | 0.10                    | 14.6 |
| G030.288−00.232 | 30.288                          | −0.232                       | 30.290                   | −0.234                | 14                                | 11                                | 227                  | 29                           | 0.29                                    | 0.04                     | 1.15                     | 0.15                    | 9.8  |
| G030.296+00.055 | 30.296                          | 0.055                        | 30.296                   | 0.057                 | 17                                | 12                                | 109                  | 37                           | 1.19                                    | 0.10                     | 2.52                     | 0.21                    | 47.2 |
| G030.296−00.225 | 30.296                          | −0.225                       | 30.298                   | −0.228                | 17                                | 9                                 | 220                  | 28                           | 0.28                                    | 0.04                     | 1.15                     | 0.15                    | 10.1 |
| G030.299−00.291 | 30.299                          | −0.291                       | 30.301                   | −0.285                | 25                                | 14                                | 145                  | 41                           | 0.24                                    | 0.04                     | 1.53                     | 0.24                    | 7.3  |
| G030.300−00.203 | 30.300                          | −0.203                       | 30.300                   | −0.206                | 23                                | 18                                | 250                  | 49                           | 0.79                                    | 0.07                     | 4.18                     | 0.37                    | 25.0 |
| G030.305+00.132 | 30.305                          | 0.132                        | 30.306                   | 0.132                 | 23                                | 11                                | 105                  | 35                           | 0.13                                    | 0.02                     | 0.76                     | 0.14                    | 5.9  |
| G030.307+00.080 | 30.307                          | 0.080                        | 30.306                   | 0.080                 | 17                                | 12                                | 103                  | 33                           | 0.33                                    | 0.04                     | 1.29                     | 0.14                    | 13.8 |
| G030.308−00.193 | 30.308                          | −0.193                       | 30.312                   | −0.187                | 25                                | 10                                | 129                  | 34                           | 0.25                                    | 0.03                     | 1.29                     | 0.18                    | 8.8  |
| G030.310−00.246 | 30.310                          | −0.246                       | 30.309                   | −0.247                | 12                                | 7                                 | 161                  | 21                           | 0.24                                    | 0.04                     | 0.49                     | 0.07                    | 8.2  |
| G030.316−00.139 | 30.316                          | −0.139                       | 30.316                   | −0.140                | 15                                | 8                                 | 91                   | 28                           | 0.29                                    | 0.04                     | 1.00                     | 0.13                    | 10.4 |
| G030.316−00.155 | 30.316                          | −0.155                       | 30.316                   | −0.156                | 15                                | 9                                 | 247                  | 28                           | 0.24                                    | 0.04                     | 0.89                     | 0.14                    | 7.3  |
| G030.318+00.070 | 30.318                          | 0.070                        | 30.316                   | 0.074                 | 24                                | 12                                | 266                  | 41                           | 0.74                                    | 0.06                     | 2.27                     | 0.20                    | 30.9 |
| G030.318+00.116 | 30.318                          | 0.116                        | 30.315                   | 0.112                 | 29                                | 13                                | 111                  | 38                           | 0.23                                    | 0.03                     | 1.10                     | 0.14                    | 10.3 |
| G030.318−00.193 | 30.318                          | −0.193                       | 30.320                   | −0.194                | 14                                | 9                                 | 240                  | 26                           | 0.24                                    | 0.03                     | 0.88                     | 0.13                    | 8.2  |
| G030.321+00.050 | 30.321                          | 0.050                        | 30.321                   | 0.053                 | 16                                | 10                                | 229                  | 28                           | 0.13                                    | 0.02                     | 0.49                     | 0.09                    | 6.5  |
| G030.322+00.294 | 30.322                          | 0.294                        | 30.321                   | 0.294                 | 17                                | 13                                | 146                  | 36                           | 0.43                                    | 0.05                     | 1.46                     | 0.17                    | 12.0 |
| G030.324−00.785 | 30.324                          | −0.785                       | 30.320                   | −0.786                | 22                                | 13                                | 228                  | 32                           | 0.20                                    | 0.04                     | 0.68                     | 0.12                    | 6.1  |
| G030.332+00.117 | 30.332                          | 0.117                        | 30.329                   | 0.114                 | 25                                | 13                                | 257                  | 40                           | 0.47                                    | 0.05                     | 1.67                     | 0.16                    | 18.6 |
| G030.339−00.251 | 30.339                          | −0.251                       | 30.338                   | −0.251                | 8                                 | 6                                 | 132                  | 17                           | 0.21                                    | 0.04                     | 0.43                     | 0.08                    | 6.4  |
| G030.343−00.115 | 30.343                          | −0.115                       | 30.342                   | −0.118                | 17                                | 13                                | 91                   | 37                           | 0.67                                    | 0.06                     | 1.86                     | 0.17                    | 22.5 |
| G030.348+00.392 | 30.348                          | 0.392                        | 30.348                   | 0.391                 | 18                                | 12                                | 254                  | 40                           | 1.03                                    | 0.09                     | 2.49                     | 0.22                    | 28.3 |
| G030.349−00.835 | 30.349                          | −0.835                       | 30.352                   | −0.835                | 23                                | 9                                 | 168                  | 35                           | 0.26                                    | 0.04                     | 1.17                     | 0.18                    | 7.4  |
| G030.350+00.086 | 30.350                          | 0.086                        | 30.352                   | 0.086                 | 12                                | 9                                 | 159                  | 26                           | 0.32                                    | 0.04                     | 0.85                     | 0.10                    | 12.6 |
| G030.350+00.097 | 30.350                          | 0.097                        | 30.349                   | 0.097                 | 12                                | 10                                | 238                  | 27                           | 0.32                                    | 0.04                     | 0.89                     | 0.10                    | 13.1 |
| G030.350−00.274 | 30.350                          | −0.274                       | 30.352                   | −0.271                | 16                                | 11                                | 257                  | 30                           | 0.20                                    | 0.04                     | 0.92                     | 0.17                    | 6.1  |
| G030.352+00.519 | 30.352                          | 0.519                        | 30.350                   | 0.520                 | 16                                | 7                                 | 204                  | 26                           | 0.38                                    | 0.05                     | 0.74                     | 0.10                    | 10.0 |
| G030.354−00.130 | 30.354                          | −0.130                       | 30.356                   | −0.126                | 14                                | 6                                 | 139                  | 21                           | 0.17                                    | 0.03                     | 0.51                     | 0.09                    | 6.5  |
| G030.360−00.822 | 30.360                          | −0.822                       | 30.363                   | −0.824                | 18                                | 8                                 | 211                  | 26                           | 0.21                                    | 0.04                     | 0.55                     | 0.10                    | 6.3  |
| G030.361−00.089 | 30.361                          | −0.089                       | 30.359                   | −0.091                | 19                                | 10                                | 148                  | 27                           | 0.16                                    | 0.03                     | 0.51                     | 0.11                    | 5.2  |
| G030.363−00.324 | 30.363                          | −0.324                       | 30.362                   | −0.324                | 20                                | 13                                | 139                  | 37                           | 0.32                                    | 0.04                     | 1.24                     | 0.16                    | 9.6  |
| G030.364+00.106 | 30.364                          | 0.106                        | 30.367                   | 0.108                 | 30                                | 15                                | 169                  | 53                           | 0.79                                    | 0.07                     | 4.54                     | 0.39                    | 30.5 |
| G030.367+00.288 | 30.367                          | 0.288                        | 30.367                   | 0.289                 | 13                                | 9                                 | 122                  | 27                           | 0.28                                    | 0.04                     | 0.73                     | 0.11                    | 7.9  |
| G030.370+00.482 | 30.370                          | 0.482                        | 30.366                   | 0.484                 | 22                                | 10                                | 198                  | 39                           | 0.70                                    | 0.07                     | 1.98                     | 0.19                    | 20.7 |
| G030.370−00.135 | 30.370                          | −0.135                       | 30.370                   | −0.133                | 14                                | 11                                | 212                  | 30                           | 0.29                                    | 0.04                     | 0.99                     | 0.13                    | 9.7  |

Table 2: Cont.

| Name            | $\ell_{\max}$<br>( $^{\circ}$ ) | $b_{\max}$<br>( $^{\circ}$ ) | $\ell$<br>( $^{\circ}$ ) | $b$<br>( $^{\circ}$ ) | $\sigma_{\text{maj}}$<br>( $''$ ) | $\sigma_{\text{min}}$<br>( $''$ ) | PA<br>( $^{\circ}$ ) | $R_{\text{eff}}$<br>( $''$ ) | $S_{\text{peak}}$<br>(Jy beam $^{-1}$ ) | $\Delta S_{\text{peak}}$ | $S_{\text{int}}$<br>(Jy) | $\Delta S_{\text{int}}$ | SNR   |
|-----------------|---------------------------------|------------------------------|--------------------------|-----------------------|-----------------------------------|-----------------------------------|----------------------|------------------------------|-----------------------------------------|--------------------------|--------------------------|-------------------------|-------|
| (1)             | (2)                             | (3)                          | (4)                      | (5)                   | (6)                               | (7)                               | (8)                  | (9)                          | (10)                                    | (11)                     | (12)                     | (13)                    | (14)  |
| G030.379−00.009 | 30.379                          | −0.009                       | 30.378                   | −0.007                | 14                                | 10                                | 234                  | 31                           | 0.32                                    | 0.04                     | 0.87                     | 0.10                    | 11.9  |
| G030.388−00.105 | 30.388                          | −0.105                       | 30.389                   | −0.104                | 26                                | 17                                | 184                  | 58                           | 1.77                                    | 0.15                     | 6.84                     | 0.56                    | 53.5  |
| G030.390+00.122 | 30.390                          | 0.122                        | 30.386                   | 0.124                 | 17                                | 16                                | 263                  | 40                           | 0.53                                    | 0.05                     | 1.87                     | 0.18                    | 20.3  |
| G030.397−00.052 | 30.397                          | −0.052                       | 30.398                   | −0.050                | 18                                | 14                                | 161                  | 32                           | 0.21                                    | 0.04                     | 0.77                     | 0.14                    | 6.4   |
| G030.398+00.319 | 30.398                          | 0.319                        | 30.395                   | 0.318                 | 16                                | 6                                 | 146                  | 25                           | 0.18                                    | 0.03                     | 0.52                     | 0.10                    | 6.0   |
| G030.401−00.296 | 30.401                          | −0.296                       | 30.401                   | −0.299                | 21                                | 13                                | 245                  | 44                           | 1.12                                    | 0.10                     | 2.60                     | 0.22                    | 32.0  |
| G030.411−00.123 | 30.411                          | −0.123                       | 30.409                   | −0.123                | 16                                | 5                                 | 179                  | 21                           | 0.21                                    | 0.03                     | 0.44                     | 0.07                    | 7.3   |
| G030.415+00.142 | 30.415                          | 0.142                        | 30.415                   | 0.146                 | 15                                | 8                                 | 127                  | 25                           | 0.17                                    | 0.03                     | 0.43                     | 0.07                    | 6.8   |
| G030.420−00.232 | 30.420                          | −0.232                       | 30.424                   | −0.233                | 33                                | 19                                | 245                  | 65                           | 4.31                                    | 0.35                     | 14.28                    | 1.15                    | 125.5 |
| G030.421−00.195 | 30.421                          | −0.195                       | 30.421                   | −0.194                | 15                                | 12                                | 258                  | 35                           | 0.40                                    | 0.05                     | 1.61                     | 0.18                    | 12.3  |
| G030.423+00.465 | 30.423                          | 0.465                        | 30.420                   | 0.471                 | 39                                | 21                                | 255                  | 60                           | 0.60                                    | 0.06                     | 3.42                     | 0.32                    | 19.7  |
| G030.425−00.214 | 30.425                          | −0.214                       | 30.426                   | −0.213                | 18                                | 14                                | 193                  | 39                           | 1.12                                    | 0.09                     | 3.95                     | 0.34                    | 34.6  |
| G030.427−00.269 | 30.427                          | −0.269                       | 30.427                   | −0.273                | 33                                | 9                                 | 266                  | 34                           | 0.29                                    | 0.04                     | 1.11                     | 0.16                    | 8.6   |
| G030.431−00.116 | 30.431                          | −0.116                       | 30.432                   | −0.116                | 14                                | 9                                 | 107                  | 31                           | 0.52                                    | 0.05                     | 1.48                     | 0.15                    | 15.8  |
| G030.437−00.371 | 30.437                          | −0.371                       | 30.436                   | −0.371                | 10                                | 8                                 | 144                  | 23                           | 0.28                                    | 0.04                     | 0.71                     | 0.10                    | 8.2   |
| G030.438−00.100 | 30.438                          | −0.100                       | 30.435                   | −0.101                | 23                                | 14                                | 163                  | 39                           | 0.30                                    | 0.04                     | 1.78                     | 0.23                    | 9.5   |
| G030.439−00.381 | 30.439                          | −0.381                       | 30.436                   | −0.383                | 14                                | 12                                | 260                  | 32                           | 0.51                                    | 0.05                     | 1.46                     | 0.15                    | 15.0  |
| G030.446−00.214 | 30.446                          | −0.214                       | 30.445                   | −0.214                | 10                                | 7                                 | 203                  | 21                           | 0.22                                    | 0.03                     | 0.56                     | 0.08                    | 8.5   |
| G030.447−00.024 | 30.447                          | −0.024                       | 30.447                   | −0.024                | 21                                | 16                                | 201                  | 40                           | 0.24                                    | 0.03                     | 1.39                     | 0.21                    | 8.0   |
| G030.456−00.135 | 30.456                          | −0.135                       | 30.454                   | −0.135                | 15                                | 9                                 | 186                  | 28                           | 0.36                                    | 0.04                     | 1.09                     | 0.13                    | 10.8  |
| G030.463+00.032 | 30.463                          | 0.032                        | 30.463                   | 0.034                 | 19                                | 14                                | 132                  | 46                           | 0.93                                    | 0.08                     | 2.78                     | 0.24                    | 31.4  |
| G030.463−00.132 | 30.463                          | −0.132                       | 30.468                   | −0.137                | 21                                | 10                                | 234                  | 31                           | 0.26                                    | 0.04                     | 1.18                     | 0.17                    | 8.3   |
| G030.473−00.054 | 30.473                          | −0.054                       | 30.471                   | −0.053                | 23                                | 11                                | 155                  | 35                           | 0.21                                    | 0.04                     | 1.16                     | 0.21                    | 6.0   |
| G030.477−00.161 | 30.477                          | −0.161                       | 30.477                   | −0.163                | 20                                | 14                                | 252                  | 34                           | 0.19                                    | 0.03                     | 1.14                     | 0.20                    | 6.5   |
| G030.482−00.150 | 30.482                          | −0.150                       | 30.484                   | −0.151                | 14                                | 8                                 | 197                  | 25                           | 0.17                                    | 0.03                     | 0.67                     | 0.12                    | 6.0   |
| G030.483−00.059 | 30.483                          | −0.059                       | 30.484                   | −0.060                | 17                                | 7                                 | 252                  | 26                           | 0.22                                    | 0.04                     | 0.73                     | 0.14                    | 5.8   |
| G030.484−00.422 | 30.484                          | −0.422                       | 30.488                   | −0.420                | 22                                | 13                                | 149                  | 36                           | 0.16                                    | 0.03                     | 1.21                     | 0.26                    | 5.0   |
| G030.486−00.021 | 30.486                          | −0.021                       | 30.487                   | −0.019                | 25                                | 20                                | 163                  | 46                           | 0.36                                    | 0.05                     | 1.82                     | 0.24                    | 9.7   |
| G030.486−00.375 | 30.486                          | −0.375                       | 30.485                   | −0.375                | 16                                | 9                                 | 112                  | 28                           | 0.20                                    | 0.03                     | 0.74                     | 0.13                    | 6.7   |
| G030.486−00.434 | 30.486                          | −0.434                       | 30.486                   | −0.433                | 13                                | 8                                 | 235                  | 23                           | 0.16                                    | 0.03                     | 0.57                     | 0.12                    | 5.2   |
| G030.489−00.403 | 30.489                          | −0.403                       | 30.488                   | −0.404                | 11                                | 8                                 | 118                  | 24                           | 0.27                                    | 0.04                     | 0.74                     | 0.11                    | 8.1   |
| G030.492−00.300 | 30.492                          | −0.300                       | 30.490                   | −0.298                | 14                                | 9                                 | 256                  | 27                           | 0.32                                    | 0.04                     | 0.91                     | 0.12                    | 9.8   |
| G030.495−00.390 | 30.495                          | −0.390                       | 30.499                   | −0.388                | 21                                | 15                                | 200                  | 38                           | 0.23                                    | 0.04                     | 1.39                     | 0.22                    | 7.2   |
| G030.495−00.462 | 30.495                          | −0.462                       | 30.495                   | −0.455                | 20                                | 11                                | 97                   | 33                           | 0.19                                    | 0.03                     | 1.21                     | 0.22                    | 6.2   |
| G030.498−00.225 | 30.498                          | −0.225                       | 30.498                   | −0.225                | 11                                | 8                                 | 255                  | 23                           | 0.23                                    | 0.04                     | 0.57                     | 0.10                    | 6.3   |
| G030.501−00.265 | 30.501                          | −0.265                       | 30.492                   | −0.272                | 28                                | 22                                | 115                  | 45                           | 0.19                                    | 0.04                     | 1.45                     | 0.28                    | 5.6   |
| G030.501−00.495 | 30.501                          | −0.495                       | 30.502                   | −0.494                | 17                                | 16                                | 161                  | 36                           | 0.24                                    | 0.04                     | 1.17                     | 0.18                    | 7.3   |
| G030.502+00.171 | 30.502                          | 0.171                        | 30.501                   | 0.172                 | 12                                | 9                                 | 194                  | 28                           | 0.43                                    | 0.04                     | 0.85                     | 0.09                    | 16.1  |
| G030.504−00.329 | 30.504                          | −0.329                       | 30.495                   | −0.335                | 40                                | 15                                | 145                  | 49                           | 0.37                                    | 0.04                     | 2.31                     | 0.28                    | 10.9  |
| G030.508−00.202 | 30.508                          | −0.202                       | 30.510                   | −0.200                | 19                                | 12                                | 180                  | 31                           | 0.18                                    | 0.04                     | 0.98                     | 0.20                    | 5.4   |
| G030.509−00.302 | 30.509                          | −0.302                       | 30.508                   | −0.302                | 9                                 | 6                                 | 118                  | 18                           | 0.18                                    | 0.04                     | 0.43                     | 0.09                    | 5.4   |
| G030.511+00.040 | 30.511                          | 0.040                        | 30.510                   | 0.040                 | 8                                 | 6                                 | 219                  | 18                           | 0.21                                    | 0.03                     | 0.41                     | 0.06                    | 7.9   |
| G030.513+00.029 | 30.513                          | 0.029                        | 30.514                   | 0.030                 | 11                                | 10                                | 245                  | 24                           | 0.35                                    | 0.04                     | 0.86                     | 0.11                    | 10.7  |
| G030.514−00.463 | 30.514                          | −0.463                       | 30.511                   | −0.454                | 29                                | 15                                | 236                  | 41                           | 0.19                                    | 0.03                     | 1.63                     | 0.28                    | 6.5   |
| G030.526−00.462 | 30.526                          | −0.462                       | 30.524                   | −0.460                | 15                                | 8                                 | 229                  | 25                           | 0.17                                    | 0.03                     | 0.69                     | 0.13                    | 5.8   |
| G030.531−00.260 | 30.531                          | −0.260                       | 30.530                   | −0.259                | 10                                | 6                                 | 151                  | 21                           | 0.63                                    | 0.06                     | 0.96                     | 0.09                    | 17.9  |
| G030.536+00.020 | 30.536                          | 0.020                        | 30.532                   | 0.022                 | 21                                | 14                                | 187                  | 48                           | 1.86                                    | 0.15                     | 5.36                     | 0.44                    | 60.1  |
| G030.536−00.001 | 30.536                          | −0.001                       | 30.540                   | −0.000                | 27                                | 14                                | 247                  | 36                           | 0.25                                    | 0.04                     | 1.30                     | 0.21                    | 7.1   |
| G030.540+00.324 | 30.540                          | 0.324                        | 30.539                   | 0.329                 | 16                                | 14                                | 112                  | 33                           | 0.12                                    | 0.02                     | 0.66                     | 0.13                    | 5.4   |
| G030.540−00.096 | 30.540                          | −0.096                       | 30.538                   | −0.096                | 20                                | 13                                | 194                  | 37                           | 0.43                                    | 0.05                     | 1.44                     | 0.16                    | 12.4  |
| G030.551−00.080 | 30.551                          | −0.080                       | 30.550                   | −0.081                | 17                                | 16                                | 97                   | 33                           | 0.27                                    | 0.04                     | 1.10                     | 0.16                    | 8.0   |
| G030.552−00.041 | 30.552                          | −0.041                       | 30.551                   | −0.040                | 5                                 | 4                                 | 94                   | 11                           | 0.17                                    | 0.03                     | 0.25                     | 0.05                    | 5.2   |
| G030.554−00.004 | 30.554                          | −0.004                       | 30.551                   | −0.004                | 9                                 | 8                                 | 185                  | 20                           | 0.15                                    | 0.03                     | 0.45                     | 0.09                    | 5.4   |
| G030.557−00.021 | 30.557                          | −0.021                       | 30.560                   | −0.017                | 18                                | 9                                 | 147                  | 29                           | 0.22                                    | 0.04                     | 0.99                     | 0.17                    | 6.8   |
| G030.568+00.572 | 30.568                          | 0.572                        | 30.568                   | 0.574                 | 12                                | 8                                 | 117                  | 24                           | 0.16                                    | 0.03                     | 0.41                     | 0.08                    | 5.9   |
| G030.569−00.027 | 30.569                          | −0.027                       | 30.570                   | −0.026                | 15                                | 11                                | 181                  | 33                           | 0.65                                    | 0.06                     | 1.88                     | 0.17                    | 21.2  |

Table 2: Cont.

| Name            | $\ell_{\max}$<br>( $^{\circ}$ ) | $b_{\max}$<br>( $^{\circ}$ ) | $\ell$<br>( $^{\circ}$ ) | $b$<br>( $^{\circ}$ ) | $\sigma_{\text{maj}}$<br>( $''$ ) | $\sigma_{\text{min}}$<br>( $''$ ) | PA<br>( $^{\circ}$ ) | $R_{\text{eff}}$<br>( $''$ ) | $S_{\text{peak}}$<br>(Jy beam $^{-1}$ ) | $\Delta S_{\text{peak}}$ | $S_{\text{int}}$<br>(Jy) | $\Delta S_{\text{int}}$ | SNR   |
|-----------------|---------------------------------|------------------------------|--------------------------|-----------------------|-----------------------------------|-----------------------------------|----------------------|------------------------------|-----------------------------------------|--------------------------|--------------------------|-------------------------|-------|
| (1)             | (2)                             | (3)                          | (4)                      | (5)                   | (6)                               | (7)                               | (8)                  | (9)                          | (10)                                    | (11)                     | (12)                     | (13)                    | (14)  |
| G030.569−00.052 | 30.569                          | −0.052                       | 30.566                   | −0.053                | 15                                | 11                                | 180                  | 29                           | 0.38                                    | 0.05                     | 1.27                     | 0.15                    | 11.2  |
| G030.579−00.252 | 30.579                          | −0.252                       | 30.574                   | −0.250                | 33                                | 10                                | 206                  | 41                           | 0.22                                    | 0.04                     | 1.56                     | 0.27                    | 6.7   |
| G030.582−00.211 | 30.582                          | −0.211                       | 30.584                   | −0.213                | 17                                | 7                                 | 223                  | 25                           | 0.28                                    | 0.04                     | 0.76                     | 0.11                    | 7.8   |
| G030.583+00.126 | 30.583                          | 0.126                        | 30.579                   | 0.123                 | 31                                | 21                                | 115                  | 56                           | 0.31                                    | 0.03                     | 2.70                     | 0.30                    | 12.7  |
| G030.587+00.007 | 30.587                          | 0.007                        | 30.582                   | 0.003                 | 15                                | 8                                 | 131                  | 34                           | 0.19                                    | 0.03                     | 0.87                     | 0.15                    | 6.7   |
| G030.588−00.124 | 30.588                          | −0.124                       | 30.588                   | −0.123                | 8                                 | 6                                 | 109                  | 17                           | 0.38                                    | 0.05                     | 0.70                     | 0.09                    | 10.7  |
| G030.589−00.043 | 30.589                          | −0.043                       | 30.587                   | −0.044                | 23                                | 20                                | 174                  | 63                           | 3.73                                    | 0.30                     | 12.13                    | 0.98                    | 113.7 |
| G030.590−00.114 | 30.590                          | −0.114                       | 30.588                   | −0.113                | 22                                | 13                                | 198                  | 38                           | 0.31                                    | 0.04                     | 2.08                     | 0.29                    | 8.9   |
| G030.594−00.128 | 30.594                          | −0.128                       | 30.596                   | −0.125                | 13                                | 8                                 | 138                  | 23                           | 0.29                                    | 0.04                     | 0.86                     | 0.12                    | 8.5   |
| G030.595+00.163 | 30.595                          | 0.163                        | 30.594                   | 0.164                 | 12                                | 10                                | 217                  | 28                           | 0.46                                    | 0.04                     | 1.50                     | 0.14                    | 19.1  |
| G030.596−00.229 | 30.596                          | −0.229                       | 30.596                   | −0.230                | 11                                | 6                                 | 249                  | 21                           | 0.18                                    | 0.04                     | 0.46                     | 0.09                    | 5.5   |
| G030.601−00.106 | 30.601                          | −0.106                       | 30.602                   | −0.105                | 16                                | 8                                 | 149                  | 26                           | 0.41                                    | 0.05                     | 1.42                     | 0.17                    | 11.5  |
| G030.603+00.176 | 30.603                          | 0.176                        | 30.602                   | 0.177                 | 29                                | 19                                | 201                  | 67                           | 3.04                                    | 0.24                     | 14.32                    | 1.15                    | 115.6 |
| G030.609−00.111 | 30.609                          | −0.111                       | 30.609                   | −0.111                | 17                                | 11                                | 159                  | 30                           | 0.43                                    | 0.05                     | 2.18                     | 0.25                    | 12.5  |
| G030.614+00.237 | 30.614                          | 0.237                        | 30.615                   | 0.245                 | 31                                | 23                                | 199                  | 49                           | 0.24                                    | 0.04                     | 1.68                     | 0.26                    | 7.5   |
| G030.622+00.082 | 30.622                          | 0.082                        | 30.622                   | 0.090                 | 25                                | 13                                | 103                  | 40                           | 0.30                                    | 0.04                     | 1.20                     | 0.14                    | 11.4  |
| G030.624+00.169 | 30.624                          | 0.169                        | 30.626                   | 0.168                 | 19                                | 17                                | 144                  | 41                           | 0.46                                    | 0.05                     | 2.26                     | 0.22                    | 17.3  |
| G030.624+00.545 | 30.624                          | 0.545                        | 30.623                   | 0.546                 | 12                                | 10                                | 106                  | 30                           | 0.50                                    | 0.05                     | 1.19                     | 0.13                    | 14.3  |
| G030.624−00.110 | 30.624                          | −0.110                       | 30.625                   | −0.108                | 21                                | 19                                | 186                  | 46                           | 0.54                                    | 0.06                     | 3.26                     | 0.34                    | 15.4  |
| G030.628−00.029 | 30.628                          | −0.029                       | 30.627                   | −0.028                | 17                                | 11                                | 184                  | 30                           | 0.26                                    | 0.04                     | 1.25                     | 0.18                    | 8.2   |
| G030.628−00.063 | 30.628                          | −0.063                       | 30.625                   | −0.062                | 19                                | 13                                | 187                  | 39                           | 0.47                                    | 0.05                     | 2.38                     | 0.25                    | 14.2  |
| G030.633+00.083 | 30.633                          | 0.083                        | 30.635                   | 0.086                 | 21                                | 10                                | 164                  | 35                           | 0.33                                    | 0.04                     | 1.30                     | 0.15                    | 12.1  |
| G030.635+00.134 | 30.635                          | 0.134                        | 30.634                   | 0.141                 | 30                                | 14                                | 223                  | 40                           | 0.13                                    | 0.02                     | 0.86                     | 0.16                    | 5.9   |
| G030.636+00.275 | 30.636                          | 0.275                        | 30.636                   | 0.275                 | 8                                 | 5                                 | 221                  | 16                           | 0.19                                    | 0.03                     | 0.29                     | 0.05                    | 6.2   |
| G030.642−00.118 | 30.642                          | −0.118                       | 30.647                   | −0.119                | 24                                | 12                                | 201                  | 40                           | 0.50                                    | 0.05                     | 2.68                     | 0.29                    | 13.7  |
| G030.648+00.053 | 30.648                          | 0.053                        | 30.647                   | 0.054                 | 10                                | 9                                 | 166                  | 23                           | 0.12                                    | 0.02                     | 0.37                     | 0.07                    | 6.3   |
| G030.650−00.071 | 30.650                          | −0.071                       | 30.649                   | −0.070                | 9                                 | 8                                 | 115                  | 20                           | 0.15                                    | 0.03                     | 0.43                     | 0.08                    | 5.5   |
| G030.651−00.204 | 30.651                          | −0.204                       | 30.648                   | −0.202                | 23                                | 17                                | 208                  | 54                           | 1.82                                    | 0.15                     | 7.35                     | 0.61                    | 48.8  |
| G030.652−00.013 | 30.652                          | −0.013                       | 30.651                   | −0.013                | 8                                 | 6                                 | 238                  | 18                           | 0.24                                    | 0.04                     | 0.44                     | 0.07                    | 7.6   |
| G030.654+00.020 | 30.654                          | 0.020                        | 30.654                   | 0.019                 | 11                                | 7                                 | 242                  | 21                           | 0.20                                    | 0.03                     | 0.55                     | 0.08                    | 8.4   |
| G030.660+00.045 | 30.660                          | 0.045                        | 30.659                   | 0.043                 | 21                                | 13                                | 96                   | 41                           | 0.39                                    | 0.04                     | 2.06                     | 0.21                    | 16.8  |
| G030.660+00.229 | 30.660                          | 0.229                        | 30.658                   | 0.230                 | 15                                | 10                                | 202                  | 32                           | 0.69                                    | 0.07                     | 2.00                     | 0.20                    | 16.0  |
| G030.662+00.141 | 30.662                          | 0.141                        | 30.663                   | 0.145                 | 24                                | 12                                | 133                  | 38                           | 0.19                                    | 0.03                     | 1.01                     | 0.16                    | 7.0   |
| G030.662−00.138 | 30.662                          | −0.138                       | 30.663                   | −0.133                | 20                                | 11                                | 268                  | 34                           | 0.58                                    | 0.06                     | 1.98                     | 0.20                    | 15.8  |
| G030.662−00.144 | 30.662                          | −0.144                       | 30.663                   | −0.144                | 10                                | 7                                 | 172                  | 20                           | 0.65                                    | 0.06                     | 1.23                     | 0.12                    | 17.3  |
| G030.663+00.023 | 30.663                          | 0.023                        | 30.665                   | 0.023                 | 22                                | 14                                | 229                  | 38                           | 0.30                                    | 0.03                     | 1.83                     | 0.21                    | 12.1  |
| G030.664+00.061 | 30.664                          | 0.061                        | 30.662                   | 0.061                 | 12                                | 7                                 | 166                  | 21                           | 0.13                                    | 0.02                     | 0.36                     | 0.06                    | 6.8   |
| G030.664−00.421 | 30.664                          | −0.421                       | 30.665                   | −0.419                | 17                                | 11                                | 241                  | 31                           | 0.19                                    | 0.03                     | 0.91                     | 0.17                    | 6.1   |
| G030.665−00.028 | 30.665                          | −0.028                       | 30.665                   | −0.028                | 20                                | 14                                | 120                  | 39                           | 0.46                                    | 0.05                     | 2.62                     | 0.27                    | 16.0  |
| G030.667−00.332 | 30.667                          | −0.332                       | 30.663                   | −0.333                | 22                                | 8                                 | 152                  | 23                           | 0.34                                    | 0.05                     | 0.43                     | 0.06                    | 9.3   |
| G030.668−00.056 | 30.668                          | −0.056                       | 30.668                   | −0.056                | 9                                 | 7                                 | 165                  | 19                           | 0.23                                    | 0.03                     | 0.56                     | 0.07                    | 11.5  |
| G030.674+00.041 | 30.674                          | 0.041                        | 30.675                   | 0.044                 | 11                                | 8                                 | 147                  | 21                           | 0.13                                    | 0.02                     | 0.41                     | 0.06                    | 7.5   |
| G030.679+00.061 | 30.679                          | 0.061                        | 30.675                   | 0.065                 | 20                                | 9                                 | 231                  | 28                           | 0.20                                    | 0.03                     | 0.52                     | 0.07                    | 9.1   |
| G030.680−00.039 | 30.680                          | −0.039                       | 30.677                   | −0.040                | 19                                | 14                                | 103                  | 38                           | 1.29                                    | 0.11                     | 6.48                     | 0.54                    | 47.5  |
| G030.682−00.074 | 30.682                          | −0.074                       | 30.681                   | −0.073                | 18                                | 11                                | 169                  | 38                           | 2.35                                    | 0.19                     | 7.27                     | 0.59                    | 79.2  |
| G030.682−00.372 | 30.682                          | −0.372                       | 30.681                   | −0.372                | 11                                | 8                                 | 179                  | 25                           | 0.29                                    | 0.04                     | 0.74                     | 0.10                    | 9.4   |
| G030.685+00.053 | 30.685                          | 0.053                        | 30.687                   | 0.055                 | 18                                | 15                                | 230                  | 35                           | 0.21                                    | 0.03                     | 1.04                     | 0.14                    | 9.7   |
| G030.687−00.262 | 30.687                          | −0.262                       | 30.685                   | −0.263                | 20                                | 12                                | 95                   | 43                           | 1.52                                    | 0.13                     | 3.98                     | 0.33                    | 41.8  |
| G030.688−00.030 | 30.688                          | −0.030                       | 30.685                   | −0.029                | 22                                | 12                                | 218                  | 43                           | 1.60                                    | 0.13                     | 7.96                     | 0.65                    | 58.0  |
| G030.689+00.002 | 30.689                          | 0.002                        | 30.688                   | 0.004                 | 15                                | 7                                 | 98                   | 24                           | 0.17                                    | 0.03                     | 0.49                     | 0.09                    | 5.9   |
| G030.692+00.227 | 30.692                          | 0.227                        | 30.694                   | 0.228                 | 19                                | 11                                | 166                  | 36                           | 0.70                                    | 0.07                     | 1.78                     | 0.18                    | 16.6  |
| G030.692−00.043 | 30.692                          | −0.043                       | 30.690                   | −0.042                | 15                                | 11                                | 192                  | 29                           | 1.59                                    | 0.13                     | 6.78                     | 0.55                    | 58.1  |
| G030.693−00.149 | 30.693                          | −0.149                       | 30.688                   | −0.152                | 31                                | 12                                | 137                  | 40                           | 0.53                                    | 0.06                     | 2.02                     | 0.22                    | 14.3  |
| G030.693−00.365 | 30.693                          | −0.365                       | 30.694                   | −0.364                | 14                                | 8                                 | 153                  | 26                           | 0.31                                    | 0.04                     | 1.04                     | 0.13                    | 9.8   |
| G030.703−00.068 | 30.703                          | −0.068                       | 30.699                   | −0.064                | 28                                | 20                                | 213                  | 65                           | 11.36                                   | 0.91                     | 46.29                    | 3.71                    | 356.9 |
| G030.704+00.102 | 30.704                          | 0.102                        | 30.706                   | 0.111                 | 31                                | 21                                | 95                   | 60                           | 0.58                                    | 0.05                     | 5.89                     | 0.54                    | 22.6  |

Table 2: Cont.

| Name            | $\ell_{\max}$<br>( $^{\circ}$ ) | $b_{\max}$<br>( $^{\circ}$ ) | $\ell$<br>( $^{\circ}$ ) | $b$<br>( $^{\circ}$ ) | $\sigma_{\text{maj}}$<br>( $''$ ) | $\sigma_{\text{min}}$<br>( $''$ ) | PA<br>( $^{\circ}$ ) | $R_{\text{eff}}$<br>( $''$ ) | $S_{\text{peak}}$<br>(Jy beam $^{-1}$ ) | $\Delta S_{\text{peak}}$ | $S_{\text{int}}$<br>(Jy) | $\Delta S_{\text{int}}$ | SNR   |
|-----------------|---------------------------------|------------------------------|--------------------------|-----------------------|-----------------------------------|-----------------------------------|----------------------|------------------------------|-----------------------------------------|--------------------------|--------------------------|-------------------------|-------|
| (1)             | (2)                             | (3)                          | (4)                      | (5)                   | (6)                               | (7)                               | (8)                  | (9)                          | (10)                                    | (11)                     | (12)                     | (13)                    | (14)  |
| G030.706+00.038 | 30.706                          | 0.038                        | 30.706                   | 0.039                 | 11                                | 6                                 | 108                  | 19                           | 0.14                                    | 0.03                     | 0.36                     | 0.07                    | 5.7   |
| G030.707−00.366 | 30.707                          | −0.366                       | 30.705                   | −0.366                | 14                                | 12                                | 233                  | 32                           | 0.35                                    | 0.04                     | 1.30                     | 0.16                    | 11.0  |
| G030.708+00.075 | 30.708                          | 0.075                        | 30.711                   | 0.077                 | 20                                | 9                                 | 159                  | 26                           | 0.11                                    | 0.02                     | 0.37                     | 0.08                    | 5.1   |
| G030.712+00.138 | 30.712                          | 0.138                        | 30.712                   | 0.141                 | 18                                | 9                                 | 263                  | 29                           | 0.26                                    | 0.03                     | 1.07                     | 0.14                    | 10.2  |
| G030.713−00.046 | 30.713                          | −0.046                       | 30.711                   | −0.046                | 9                                 | 6                                 | 211                  | 18                           | 0.34                                    | 0.03                     | 0.61                     | 0.06                    | 17.0  |
| G030.713−00.074 | 30.713                          | −0.074                       | 30.712                   | −0.074                | 14                                | 7                                 | 139                  | 25                           | 3.14                                    | 0.25                     | 7.50                     | 0.60                    | 103.0 |
| G030.715+00.025 | 30.715                          | 0.025                        | 30.715                   | 0.024                 | 14                                | 7                                 | 127                  | 23                           | 0.19                                    | 0.03                     | 0.50                     | 0.08                    | 7.1   |
| G030.716+00.009 | 30.716                          | 0.009                        | 30.715                   | 0.008                 | 15                                | 6                                 | 97                   | 23                           | 0.19                                    | 0.03                     | 0.49                     | 0.09                    | 6.5   |
| G030.719−00.014 | 30.719                          | −0.014                       | 30.715                   | −0.012                | 19                                | 13                                | 171                  | 38                           | 0.51                                    | 0.05                     | 1.91                     | 0.19                    | 17.9  |
| G030.719−00.083 | 30.719                          | −0.083                       | 30.719                   | −0.084                | 21                                | 15                                | 245                  | 48                           | 6.71                                    | 0.54                     | 18.39                    | 1.47                    | 211.7 |
| G030.720+00.142 | 30.720                          | 0.142                        | 30.719                   | 0.144                 | 8                                 | 8                                 | 262                  | 18                           | 0.22                                    | 0.03                     | 0.47                     | 0.07                    | 8.2   |
| G030.721+00.057 | 30.721                          | 0.057                        | 30.723                   | 0.056                 | 21                                | 8                                 | 203                  | 31                           | 0.25                                    | 0.03                     | 0.68                     | 0.09                    | 9.5   |
| G030.721+00.153 | 30.721                          | 0.153                        | 30.716                   | 0.154                 | 16                                | 9                                 | 205                  | 28                           | 0.19                                    | 0.03                     | 0.77                     | 0.14                    | 6.3   |
| G030.722−00.098 | 30.722                          | −0.098                       | 30.722                   | −0.102                | 27                                | 16                                | 244                  | 43                           | 0.69                                    | 0.06                     | 2.04                     | 0.19                    | 23.0  |
| G030.725−00.029 | 30.725                          | −0.029                       | 30.726                   | −0.030                | 12                                | 10                                | 254                  | 25                           | 0.28                                    | 0.03                     | 0.86                     | 0.10                    | 11.5  |
| G030.732−00.080 | 30.732                          | −0.080                       | 30.732                   | −0.077                | 18                                | 15                                | 235                  | 39                           | 2.40                                    | 0.19                     | 10.87                    | 0.88                    | 80.6  |
| G030.734+00.112 | 30.734                          | 0.112                        | 30.737                   | 0.111                 | 28                                | 20                                | 211                  | 54                           | 0.44                                    | 0.04                     | 3.57                     | 0.36                    | 16.4  |
| G030.735−00.293 | 30.735                          | −0.293                       | 30.735                   | −0.293                | 6                                 | 4                                 | 101                  | 14                           | 0.21                                    | 0.04                     | 0.28                     | 0.05                    | 5.7   |
| G030.739−00.022 | 30.739                          | −0.022                       | 30.738                   | −0.022                | 9                                 | 6                                 | 187                  | 18                           | 0.38                                    | 0.04                     | 0.65                     | 0.07                    | 14.6  |
| G030.742−00.050 | 30.742                          | −0.050                       | 30.738                   | −0.047                | 19                                | 10                                | 175                  | 35                           | 1.69                                    | 0.14                     | 6.15                     | 0.50                    | 63.2  |
| G030.742−00.061 | 30.742                          | −0.061                       | 30.738                   | −0.062                | 30                                | 18                                | 188                  | 55                           | 3.69                                    | 0.30                     | 26.40                    | 2.12                    | 125.3 |
| G030.745+00.092 | 30.745                          | 0.092                        | 30.745                   | 0.094                 | 14                                | 7                                 | 244                  | 21                           | 0.15                                    | 0.03                     | 0.53                     | 0.09                    | 6.7   |
| G030.746−00.088 | 30.746                          | −0.088                       | 30.747                   | −0.087                | 9                                 | 6                                 | 218                  | 18                           | 0.30                                    | 0.03                     | 0.64                     | 0.07                    | 13.2  |
| G030.747−00.002 | 30.747                          | −0.002                       | 30.740                   | −0.003                | 26                                | 14                                | 164                  | 44                           | 0.90                                    | 0.08                     | 6.11                     | 0.52                    | 34.0  |
| G030.748−00.801 | 30.748                          | −0.801                       | 30.749                   | −0.798                | 17                                | 8                                 | 107                  | 25                           | 0.15                                    | 0.03                     | 0.56                     | 0.12                    | 5.1   |
| G030.750−00.027 | 30.750                          | −0.027                       | 30.747                   | −0.026                | 11                                | 10                                | 181                  | 27                           | 0.75                                    | 0.07                     | 2.31                     | 0.20                    | 28.5  |
| G030.752+00.016 | 30.752                          | 0.016                        | 30.752                   | 0.015                 | 39                                | 20                                | 175                  | 63                           | 0.68                                    | 0.06                     | 7.72                     | 0.68                    | 27.7  |
| G030.752−00.051 | 30.752                          | −0.051                       | 30.752                   | −0.051                | 20                                | 10                                | 253                  | 34                           | 3.90                                    | 0.31                     | 11.18                    | 0.90                    | 138.9 |
| G030.755+00.003 | 30.755                          | 0.003                        | 30.759                   | 0.003                 | 21                                | 13                                | 200                  | 38                           | 0.79                                    | 0.07                     | 3.91                     | 0.34                    | 30.5  |
| G030.755+00.111 | 30.755                          | 0.111                        | 30.754                   | 0.112                 | 14                                | 10                                | 235                  | 28                           | 0.36                                    | 0.04                     | 1.22                     | 0.14                    | 12.8  |
| G030.757+00.204 | 30.757                          | 0.204                        | 30.754                   | 0.205                 | 17                                | 15                                | 179                  | 41                           | 1.34                                    | 0.12                     | 4.12                     | 0.35                    | 31.8  |
| G030.760−00.053 | 30.760                          | −0.053                       | 30.761                   | −0.057                | 24                                | 11                                | 252                  | 38                           | 2.13                                    | 0.17                     | 6.01                     | 0.49                    | 79.8  |
| G030.761−00.781 | 30.761                          | −0.781                       | 30.762                   | −0.781                | 9                                 | 6                                 | 101                  | 18                           | 0.14                                    | 0.03                     | 0.37                     | 0.08                    | 5.0   |
| G030.762−00.222 | 30.762                          | −0.222                       | 30.762                   | −0.221                | 7                                 | 6                                 | 230                  | 17                           | 0.51                                    | 0.05                     | 0.77                     | 0.08                    | 15.5  |
| G030.763−00.030 | 30.763                          | −0.030                       | 30.761                   | −0.032                | 18                                | 14                                | 184                  | 39                           | 1.42                                    | 0.12                     | 6.09                     | 0.50                    | 53.8  |
| G030.764+00.209 | 30.764                          | 0.209                        | 30.764                   | 0.213                 | 28                                | 13                                | 242                  | 43                           | 0.82                                    | 0.08                     | 3.73                     | 0.35                    | 19.7  |
| G030.765+00.106 | 30.765                          | 0.106                        | 30.762                   | 0.102                 | 26                                | 13                                | 137                  | 41                           | 0.29                                    | 0.04                     | 1.70                     | 0.21                    | 10.2  |
| G030.767−00.045 | 30.767                          | −0.045                       | 30.769                   | −0.044                | 19                                | 11                                | 129                  | 33                           | 1.92                                    | 0.16                     | 6.26                     | 0.51                    | 72.9  |
| G030.767−00.104 | 30.767                          | −0.104                       | 30.768                   | −0.104                | 9                                 | 8                                 | 157                  | 21                           | 0.54                                    | 0.05                     | 0.90                     | 0.09                    | 18.2  |
| G030.769−00.118 | 30.769                          | −0.118                       | 30.769                   | −0.117                | 10                                | 7                                 | 265                  | 23                           | 0.34                                    | 0.04                     | 0.65                     | 0.08                    | 10.8  |
| G030.770−00.088 | 30.770                          | −0.088                       | 30.769                   | −0.086                | 13                                | 11                                | 128                  | 33                           | 0.97                                    | 0.08                     | 2.75                     | 0.23                    | 34.5  |
| G030.770−00.806 | 30.770                          | −0.806                       | 30.769                   | −0.803                | 19                                | 13                                | 171                  | 41                           | 0.90                                    | 0.08                     | 2.62                     | 0.23                    | 25.5  |
| G030.772−00.215 | 30.772                          | −0.215                       | 30.779                   | −0.215                | 38                                | 17                                | 157                  | 61                           | 1.72                                    | 0.14                     | 9.29                     | 0.77                    | 47.5  |
| G030.774+00.078 | 30.774                          | 0.078                        | 30.771                   | 0.080                 | 16                                | 8                                 | 225                  | 28                           | 0.21                                    | 0.03                     | 0.65                     | 0.09                    | 8.3   |
| G030.777−00.090 | 30.777                          | −0.090                       | 30.778                   | −0.092                | 15                                | 14                                | 191                  | 36                           | 0.76                                    | 0.07                     | 3.41                     | 0.30                    | 26.3  |
| G030.780+00.230 | 30.780                          | 0.230                        | 30.780                   | 0.230                 | 12                                | 10                                | 224                  | 27                           | 0.57                                    | 0.06                     | 1.10                     | 0.12                    | 14.0  |
| G030.782−00.045 | 30.782                          | −0.045                       | 30.781                   | −0.044                | 10                                | 8                                 | 198                  | 20                           | 1.02                                    | 0.09                     | 2.68                     | 0.22                    | 42.4  |
| G030.782−00.066 | 30.782                          | −0.066                       | 30.779                   | −0.069                | 18                                | 9                                 | 117                  | 24                           | 0.19                                    | 0.02                     | 0.61                     | 0.08                    | 9.8   |
| G030.783−00.054 | 30.783                          | −0.054                       | 30.782                   | −0.053                | 10                                | 8                                 | 213                  | 22                           | 1.27                                    | 0.10                     | 2.46                     | 0.20                    | 49.8  |
| G030.784+00.273 | 30.784                          | 0.273                        | 30.779                   | 0.277                 | 23                                | 16                                | 190                  | 41                           | 0.31                                    | 0.05                     | 1.66                     | 0.25                    | 7.8   |
| G030.784−00.262 | 30.784                          | −0.262                       | 30.784                   | −0.263                | 9                                 | 6                                 | 248                  | 18                           | 0.30                                    | 0.04                     | 0.57                     | 0.08                    | 8.1   |
| G030.785−00.021 | 30.785                          | −0.021                       | 30.785                   | −0.017                | 21                                | 18                                | 240                  | 48                           | 3.17                                    | 0.26                     | 15.15                    | 1.22                    | 121.5 |
| G030.785−00.028 | 30.785                          | −0.028                       | 30.787                   | −0.030                | 16                                | 12                                | 192                  | 32                           | 2.22                                    | 0.18                     | 10.51                    | 0.85                    | 87.5  |
| G030.786+00.203 | 30.786                          | 0.203                        | 30.786                   | 0.204                 | 16                                | 10                                | 167                  | 40                           | 3.02                                    | 0.24                     | 6.11                     | 0.50                    | 72.8  |
| G030.787+00.120 | 30.787                          | 0.120                        | 30.786                   | 0.120                 | 16                                | 8                                 | 144                  | 27                           | 0.18                                    | 0.03                     | 0.60                     | 0.11                    | 5.8   |
| G030.788−00.279 | 30.788                          | −0.279                       | 30.785                   | −0.279                | 19                                | 12                                | 134                  | 30                           | 0.21                                    | 0.04                     | 0.81                     | 0.14                    | 6.5   |

Table 2: Cont.

| Name            | $\ell_{\max}$<br>( $^{\circ}$ ) | $b_{\max}$<br>( $^{\circ}$ ) | $\ell$<br>( $^{\circ}$ ) | $b$<br>( $^{\circ}$ ) | $\sigma_{\text{maj}}$<br>( $''$ ) | $\sigma_{\text{min}}$<br>( $''$ ) | PA<br>( $^{\circ}$ ) | $R_{\text{eff}}$<br>( $''$ ) | $S_{\text{peak}}$<br>(Jy beam $^{-1}$ ) | $\Delta S_{\text{peak}}$ | $S_{\text{int}}$<br>(Jy) | $\Delta S_{\text{int}}$ | SNR   |
|-----------------|---------------------------------|------------------------------|--------------------------|-----------------------|-----------------------------------|-----------------------------------|----------------------|------------------------------|-----------------------------------------|--------------------------|--------------------------|-------------------------|-------|
| (1)             | (2)                             | (3)                          | (4)                      | (5)                   | (6)                               | (7)                               | (8)                  | (9)                          | (10)                                    | (11)                     | (12)                     | (13)                    | (14)  |
| G030.792−00.039 | 30.792                          | −0.039                       | 30.791                   | −0.042                | 17                                | 10                                | 119                  | 27                           | 1.35                                    | 0.11                     | 5.74                     | 0.47                    | 57.5  |
| G030.792−00.118 | 30.792                          | −0.118                       | 30.794                   | −0.116                | 20                                | 18                                | 264                  | 46                           | 0.43                                    | 0.04                     | 2.45                     | 0.26                    | 14.6  |
| G030.792−00.131 | 30.792                          | −0.131                       | 30.788                   | −0.133                | 21                                | 8                                 | 126                  | 28                           | 0.19                                    | 0.03                     | 0.72                     | 0.12                    | 6.7   |
| G030.795+00.017 | 30.795                          | 0.017                        | 30.796                   | 0.019                 | 19                                | 9                                 | 91                   | 31                           | 0.16                                    | 0.03                     | 0.65                     | 0.10                    | 7.4   |
| G030.797+00.071 | 30.797                          | 0.071                        | 30.795                   | 0.073                 | 19                                | 14                                | 184                  | 38                           | 0.37                                    | 0.04                     | 2.12                     | 0.22                    | 14.6  |
| G030.797−00.010 | 30.797                          | −0.010                       | 30.800                   | −0.006                | 21                                | 17                                | 132                  | 43                           | 1.02                                    | 0.09                     | 3.51                     | 0.29                    | 44.7  |
| G030.800+00.087 | 30.800                          | 0.087                        | 30.802                   | 0.089                 | 20                                | 11                                | 140                  | 34                           | 0.32                                    | 0.04                     | 1.17                     | 0.13                    | 13.0  |
| G030.800−00.032 | 30.800                          | −0.032                       | 30.799                   | −0.031                | 7                                 | 6                                 | 237                  | 15                           | 1.39                                    | 0.11                     | 3.47                     | 0.28                    | 59.4  |
| G030.801+00.065 | 30.801                          | 0.065                        | 30.800                   | 0.064                 | 11                                | 9                                 | 191                  | 23                           | 0.34                                    | 0.04                     | 0.96                     | 0.10                    | 13.4  |
| G030.801−00.024 | 30.801                          | −0.024                       | 30.799                   | −0.022                | 13                                | 11                                | 263                  | 25                           | 1.53                                    | 0.12                     | 6.27                     | 0.51                    | 64.5  |
| G030.807−00.033 | 30.807                          | −0.033                       | 30.807                   | −0.034                | 13                                | 11                                | 184                  | 27                           | 2.09                                    | 0.17                     | 6.84                     | 0.55                    | 85.8  |
| G030.807−00.073 | 30.807                          | −0.073                       | 30.808                   | −0.073                | 8                                 | 7                                 | 214                  | 20                           | 0.40                                    | 0.04                     | 0.70                     | 0.08                    | 14.0  |
| G030.809−00.203 | 30.809                          | −0.203                       | 30.811                   | −0.202                | 20                                | 12                                | 201                  | 35                           | 0.30                                    | 0.04                     | 1.50                     | 0.20                    | 9.3   |
| G030.810+00.190 | 30.810                          | 0.190                        | 30.810                   | 0.190                 | 9                                 | 8                                 | 105                  | 21                           | 0.27                                    | 0.05                     | 0.67                     | 0.11                    | 6.8   |
| G030.811−00.176 | 30.811                          | −0.176                       | 30.812                   | −0.176                | 17                                | 12                                | 269                  | 37                           | 0.65                                    | 0.06                     | 2.99                     | 0.28                    | 19.7  |
| G030.812−00.024 | 30.812                          | −0.024                       | 30.815                   | −0.025                | 20                                | 11                                | 203                  | 40                           | 2.57                                    | 0.21                     | 10.06                    | 0.81                    | 104.1 |
| G030.812−00.215 | 30.812                          | −0.215                       | 30.814                   | −0.218                | 18                                | 9                                 | 228                  | 29                           | 0.20                                    | 0.03                     | 0.78                     | 0.14                    | 6.4   |
| G030.814+00.078 | 30.814                          | 0.078                        | 30.813                   | 0.078                 | 17                                | 14                                | 160                  | 34                           | 0.26                                    | 0.03                     | 1.47                     | 0.18                    | 11.2  |
| G030.815+00.020 | 30.815                          | 0.020                        | 30.813                   | 0.022                 | 13                                | 7                                 | 222                  | 23                           | 0.15                                    | 0.03                     | 0.33                     | 0.07                    | 5.4   |
| G030.815−00.112 | 30.815                          | −0.112                       | 30.812                   | −0.111                | 16                                | 10                                | 205                  | 35                           | 0.65                                    | 0.06                     | 2.07                     | 0.19                    | 22.2  |
| G030.817−00.056 | 30.817                          | −0.056                       | 30.817                   | −0.056                | 38                                | 17                                | 207                  | 82                           | 22.60                                   | 1.81                     | 63.78                    | 5.10                    | 743.2 |
| G030.817−00.190 | 30.817                          | −0.190                       | 30.818                   | −0.191                | 12                                | 9                                 | 222                  | 24                           | 0.28                                    | 0.04                     | 0.87                     | 0.12                    | 8.5   |
| G030.819−00.081 | 30.819                          | −0.081                       | 30.818                   | −0.080                | 12                                | 7                                 | 136                  | 24                           | 0.60                                    | 0.06                     | 1.28                     | 0.12                    | 20.9  |
| G030.820+00.273 | 30.820                          | 0.273                        | 30.819                   | 0.275                 | 13                                | 11                                | 110                  | 33                           | 0.79                                    | 0.08                     | 2.14                     | 0.21                    | 18.7  |
| G030.822+00.059 | 30.822                          | 0.059                        | 30.817                   | 0.063                 | 23                                | 16                                | 203                  | 42                           | 0.81                                    | 0.07                     | 3.06                     | 0.26                    | 29.9  |
| G030.822+00.134 | 30.822                          | 0.134                        | 30.820                   | 0.135                 | 15                                | 9                                 | 167                  | 27                           | 0.35                                    | 0.04                     | 0.94                     | 0.12                    | 10.7  |
| G030.822−00.168 | 30.822                          | −0.168                       | 30.823                   | −0.169                | 19                                | 11                                | 210                  | 35                           | 0.65                                    | 0.06                     | 2.57                     | 0.24                    | 20.0  |
| G030.823−00.156 | 30.823                          | −0.156                       | 30.826                   | −0.156                | 22                                | 17                                | 221                  | 48                           | 0.86                                    | 0.08                     | 4.94                     | 0.44                    | 25.7  |
| G030.827−00.123 | 30.827                          | −0.123                       | 30.827                   | −0.122                | 13                                | 7                                 | 264                  | 27                           | 0.50                                    | 0.05                     | 1.03                     | 0.10                    | 16.3  |
| G030.828+00.052 | 30.828                          | 0.052                        | 30.828                   | 0.054                 | 11                                | 9                                 | 166                  | 24                           | 0.32                                    | 0.04                     | 0.86                     | 0.10                    | 12.3  |
| G030.828+00.204 | 30.828                          | 0.204                        | 30.828                   | 0.205                 | 10                                | 6                                 | 184                  | 20                           | 0.40                                    | 0.05                     | 0.83                     | 0.11                    | 9.4   |
| G030.830+00.133 | 30.830                          | 0.133                        | 30.830                   | 0.134                 | 12                                | 8                                 | 156                  | 24                           | 0.32                                    | 0.04                     | 0.87                     | 0.11                    | 9.5   |
| G030.831−00.098 | 30.831                          | −0.098                       | 30.832                   | −0.097                | 14                                | 6                                 | 137                  | 22                           | 0.19                                    | 0.03                     | 0.60                     | 0.10                    | 6.8   |
| G030.840+00.121 | 30.840                          | 0.121                        | 30.839                   | 0.122                 | 11                                | 9                                 | 171                  | 26                           | 0.33                                    | 0.04                     | 0.96                     | 0.12                    | 10.5  |
| G030.841−00.021 | 30.841                          | −0.021                       | 30.844                   | −0.022                | 23                                | 11                                | 199                  | 40                           | 0.82                                    | 0.07                     | 3.11                     | 0.27                    | 33.0  |
| G030.842−00.045 | 30.842                          | −0.045                       | 30.841                   | −0.044                | 5                                 | 4                                 | 101                  | 11                           | 0.08                                    | 0.01                     | 0.14                     | 0.02                    | 7.0   |
| G030.843−00.013 | 30.843                          | −0.013                       | 30.843                   | −0.011                | 17                                | 10                                | 185                  | 31                           | 0.46                                    | 0.04                     | 1.48                     | 0.14                    | 19.1  |
| G030.846+00.177 | 30.846                          | 0.177                        | 30.845                   | 0.181                 | 28                                | 10                                | 93                   | 38                           | 0.46                                    | 0.06                     | 2.04                     | 0.26                    | 10.2  |
| G030.847−00.082 | 30.847                          | −0.082                       | 30.847                   | −0.082                | 18                                | 14                                | 236                  | 42                           | 1.49                                    | 0.12                     | 6.61                     | 0.54                    | 53.5  |
| G030.847−00.102 | 30.847                          | −0.102                       | 30.846                   | −0.100                | 14                                | 12                                | 103                  | 32                           | 0.82                                    | 0.07                     | 2.88                     | 0.25                    | 28.0  |
| G030.850+00.006 | 30.850                          | 0.006                        | 30.843                   | 0.008                 | 23                                | 14                                | 199                  | 39                           | 0.15                                    | 0.03                     | 1.04                     | 0.18                    | 6.6   |
| G030.853−00.109 | 30.853                          | −0.109                       | 30.854                   | −0.108                | 18                                | 11                                | 154                  | 35                           | 0.86                                    | 0.07                     | 2.64                     | 0.23                    | 29.3  |
| G030.855+00.148 | 30.855                          | 0.148                        | 30.855                   | 0.147                 | 23                                | 14                                | 185                  | 41                           | 0.78                                    | 0.08                     | 3.59                     | 0.35                    | 17.5  |
| G030.855−00.151 | 30.855                          | −0.151                       | 30.855                   | −0.151                | 11                                | 9                                 | 125                  | 22                           | 0.21                                    | 0.03                     | 0.65                     | 0.10                    | 7.2   |
| G030.856−00.161 | 30.856                          | −0.161                       | 30.853                   | −0.160                | 16                                | 10                                | 191                  | 29                           | 0.29                                    | 0.04                     | 0.94                     | 0.13                    | 9.3   |
| G030.858−00.001 | 30.858                          | −0.001                       | 30.858                   | 0.000                 | 16                                | 7                                 | 166                  | 24                           | 0.15                                    | 0.02                     | 0.41                     | 0.06                    | 7.4   |
| G030.859+00.199 | 30.859                          | 0.199                        | 30.860                   | 0.199                 | 10                                | 7                                 | 140                  | 21                           | 0.26                                    | 0.05                     | 0.59                     | 0.10                    | 6.4   |
| G030.860−00.083 | 30.860                          | −0.083                       | 30.860                   | −0.083                | 11                                | 10                                | 198                  | 26                           | 0.46                                    | 0.05                     | 1.27                     | 0.13                    | 16.4  |
| G030.862+00.036 | 30.862                          | 0.036                        | 30.859                   | 0.041                 | 21                                | 10                                | 231                  | 34                           | 0.42                                    | 0.04                     | 1.71                     | 0.18                    | 14.5  |
| G030.863−00.039 | 30.863                          | −0.039                       | 30.864                   | −0.041                | 25                                | 15                                | 268                  | 45                           | 0.59                                    | 0.05                     | 2.18                     | 0.19                    | 25.4  |
| G030.865−00.158 | 30.865                          | −0.158                       | 30.866                   | −0.155                | 15                                | 13                                | 197                  | 32                           | 0.31                                    | 0.04                     | 1.29                     | 0.17                    | 9.7   |
| G030.866+00.113 | 30.866                          | 0.113                        | 30.867                   | 0.114                 | 18                                | 13                                | 173                  | 48                           | 2.73                                    | 0.22                     | 6.82                     | 0.55                    | 82.9  |
| G030.866−00.120 | 30.866                          | −0.120                       | 30.868                   | −0.120                | 19                                | 15                                | 262                  | 41                           | 0.58                                    | 0.05                     | 2.86                     | 0.27                    | 19.9  |
| G030.872+00.144 | 30.872                          | 0.144                        | 30.872                   | 0.145                 | 11                                | 9                                 | 105                  | 23                           | 0.43                                    | 0.06                     | 1.29                     | 0.17                    | 9.8   |
| G030.874+00.168 | 30.874                          | 0.168                        | 30.874                   | 0.169                 | 5                                 | 5                                 | 95                   | 15                           | 0.46                                    | 0.06                     | 0.62                     | 0.08                    | 10.2  |
| G030.874−00.095 | 30.874                          | −0.095                       | 30.877                   | −0.094                | 29                                | 12                                | 163                  | 46                           | 0.84                                    | 0.07                     | 2.45                     | 0.21                    | 30.2  |

Table 2: Cont.

| Name            | $\ell_{\max}$<br>( $^{\circ}$ ) | $b_{\max}$<br>( $^{\circ}$ ) | $\ell$<br>( $^{\circ}$ ) | $b$<br>( $^{\circ}$ ) | $\sigma_{\text{maj}}$<br>( $''$ ) | $\sigma_{\text{min}}$<br>( $''$ ) | PA<br>( $^{\circ}$ ) | $R_{\text{eff}}$<br>( $''$ ) | $S_{\text{peak}}$<br>(Jy beam $^{-1}$ ) | $\Delta S_{\text{peak}}$ | $S_{\text{int}}$<br>(Jy) | $\Delta S_{\text{int}}$ | SNR  |
|-----------------|---------------------------------|------------------------------|--------------------------|-----------------------|-----------------------------------|-----------------------------------|----------------------|------------------------------|-----------------------------------------|--------------------------|--------------------------|-------------------------|------|
| (1)             | (2)                             | (3)                          | (4)                      | (5)                   | (6)                               | (7)                               | (8)                  | (9)                          | (10)                                    | (11)                     | (12)                     | (13)                    | (14) |
| G030.875−00.021 | 30.875                          | −0.021                       | 30.874                   | −0.020                | 17                                | 9                                 | 119                  | 31                           | 0.33                                    | 0.03                     | 1.10                     | 0.12                    | 14.5 |
| G030.875−00.134 | 30.875                          | −0.134                       | 30.870                   | −0.135                | 29                                | 11                                | 155                  | 40                           | 0.34                                    | 0.04                     | 2.03                     | 0.24                    | 11.4 |
| G030.876+00.058 | 30.876                          | 0.058                        | 30.874                   | 0.055                 | 28                                | 18                                | 132                  | 55                           | 1.13                                    | 0.10                     | 5.91                     | 0.50                    | 37.9 |
| G030.881−00.250 | 30.881                          | −0.250                       | 30.876                   | −0.252                | 42                                | 13                                | 135                  | 44                           | 0.13                                    | 0.03                     | 1.06                     | 0.23                    | 5.0  |
| G030.885+00.152 | 30.885                          | 0.152                        | 30.884                   | 0.155                 | 16                                | 12                                | 231                  | 31                           | 0.49                                    | 0.06                     | 1.73                     | 0.20                    | 11.8 |
| G030.887−00.232 | 30.887                          | −0.232                       | 30.887                   | −0.231                | 10                                | 8                                 | 215                  | 20                           | 0.16                                    | 0.03                     | 0.47                     | 0.09                    | 5.8  |
| G030.888+00.042 | 30.888                          | 0.042                        | 30.888                   | 0.045                 | 11                                | 10                                | 106                  | 24                           | 0.23                                    | 0.03                     | 0.73                     | 0.10                    | 8.5  |
| G030.891+00.029 | 30.891                          | 0.029                        | 30.892                   | 0.033                 | 16                                | 8                                 | 122                  | 26                           | 0.20                                    | 0.03                     | 0.61                     | 0.10                    | 7.4  |
| G030.894+00.138 | 30.894                          | 0.138                        | 30.896                   | 0.137                 | 32                                | 11                                | 199                  | 50                           | 1.35                                    | 0.12                     | 6.60                     | 0.57                    | 31.4 |
| G030.895−00.240 | 30.895                          | −0.240                       | 30.894                   | −0.240                | 12                                | 10                                | 224                  | 24                           | 0.15                                    | 0.03                     | 0.53                     | 0.11                    | 5.3  |
| G030.896−00.068 | 30.896                          | −0.068                       | 30.897                   | −0.066                | 13                                | 9                                 | 128                  | 26                           | 0.15                                    | 0.03                     | 0.45                     | 0.08                    | 6.2  |
| G030.898+00.161 | 30.898                          | 0.161                        | 30.898                   | 0.165                 | 23                                | 12                                | 119                  | 44                           | 1.91                                    | 0.16                     | 4.71                     | 0.39                    | 44.1 |
| G030.899−00.009 | 30.899                          | −0.009                       | 30.898                   | −0.010                | 14                                | 10                                | 167                  | 29                           | 0.16                                    | 0.03                     | 0.68                     | 0.12                    | 6.5  |
| G030.900+00.379 | 30.900                          | 0.379                        | 30.900                   | 0.380                 | 13                                | 10                                | 137                  | 25                           | 0.19                                    | 0.04                     | 0.62                     | 0.11                    | 6.0  |
| G030.900−00.230 | 30.900                          | −0.230                       | 30.897                   | −0.228                | 14                                | 8                                 | 236                  | 23                           | 0.20                                    | 0.04                     | 0.56                     | 0.10                    | 6.4  |
| G030.901−00.035 | 30.901                          | −0.035                       | 30.902                   | −0.032                | 16                                | 12                                | 134                  | 35                           | 0.49                                    | 0.05                     | 1.35                     | 0.13                    | 19.0 |
| G030.904+00.148 | 30.904                          | 0.148                        | 30.903                   | 0.148                 | 8                                 | 6                                 | 107                  | 17                           | 0.45                                    | 0.05                     | 0.75                     | 0.09                    | 11.1 |
| G030.912+00.021 | 30.912                          | 0.021                        | 30.909                   | 0.026                 | 19                                | 13                                | 217                  | 36                           | 0.23                                    | 0.03                     | 1.15                     | 0.17                    | 8.3  |
| G030.914+00.720 | 30.914                          | 0.720                        | 30.914                   | 0.720                 | 21                                | 14                                | 267                  | 39                           | 0.47                                    | 0.06                     | 1.79                     | 0.21                    | 11.3 |
| G030.920+00.090 | 30.920                          | 0.090                        | 30.921                   | 0.092                 | 18                                | 11                                | 124                  | 38                           | 1.02                                    | 0.09                     | 3.20                     | 0.29                    | 24.1 |
| G030.926−00.096 | 30.926                          | −0.096                       | 30.923                   | −0.097                | 19                                | 9                                 | 172                  | 30                           | 0.12                                    | 0.02                     | 0.57                     | 0.12                    | 5.2  |
| G030.936−00.052 | 30.936                          | −0.052                       | 30.936                   | −0.051                | 11                                | 8                                 | 221                  | 23                           | 0.13                                    | 0.02                     | 0.39                     | 0.07                    | 6.2  |
| G030.936−00.170 | 30.936                          | −0.170                       | 30.932                   | −0.170                | 18                                | 11                                | 185                  | 32                           | 0.13                                    | 0.03                     | 0.70                     | 0.14                    | 5.5  |
| G030.941−00.284 | 30.941                          | −0.284                       | 30.934                   | −0.286                | 22                                | 9                                 | 149                  | 31                           | 0.12                                    | 0.03                     | 0.70                     | 0.14                    | 5.3  |
| G030.943−00.276 | 30.943                          | −0.276                       | 30.944                   | −0.273                | 39                                | 15                                | 229                  | 44                           | 0.12                                    | 0.03                     | 1.11                     | 0.23                    | 5.2  |
| G030.945+00.035 | 30.945                          | 0.035                        | 30.944                   | 0.035                 | 7                                 | 6                                 | 141                  | 19                           | 0.75                                    | 0.07                     | 0.82                     | 0.07                    | 24.2 |
| G030.945+00.159 | 30.945                          | 0.159                        | 30.945                   | 0.159                 | 6                                 | 6                                 | 124                  | 16                           | 0.26                                    | 0.05                     | 0.43                     | 0.08                    | 6.0  |
| G030.947−00.081 | 30.947                          | −0.081                       | 30.946                   | −0.076                | 14                                | 9                                 | 247                  | 26                           | 0.16                                    | 0.02                     | 0.63                     | 0.10                    | 7.3  |
| G030.948−00.064 | 30.948                          | −0.064                       | 30.946                   | −0.063                | 16                                | 10                                | 200                  | 29                           | 0.19                                    | 0.03                     | 0.83                     | 0.11                    | 9.0  |
| G030.957−00.071 | 30.957                          | −0.071                       | 30.956                   | −0.070                | 10                                | 6                                 | 192                  | 18                           | 0.15                                    | 0.02                     | 0.37                     | 0.06                    | 7.3  |
| G030.959+00.086 | 30.959                          | 0.086                        | 30.958                   | 0.084                 | 20                                | 16                                | 172                  | 48                           | 1.54                                    | 0.13                     | 4.98                     | 0.42                    | 36.4 |
| G030.965−00.055 | 30.965                          | −0.055                       | 30.964                   | −0.055                | 10                                | 9                                 | 125                  | 26                           | 0.42                                    | 0.04                     | 0.84                     | 0.09                    | 15.7 |
| G030.969−00.045 | 30.969                          | −0.045                       | 30.968                   | −0.044                | 13                                | 10                                | 110                  | 30                           | 0.40                                    | 0.04                     | 0.95                     | 0.10                    | 14.1 |
| G030.969−00.132 | 30.969                          | −0.132                       | 30.966                   | −0.130                | 21                                | 15                                | 169                  | 40                           | 0.47                                    | 0.04                     | 1.50                     | 0.14                    | 18.8 |
| G030.972+00.562 | 30.972                          | 0.562                        | 30.972                   | 0.562                 | 7                                 | 6                                 | 251                  | 17                           | 0.55                                    | 0.06                     | 0.77                     | 0.09                    | 11.9 |
| G030.973−00.142 | 30.973                          | −0.142                       | 30.975                   | −0.142                | 24                                | 20                                | 151                  | 57                           | 1.51                                    | 0.12                     | 5.58                     | 0.46                    | 57.3 |
| G030.978+00.215 | 30.978                          | 0.215                        | 30.979                   | 0.217                 | 25                                | 13                                | 119                  | 46                           | 0.94                                    | 0.09                     | 4.14                     | 0.38                    | 21.4 |
| G030.987−00.217 | 30.987                          | −0.217                       | 30.988                   | −0.218                | 9                                 | 7                                 | 210                  | 21                           | 0.30                                    | 0.04                     | 0.51                     | 0.06                    | 11.3 |
| G030.995+00.122 | 30.995                          | 0.122                        | 30.993                   | 0.121                 | 33                                | 14                                | 190                  | 39                           | 0.21                                    | 0.04                     | 1.25                     | 0.25                    | 5.5  |
| G030.995+00.234 | 30.995                          | 0.234                        | 30.995                   | 0.233                 | 21                                | 11                                | 114                  | 37                           | 0.45                                    | 0.05                     | 2.24                     | 0.27                    | 11.5 |
| G030.995−00.135 | 30.995                          | −0.135                       | 30.995                   | −0.136                | 11                                | 10                                | 100                  | 24                           | 0.19                                    | 0.03                     | 0.51                     | 0.08                    | 8.0  |
| G030.997−00.076 | 30.997                          | −0.076                       | 30.998                   | −0.077                | 22                                | 15                                | 190                  | 51                           | 1.28                                    | 0.11                     | 3.70                     | 0.31                    | 49.9 |
| G031.000+00.379 | 31.000                          | 0.379                        | 31.001                   | 0.377                 | 15                                | 8                                 | 238                  | 25                           | 0.33                                    | 0.05                     | 1.04                     | 0.15                    | 8.1  |
| G031.009+00.360 | 31.009                          | 0.360                        | 31.005                   | 0.364                 | 27                                | 13                                | 208                  | 43                           | 0.42                                    | 0.05                     | 2.84                     | 0.33                    | 11.6 |
| G031.010−00.143 | 31.010                          | −0.143                       | 31.006                   | −0.143                | 20                                | 9                                 | 128                  | 30                           | 0.15                                    | 0.03                     | 0.74                     | 0.13                    | 6.4  |
| G031.014−00.002 | 31.014                          | −0.002                       | 31.013                   | −0.010                | 40                                | 12                                | 268                  | 41                           | 0.19                                    | 0.04                     | 1.12                     | 0.23                    | 5.2  |
| G031.016+00.778 | 31.016                          | 0.778                        | 31.011                   | 0.777                 | 23                                | 7                                 | 178                  | 28                           | 0.24                                    | 0.04                     | 0.81                     | 0.15                    | 6.0  |
| G031.017−00.123 | 31.017                          | −0.123                       | 31.015                   | −0.120                | 21                                | 8                                 | 229                  | 26                           | 0.14                                    | 0.03                     | 0.43                     | 0.08                    | 6.1  |
| G031.021+00.248 | 31.021                          | 0.248                        | 31.020                   | 0.249                 | 23                                | 9                                 | 222                  | 30                           | 0.22                                    | 0.03                     | 1.13                     | 0.17                    | 7.6  |
| G031.021−00.088 | 31.021                          | −0.088                       | 31.020                   | −0.086                | 10                                | 8                                 | 228                  | 20                           | 0.12                                    | 0.02                     | 0.35                     | 0.07                    | 5.4  |
| G031.024−00.112 | 31.024                          | −0.112                       | 31.025                   | −0.112                | 15                                | 10                                | 155                  | 31                           | 0.34                                    | 0.04                     | 1.14                     | 0.12                    | 13.7 |
| G031.025+00.262 | 31.025                          | 0.262                        | 31.027                   | 0.264                 | 17                                | 11                                | 160                  | 33                           | 0.46                                    | 0.05                     | 2.11                     | 0.24                    | 12.4 |
| G031.026+00.369 | 31.026                          | 0.369                        | 31.023                   | 0.371                 | 12                                | 7                                 | 205                  | 20                           | 0.18                                    | 0.03                     | 0.48                     | 0.09                    | 6.0  |
| G031.030+00.785 | 31.030                          | 0.785                        | 31.030                   | 0.785                 | 9                                 | 7                                 | 253                  | 18                           | 0.18                                    | 0.04                     | 0.44                     | 0.09                    | 5.0  |
| G031.042+00.081 | 31.042                          | 0.081                        | 31.041                   | 0.072                 | 31                                | 18                                | 264                  | 39                           | 0.25                                    | 0.05                     | 1.20                     | 0.24                    | 5.5  |
| G031.043+00.344 | 31.043                          | 0.344                        | 31.044                   | 0.343                 | 37                                | 11                                | 161                  | 40                           | 0.22                                    | 0.03                     | 1.54                     | 0.25                    | 7.2  |

Table 2: Cont.

| Name            | $\ell_{\max}$<br>( $^{\circ}$ ) | $b_{\max}$<br>( $^{\circ}$ ) | $\ell$<br>( $^{\circ}$ ) | $b$<br>( $^{\circ}$ ) | $\sigma_{\text{maj}}$<br>( $''$ ) | $\sigma_{\text{min}}$<br>( $''$ ) | PA<br>( $^{\circ}$ ) | $R_{\text{eff}}$<br>( $''$ ) | $S_{\text{peak}}$<br>(Jy beam $^{-1}$ ) | $\Delta S_{\text{peak}}$ | $S_{\text{int}}$<br>(Jy) | $\Delta S_{\text{int}}$ | SNR   |
|-----------------|---------------------------------|------------------------------|--------------------------|-----------------------|-----------------------------------|-----------------------------------|----------------------|------------------------------|-----------------------------------------|--------------------------|--------------------------|-------------------------|-------|
| (1)             | (2)                             | (3)                          | (4)                      | (5)                   | (6)                               | (7)                               | (8)                  | (9)                          | (10)                                    | (11)                     | (12)                     | (13)                    | (14)  |
| G031.045+00.249 | 31.045                          | 0.249                        | 31.041                   | 0.245                 | 20                                | 10                                | 135                  | 32                           | 0.44                                    | 0.05                     | 1.73                     | 0.20                    | 11.5  |
| G031.045+00.260 | 31.045                          | 0.260                        | 31.044                   | 0.261                 | 14                                | 9                                 | 252                  | 29                           | 0.71                                    | 0.07                     | 2.24                     | 0.22                    | 17.4  |
| G031.047+00.274 | 31.047                          | 0.274                        | 31.043                   | 0.281                 | 28                                | 10                                | 262                  | 37                           | 0.28                                    | 0.04                     | 1.90                     | 0.30                    | 7.5   |
| G031.047+00.358 | 31.047                          | 0.358                        | 31.046                   | 0.359                 | 16                                | 12                                | 142                  | 38                           | 1.14                                    | 0.10                     | 3.52                     | 0.31                    | 28.0  |
| G031.049+00.021 | 31.049                          | 0.021                        | 31.043                   | 0.024                 | 17                                | 12                                | 215                  | 32                           | 0.27                                    | 0.04                     | 1.34                     | 0.22                    | 6.9   |
| G031.059+00.093 | 31.059                          | 0.093                        | 31.059                   | 0.094                 | 9                                 | 7                                 | 252                  | 22                           | 0.74                                    | 0.07                     | 1.08                     | 0.11                    | 17.5  |
| G031.059−00.537 | 31.059                          | −0.537                       | 31.057                   | −0.537                | 15                                | 8                                 | 159                  | 27                           | 0.17                                    | 0.03                     | 0.50                     | 0.08                    | 7.5   |
| G031.065+00.221 | 31.065                          | 0.221                        | 31.064                   | 0.222                 | 10                                | 8                                 | 270                  | 23                           | 0.35                                    | 0.05                     | 0.97                     | 0.14                    | 8.3   |
| G031.070+00.050 | 31.070                          | 0.050                        | 31.071                   | 0.050                 | 16                                | 10                                | 139                  | 34                           | 0.47                                    | 0.06                     | 1.78                     | 0.21                    | 11.4  |
| G031.070+00.774 | 31.070                          | 0.774                        | 31.072                   | 0.775                 | 12                                | 8                                 | 163                  | 24                           | 0.20                                    | 0.04                     | 0.52                     | 0.11                    | 5.1   |
| G031.072+00.244 | 31.072                          | 0.244                        | 31.072                   | 0.245                 | 10                                | 7                                 | 116                  | 21                           | 0.28                                    | 0.05                     | 0.63                     | 0.11                    | 6.5   |
| G031.075+00.221 | 31.075                          | 0.221                        | 31.075                   | 0.223                 | 16                                | 11                                | 225                  | 33                           | 0.28                                    | 0.05                     | 1.56                     | 0.25                    | 7.0   |
| G031.076+00.457 | 31.076                          | 0.457                        | 31.079                   | 0.462                 | 25                                | 15                                | 137                  | 47                           | 1.11                                    | 0.10                     | 4.43                     | 0.39                    | 25.8  |
| G031.077−00.106 | 31.077                          | −0.106                       | 31.075                   | −0.106                | 9                                 | 8                                 | 116                  | 21                           | 0.21                                    | 0.03                     | 0.44                     | 0.06                    | 8.6   |
| G031.082+00.200 | 31.082                          | 0.200                        | 31.086                   | 0.205                 | 20                                | 12                                | 126                  | 33                           | 0.24                                    | 0.04                     | 1.16                     | 0.21                    | 6.2   |
| G031.083+00.083 | 31.083                          | 0.083                        | 31.095                   | 0.079                 | 36                                | 23                                | 216                  | 48                           | 0.20                                    | 0.04                     | 2.24                     | 0.48                    | 5.1   |
| G031.087+00.448 | 31.087                          | 0.448                        | 31.087                   | 0.448                 | 19                                | 8                                 | 222                  | 28                           | 0.30                                    | 0.05                     | 0.94                     | 0.14                    | 8.0   |
| G031.096+00.110 | 31.096                          | 0.110                        | 31.096                   | 0.111                 | 8                                 | 7                                 | 125                  | 20                           | 0.46                                    | 0.06                     | 0.75                     | 0.09                    | 10.7  |
| G031.101+00.264 | 31.101                          | 0.264                        | 31.102                   | 0.263                 | 15                                | 7                                 | 261                  | 24                           | 0.26                                    | 0.05                     | 0.74                     | 0.14                    | 5.6   |
| G031.109−00.121 | 31.109                          | −0.121                       | 31.109                   | −0.119                | 11                                | 8                                 | 101                  | 23                           | 0.16                                    | 0.03                     | 0.46                     | 0.08                    | 6.6   |
| G031.121+00.026 | 31.121                          | 0.026                        | 31.121                   | 0.025                 | 8                                 | 7                                 | 246                  | 22                           | 0.66                                    | 0.06                     | 0.99                     | 0.09                    | 20.6  |
| G031.121+00.062 | 31.121                          | 0.062                        | 31.120                   | 0.064                 | 16                                | 9                                 | 217                  | 29                           | 0.44                                    | 0.05                     | 1.07                     | 0.12                    | 13.2  |
| G031.137−00.288 | 31.137                          | −0.288                       | 31.137                   | −0.288                | 18                                | 13                                | 188                  | 32                           | 0.17                                    | 0.03                     | 0.68                     | 0.12                    | 6.2   |
| G031.140+00.015 | 31.140                          | 0.015                        | 31.140                   | 0.014                 | 14                                | 9                                 | 114                  | 27                           | 0.16                                    | 0.03                     | 0.63                     | 0.12                    | 5.7   |
| G031.140−00.193 | 31.140                          | −0.193                       | 31.134                   | −0.193                | 34                                | 16                                | 190                  | 50                           | 0.17                                    | 0.03                     | 1.81                     | 0.30                    | 6.8   |
| G031.148−00.268 | 31.148                          | −0.268                       | 31.146                   | −0.268                | 12                                | 8                                 | 130                  | 23                           | 0.13                                    | 0.03                     | 0.37                     | 0.08                    | 5.0   |
| G031.149−00.150 | 31.149                          | −0.150                       | 31.147                   | −0.149                | 15                                | 12                                | 189                  | 34                           | 0.35                                    | 0.04                     | 1.39                     | 0.16                    | 12.6  |
| G031.150+00.264 | 31.150                          | 0.264                        | 31.148                   | 0.264                 | 30                                | 15                                | 113                  | 48                           | 0.63                                    | 0.07                     | 3.53                     | 0.37                    | 14.9  |
| G031.159+00.046 | 31.159                          | 0.046                        | 31.158                   | 0.048                 | 20                                | 19                                | 264                  | 56                           | 1.26                                    | 0.11                     | 4.33                     | 0.36                    | 39.4  |
| G031.160−00.128 | 31.160                          | −0.128                       | 31.159                   | −0.128                | 9                                 | 5                                 | 105                  | 17                           | 0.13                                    | 0.03                     | 0.24                     | 0.05                    | 5.4   |
| G031.162−00.155 | 31.162                          | −0.155                       | 31.160                   | −0.152                | 16                                | 11                                | 94                   | 31                           | 0.23                                    | 0.03                     | 1.10                     | 0.15                    | 9.3   |
| G031.164−00.032 | 31.164                          | −0.032                       | 31.163                   | −0.032                | 10                                | 6                                 | 154                  | 19                           | 0.18                                    | 0.03                     | 0.33                     | 0.05                    | 7.0   |
| G031.173−00.139 | 31.173                          | −0.139                       | 31.174                   | −0.139                | 13                                | 10                                | 139                  | 29                           | 0.33                                    | 0.04                     | 0.96                     | 0.11                    | 12.8  |
| G031.182−00.147 | 31.182                          | −0.147                       | 31.182                   | −0.147                | 13                                | 11                                | 102                  | 31                           | 0.47                                    | 0.05                     | 1.25                     | 0.12                    | 18.1  |
| G031.204−00.153 | 31.204                          | −0.153                       | 31.202                   | −0.152                | 12                                | 7                                 | 169                  | 22                           | 0.13                                    | 0.02                     | 0.40                     | 0.08                    | 5.6   |
| G031.208+00.101 | 31.208                          | 0.101                        | 31.206                   | 0.100                 | 21                                | 12                                | 108                  | 41                           | 0.38                                    | 0.04                     | 1.49                     | 0.17                    | 11.9  |
| G031.220+00.019 | 31.220                          | 0.019                        | 31.223                   | 0.022                 | 18                                | 13                                | 151                  | 39                           | 0.52                                    | 0.05                     | 1.50                     | 0.14                    | 19.1  |
| G031.223−00.139 | 31.223                          | −0.139                       | 31.225                   | −0.136                | 16                                | 13                                | 195                  | 29                           | 0.10                                    | 0.02                     | 0.46                     | 0.10                    | 5.2   |
| G031.229+00.136 | 31.229                          | 0.136                        | 31.227                   | 0.137                 | 12                                | 10                                | 204                  | 24                           | 0.16                                    | 0.03                     | 0.50                     | 0.10                    | 5.2   |
| G031.229−00.027 | 31.229                          | −0.027                       | 31.228                   | −0.026                | 12                                | 10                                | 139                  | 25                           | 0.27                                    | 0.03                     | 0.60                     | 0.07                    | 11.9  |
| G031.229−00.043 | 31.229                          | −0.043                       | 31.228                   | −0.041                | 19                                | 13                                | 230                  | 35                           | 0.21                                    | 0.03                     | 1.03                     | 0.13                    | 9.9   |
| G031.233−00.072 | 31.233                          | −0.072                       | 31.236                   | −0.072                | 18                                | 11                                | 167                  | 36                           | 0.45                                    | 0.04                     | 1.66                     | 0.17                    | 16.8  |
| G031.233−00.162 | 31.233                          | −0.162                       | 31.231                   | −0.161                | 17                                | 12                                | 162                  | 35                           | 0.38                                    | 0.04                     | 1.06                     | 0.11                    | 13.7  |
| G031.238−00.011 | 31.238                          | −0.011                       | 31.236                   | −0.011                | 9                                 | 6                                 | 125                  | 21                           | 0.60                                    | 0.05                     | 0.94                     | 0.08                    | 23.7  |
| G031.239+00.063 | 31.239                          | 0.063                        | 31.237                   | 0.063                 | 20                                | 12                                | 180                  | 37                           | 0.44                                    | 0.05                     | 2.32                     | 0.24                    | 15.6  |
| G031.241−00.059 | 31.241                          | −0.059                       | 31.243                   | −0.056                | 21                                | 13                                | 134                  | 38                           | 0.35                                    | 0.04                     | 1.59                     | 0.17                    | 14.0  |
| G031.241−00.127 | 31.241                          | −0.127                       | 31.240                   | −0.129                | 17                                | 8                                 | 269                  | 28                           | 0.29                                    | 0.04                     | 0.75                     | 0.09                    | 11.0  |
| G031.243−00.111 | 31.243                          | −0.111                       | 31.243                   | −0.110                | 18                                | 9                                 | 121                  | 42                           | 3.17                                    | 0.25                     | 5.47                     | 0.44                    | 117.9 |
| G031.245−00.308 | 31.245                          | −0.308                       | 31.246                   | −0.308                | 8                                 | 6                                 | 135                  | 18                           | 0.16                                    | 0.03                     | 0.35                     | 0.07                    | 5.8   |
| G031.249−00.151 | 31.249                          | −0.151                       | 31.248                   | −0.151                | 13                                | 9                                 | 244                  | 27                           | 0.17                                    | 0.03                     | 0.57                     | 0.09                    | 7.4   |
| G031.252+00.002 | 31.252                          | 0.002                        | 31.250                   | 0.006                 | 18                                | 12                                | 213                  | 36                           | 0.45                                    | 0.04                     | 1.20                     | 0.12                    | 17.9  |
| G031.254+00.058 | 31.254                          | 0.058                        | 31.249                   | 0.055                 | 34                                | 15                                | 157                  | 52                           | 0.85                                    | 0.07                     | 4.71                     | 0.41                    | 31.1  |
| G031.261−00.314 | 31.261                          | −0.314                       | 31.261                   | −0.315                | 22                                | 8                                 | 230                  | 31                           | 0.22                                    | 0.03                     | 0.92                     | 0.14                    | 8.0   |
| G031.262−00.023 | 31.262                          | −0.023                       | 31.260                   | −0.023                | 17                                | 10                                | 206                  | 31                           | 0.28                                    | 0.03                     | 0.77                     | 0.09                    | 11.3  |
| G031.262−00.407 | 31.262                          | −0.407                       | 31.261                   | −0.407                | 11                                | 9                                 | 103                  | 27                           | 0.43                                    | 0.05                     | 0.88                     | 0.10                    | 13.2  |
| G031.269+00.077 | 31.269                          | 0.077                        | 31.269                   | 0.079                 | 18                                | 14                                | 192                  | 34                           | 0.30                                    | 0.04                     | 1.57                     | 0.19                    | 11.1  |

Table 2: Cont.

| Name            | $\ell_{\max}$<br>( $^{\circ}$ ) | $b_{\max}$<br>( $^{\circ}$ ) | $\ell$<br>( $^{\circ}$ ) | $b$<br>( $^{\circ}$ ) | $\sigma_{\text{maj}}$<br>( $''$ ) | $\sigma_{\text{min}}$<br>( $''$ ) | PA<br>( $^{\circ}$ ) | $R_{\text{eff}}$<br>( $''$ ) | $S_{\text{peak}}$<br>(Jy beam $^{-1}$ ) | $\Delta S_{\text{peak}}$ | $S_{\text{int}}$<br>(Jy) | $\Delta S_{\text{int}}$ | SNR   |
|-----------------|---------------------------------|------------------------------|--------------------------|-----------------------|-----------------------------------|-----------------------------------|----------------------|------------------------------|-----------------------------------------|--------------------------|--------------------------|-------------------------|-------|
| (1)             | (2)                             | (3)                          | (4)                      | (5)                   | (6)                               | (7)                               | (8)                  | (9)                          | (10)                                    | (11)                     | (12)                     | (13)                    | (14)  |
| G031.273+00.133 | 31.273                          | 0.133                        | 31.279                   | 0.139                 | 29                                | 19                                | 148                  | 43                           | 0.27                                    | 0.04                     | 1.45                     | 0.19                    | 9.5   |
| G031.275+00.006 | 31.275                          | 0.006                        | 31.275                   | 0.006                 | 12                                | 8                                 | 246                  | 27                           | 0.31                                    | 0.04                     | 0.64                     | 0.07                    | 12.1  |
| G031.275+00.090 | 31.275                          | 0.090                        | 31.276                   | 0.091                 | 11                                | 8                                 | 164                  | 23                           | 0.27                                    | 0.04                     | 0.67                     | 0.09                    | 9.1   |
| G031.276−00.069 | 31.276                          | −0.069                       | 31.276                   | −0.067                | 14                                | 7                                 | 202                  | 24                           | 0.17                                    | 0.03                     | 0.44                     | 0.07                    | 7.3   |
| G031.281+00.061 | 31.281                          | 0.061                        | 31.277                   | 0.062                 | 25                                | 17                                | 184                  | 65                           | 5.96                                    | 0.48                     | 17.18                    | 1.38                    | 215.3 |
| G031.282+00.023 | 31.282                          | 0.023                        | 31.281                   | 0.023                 | 19                                | 12                                | 161                  | 34                           | 0.17                                    | 0.03                     | 0.82                     | 0.14                    | 6.5   |
| G031.285+00.127 | 31.285                          | 0.127                        | 31.285                   | 0.128                 | 13                                | 11                                | 232                  | 28                           | 0.16                                    | 0.03                     | 0.63                     | 0.12                    | 5.9   |
| G031.286+00.083 | 31.286                          | 0.083                        | 31.287                   | 0.084                 | 16                                | 11                                | 175                  | 31                           | 0.35                                    | 0.04                     | 1.07                     | 0.12                    | 12.4  |
| G031.290−00.091 | 31.290                          | −0.091                       | 31.291                   | −0.088                | 14                                | 10                                | 155                  | 27                           | 0.12                                    | 0.02                     | 0.43                     | 0.09                    | 5.3   |
| G031.304−00.134 | 31.304                          | −0.134                       | 31.305                   | −0.135                | 14                                | 10                                | 200                  | 31                           | 0.41                                    | 0.04                     | 1.04                     | 0.11                    | 15.2  |
| G031.311−00.114 | 31.311                          | −0.114                       | 31.309                   | −0.114                | 10                                | 6                                 | 121                  | 18                           | 0.17                                    | 0.03                     | 0.31                     | 0.05                    | 6.9   |
| G031.313+00.161 | 31.313                          | 0.161                        | 31.313                   | 0.162                 | 8                                 | 6                                 | 222                  | 19                           | 0.26                                    | 0.04                     | 0.45                     | 0.06                    | 8.5   |
| G031.327+00.062 | 31.327                          | 0.062                        | 31.328                   | 0.071                 | 37                                | 27                                | 249                  | 53                           | 0.20                                    | 0.03                     | 1.56                     | 0.22                    | 8.8   |
| G031.327−00.130 | 31.327                          | −0.130                       | 31.326                   | −0.133                | 15                                | 12                                | 114                  | 29                           | 0.11                                    | 0.02                     | 0.52                     | 0.10                    | 5.8   |
| G031.331−00.157 | 31.331                          | −0.157                       | 31.332                   | −0.156                | 13                                | 6                                 | 148                  | 20                           | 0.17                                    | 0.03                     | 0.38                     | 0.06                    | 6.8   |
| G031.345−00.147 | 31.345                          | −0.147                       | 31.344                   | −0.149                | 14                                | 9                                 | 238                  | 26                           | 0.22                                    | 0.03                     | 0.71                     | 0.11                    | 8.0   |
| G031.349−00.251 | 31.349                          | −0.251                       | 31.349                   | −0.255                | 27                                | 10                                | 249                  | 34                           | 0.24                                    | 0.04                     | 0.87                     | 0.13                    | 7.8   |
| G031.363−00.062 | 31.363                          | −0.062                       | 31.364                   | −0.062                | 15                                | 13                                | 132                  | 32                           | 0.11                                    | 0.02                     | 0.55                     | 0.11                    | 5.3   |
| G031.364+00.172 | 31.364                          | 0.172                        | 31.364                   | 0.173                 | 9                                 | 8                                 | 119                  | 21                           | 0.16                                    | 0.03                     | 0.39                     | 0.07                    | 5.8   |
| G031.383+00.311 | 31.383                          | 0.311                        | 31.383                   | 0.313                 | 16                                | 9                                 | 115                  | 30                           | 0.42                                    | 0.05                     | 1.81                     | 0.21                    | 11.8  |
| G031.386−00.268 | 31.386                          | −0.268                       | 31.385                   | −0.268                | 11                                | 9                                 | 91                   | 24                           | 0.59                                    | 0.06                     | 1.31                     | 0.12                    | 19.3  |
| G031.388−00.278 | 31.388                          | −0.278                       | 31.389                   | −0.278                | 15                                | 9                                 | 155                  | 26                           | 0.23                                    | 0.03                     | 0.93                     | 0.14                    | 8.1   |
| G031.392+00.204 | 31.392                          | 0.204                        | 31.392                   | 0.205                 | 11                                | 9                                 | 93                   | 26                           | 0.37                                    | 0.05                     | 0.90                     | 0.12                    | 9.2   |
| G031.393−00.026 | 31.393                          | −0.026                       | 31.391                   | −0.025                | 12                                | 10                                | 144                  | 26                           | 0.22                                    | 0.03                     | 0.52                     | 0.07                    | 8.6   |
| G031.395+00.306 | 31.395                          | 0.306                        | 31.392                   | 0.299                 | 35                                | 15                                | 96                   | 47                           | 0.80                                    | 0.07                     | 5.25                     | 0.49                    | 21.0  |
| G031.395−00.256 | 31.395                          | −0.256                       | 31.396                   | −0.258                | 20                                | 14                                | 242                  | 52                           | 5.53                                    | 0.44                     | 9.46                     | 0.76                    | 170.7 |
| G031.409−00.198 | 31.409                          | −0.198                       | 31.405                   | −0.200                | 20                                | 9                                 | 133                  | 32                           | 0.18                                    | 0.03                     | 0.84                     | 0.15                    | 6.3   |
| G031.413+00.047 | 31.413                          | 0.047                        | 31.412                   | 0.048                 | 10                                | 8                                 | 244                  | 24                           | 0.26                                    | 0.03                     | 0.52                     | 0.07                    | 9.8   |
| G031.413+00.306 | 31.413                          | 0.306                        | 31.412                   | 0.307                 | 22                                | 16                                | 126                  | 68                           | 22.64                                   | 1.81                     | 35.96                    | 2.88                    | 476.5 |
| G031.419−00.156 | 31.419                          | −0.156                       | 31.421                   | −0.154                | 20                                | 6                                 | 152                  | 18                           | 0.15                                    | 0.03                     | 0.27                     | 0.06                    | 5.1   |
| G031.426+00.165 | 31.426                          | 0.165                        | 31.428                   | 0.166                 | 15                                | 6                                 | 188                  | 23                           | 0.14                                    | 0.03                     | 0.42                     | 0.09                    | 5.0   |
| G031.427−00.140 | 31.427                          | −0.140                       | 31.427                   | −0.136                | 32                                | 16                                | 206                  | 41                           | 0.28                                    | 0.04                     | 1.10                     | 0.15                    | 9.4   |
| G031.427−00.195 | 31.427                          | −0.195                       | 31.424                   | −0.191                | 16                                | 11                                | 232                  | 30                           | 0.18                                    | 0.03                     | 0.64                     | 0.12                    | 6.1   |
| G031.434−00.105 | 31.434                          | −0.105                       | 31.435                   | −0.103                | 15                                | 9                                 | 170                  | 27                           | 0.27                                    | 0.04                     | 0.61                     | 0.08                    | 9.0   |
| G031.464+00.184 | 31.464                          | 0.184                        | 31.465                   | 0.184                 | 19                                | 15                                | 226                  | 41                           | 0.32                                    | 0.04                     | 1.38                     | 0.16                    | 11.8  |
| G031.478−00.344 | 31.478                          | −0.344                       | 31.475                   | −0.342                | 18                                | 14                                | 195                  | 34                           | 0.24                                    | 0.03                     | 1.22                     | 0.17                    | 8.5   |
| G031.496+00.177 | 31.496                          | 0.177                        | 31.496                   | 0.177                 | 15                                | 10                                | 184                  | 35                           | 0.54                                    | 0.05                     | 1.23                     | 0.11                    | 21.0  |
| G031.499−00.130 | 31.499                          | −0.130                       | 31.498                   | −0.130                | 6                                 | 6                                 | 141                  | 15                           | 0.18                                    | 0.04                     | 0.29                     | 0.06                    | 5.2   |
| G031.509−00.164 | 31.509                          | −0.164                       | 31.511                   | −0.163                | 15                                | 9                                 | 168                  | 25                           | 0.20                                    | 0.03                     | 0.48                     | 0.08                    | 6.8   |
| G031.520−00.181 | 31.520                          | −0.181                       | 31.517                   | −0.181                | 19                                | 11                                | 179                  | 29                           | 0.18                                    | 0.03                     | 0.57                     | 0.10                    | 6.4   |
| G031.541−00.096 | 31.541                          | −0.096                       | 31.549                   | −0.088                | 29                                | 10                                | 140                  | 35                           | 0.18                                    | 0.03                     | 1.07                     | 0.18                    | 6.6   |
| G031.542−00.040 | 31.542                          | −0.040                       | 31.541                   | −0.037                | 26                                | 10                                | 263                  | 37                           | 0.29                                    | 0.04                     | 1.20                     | 0.17                    | 8.6   |
| G031.549−00.679 | 31.549                          | −0.679                       | 31.546                   | −0.679                | 11                                | 9                                 | 200                  | 24                           | 0.21                                    | 0.04                     | 0.54                     | 0.09                    | 6.5   |
| G031.552−00.360 | 31.552                          | −0.360                       | 31.554                   | −0.360                | 10                                | 6                                 | 165                  | 21                           | 0.18                                    | 0.03                     | 0.37                     | 0.07                    | 5.8   |
| G031.555−00.100 | 31.555                          | −0.100                       | 31.555                   | −0.100                | 12                                | 11                                | 170                  | 26                           | 0.21                                    | 0.03                     | 0.69                     | 0.10                    | 8.0   |
| G031.563−00.107 | 31.563                          | −0.107                       | 31.562                   | −0.106                | 8                                 | 6                                 | 99                   | 17                           | 0.20                                    | 0.03                     | 0.34                     | 0.05                    | 7.2   |
| G031.566−00.271 | 31.566                          | −0.271                       | 31.565                   | −0.271                | 15                                | 13                                | 236                  | 33                           | 0.27                                    | 0.04                     | 0.93                     | 0.12                    | 9.4   |
| G031.568+00.091 | 31.568                          | 0.091                        | 31.568                   | 0.092                 | 14                                | 8                                 | 151                  | 30                           | 0.41                                    | 0.04                     | 0.95                     | 0.09                    | 17.9  |
| G031.569−00.071 | 31.569                          | −0.071                       | 31.566                   | −0.071                | 16                                | 8                                 | 158                  | 27                           | 0.22                                    | 0.03                     | 0.63                     | 0.10                    | 7.5   |
| G031.575−00.095 | 31.575                          | −0.095                       | 31.573                   | −0.095                | 16                                | 7                                 | 255                  | 24                           | 0.17                                    | 0.03                     | 0.48                     | 0.08                    | 6.7   |
| G031.580+00.224 | 31.580                          | 0.224                        | 31.579                   | 0.229                 | 18                                | 12                                | 253                  | 30                           | 0.17                                    | 0.03                     | 0.62                     | 0.12                    | 5.9   |
| G031.581+00.078 | 31.581                          | 0.078                        | 31.580                   | 0.077                 | 18                                | 14                                | 169                  | 53                           | 4.64                                    | 0.37                     | 8.21                     | 0.66                    | 186.7 |
| G031.581+00.204 | 31.581                          | 0.204                        | 31.582                   | 0.204                 | 18                                | 10                                | 164                  | 31                           | 0.23                                    | 0.03                     | 0.77                     | 0.11                    | 8.5   |
| G031.582−00.119 | 31.582                          | −0.119                       | 31.583                   | −0.118                | 9                                 | 7                                 | 164                  | 22                           | 0.77                                    | 0.07                     | 1.13                     | 0.10                    | 23.6  |
| G031.586+00.137 | 31.586                          | 0.137                        | 31.584                   | 0.137                 | 10                                | 6                                 | 156                  | 17                           | 0.10                                    | 0.02                     | 0.24                     | 0.05                    | 5.1   |
| G031.587−00.203 | 31.587                          | −0.203                       | 31.584                   | −0.202                | 26                                | 10                                | 233                  | 34                           | 0.19                                    | 0.03                     | 0.96                     | 0.16                    | 6.8   |



Table 2: Cont.

| Name            | $\ell_{\max}$<br>( $^{\circ}$ ) | $b_{\max}$<br>( $^{\circ}$ ) | $\ell$<br>( $^{\circ}$ ) | $b$<br>( $^{\circ}$ ) | $\sigma_{\text{maj}}$<br>( $''$ ) | $\sigma_{\text{min}}$<br>( $''$ ) | PA<br>( $^{\circ}$ ) | $R_{\text{eff}}$<br>( $''$ ) | $S_{\text{peak}}$<br>(Jy beam $^{-1}$ ) | $\Delta S_{\text{peak}}$ | $S_{\text{int}}$<br>(Jy) | $\Delta S_{\text{int}}$ | SNR  |
|-----------------|---------------------------------|------------------------------|--------------------------|-----------------------|-----------------------------------|-----------------------------------|----------------------|------------------------------|-----------------------------------------|--------------------------|--------------------------|-------------------------|------|
| (1)             | (2)                             | (3)                          | (4)                      | (5)                   | (6)                               | (7)                               | (8)                  | (9)                          | (10)                                    | (11)                     | (12)                     | (13)                    | (14) |
| G031.591+00.334 | 31.591                          | 0.334                        | 31.588                   | 0.334                 | 13                                | 6                                 | 176                  | 21                           | 0.15                                    | 0.03                     | 0.41                     | 0.08                    | 5.6  |
| G031.591−00.326 | 31.591                          | −0.326                       | 31.590                   | −0.326                | 14                                | 6                                 | 187                  | 23                           | 0.20                                    | 0.03                     | 0.48                     | 0.08                    | 6.6  |
| G031.595−00.192 | 31.595                          | −0.192                       | 31.591                   | −0.192                | 15                                | 10                                | 177                  | 32                           | 0.65                                    | 0.06                     | 1.47                     | 0.14                    | 20.8 |
| G031.596−00.342 | 31.596                          | −0.342                       | 31.591                   | −0.342                | 31                                | 16                                | 174                  | 39                           | 0.28                                    | 0.04                     | 1.12                     | 0.15                    | 9.4  |
| G031.598+00.081 | 31.598                          | 0.081                        | 31.598                   | 0.083                 | 7                                 | 5                                 | 150                  | 15                           | 0.12                                    | 0.02                     | 0.24                     | 0.05                    | 5.1  |
| G031.601+00.098 | 31.601                          | 0.098                        | 31.602                   | 0.101                 | 25                                | 13                                | 260                  | 29                           | 0.13                                    | 0.03                     | 0.48                     | 0.10                    | 5.5  |
| G031.602+00.168 | 31.602                          | 0.168                        | 31.604                   | 0.170                 | 19                                | 11                                | 140                  | 31                           | 0.13                                    | 0.02                     | 0.50                     | 0.09                    | 5.9  |
| G031.605+00.134 | 31.605                          | 0.134                        | 31.603                   | 0.135                 | 16                                | 13                                | 123                  | 33                           | 0.15                                    | 0.02                     | 0.77                     | 0.12                    | 7.3  |
| G031.613+00.152 | 31.613                          | 0.152                        | 31.612                   | 0.152                 | 7                                 | 5                                 | 150                  | 16                           | 0.13                                    | 0.02                     | 0.24                     | 0.04                    | 6.4  |
| G031.623+00.332 | 31.623                          | 0.332                        | 31.623                   | 0.333                 | 10                                | 6                                 | 233                  | 19                           | 0.16                                    | 0.03                     | 0.31                     | 0.06                    | 5.4  |
| G031.624+00.144 | 31.624                          | 0.144                        | 31.619                   | 0.144                 | 21                                | 8                                 | 171                  | 32                           | 0.27                                    | 0.03                     | 0.96                     | 0.12                    | 11.1 |
| G031.633+00.336 | 31.633                          | 0.336                        | 31.632                   | 0.337                 | 7                                 | 6                                 | 154                  | 16                           | 0.15                                    | 0.03                     | 0.27                     | 0.06                    | 5.2  |
| G031.640−00.369 | 31.640                          | −0.369                       | 31.636                   | −0.367                | 18                                | 8                                 | 207                  | 29                           | 0.17                                    | 0.03                     | 0.72                     | 0.13                    | 5.9  |
| G031.643−00.267 | 31.643                          | −0.267                       | 31.644                   | −0.267                | 12                                | 9                                 | 224                  | 27                           | 0.39                                    | 0.04                     | 0.91                     | 0.10                    | 12.7 |
| G031.648−00.255 | 31.648                          | −0.255                       | 31.648                   | −0.252                | 14                                | 9                                 | 114                  | 26                           | 0.16                                    | 0.03                     | 0.67                     | 0.12                    | 6.0  |
| G031.655+00.132 | 31.655                          | 0.132                        | 31.656                   | 0.133                 | 9                                 | 5                                 | 187                  | 18                           | 0.11                                    | 0.02                     | 0.24                     | 0.05                    | 5.3  |
| G031.661+00.367 | 31.661                          | 0.367                        | 31.661                   | 0.367                 | 7                                 | 6                                 | 146                  | 17                           | 0.24                                    | 0.04                     | 0.37                     | 0.06                    | 7.2  |
| G031.664−00.377 | 31.664                          | −0.377                       | 31.660                   | −0.372                | 34                                | 18                                | 169                  | 50                           | 0.28                                    | 0.04                     | 1.93                     | 0.26                    | 9.1  |
| G031.666+00.240 | 31.666                          | 0.240                        | 31.666                   | 0.242                 | 21                                | 10                                | 212                  | 35                           | 0.47                                    | 0.05                     | 1.75                     | 0.19                    | 13.5 |
| G031.667−00.243 | 31.667                          | −0.243                       | 31.664                   | −0.241                | 26                                | 10                                | 254                  | 32                           | 0.15                                    | 0.03                     | 0.68                     | 0.13                    | 5.5  |
| G031.668−00.613 | 31.668                          | −0.613                       | 31.668                   | −0.615                | 12                                | 10                                | 259                  | 26                           | 0.16                                    | 0.03                     | 0.56                     | 0.11                    | 5.8  |
| G031.671−00.052 | 31.671                          | −0.052                       | 31.672                   | −0.051                | 21                                | 13                                | 209                  | 41                           | 0.32                                    | 0.04                     | 1.66                     | 0.19                    | 12.0 |
| G031.676+00.243 | 31.676                          | 0.243                        | 31.676                   | 0.244                 | 8                                 | 8                                 | 122                  | 21                           | 0.48                                    | 0.06                     | 0.94                     | 0.11                    | 11.6 |
| G031.684−00.106 | 31.684                          | −0.106                       | 31.685                   | −0.105                | 11                                | 8                                 | 131                  | 23                           | 0.17                                    | 0.03                     | 0.52                     | 0.10                    | 6.1  |
| G031.684−00.181 | 31.684                          | −0.181                       | 31.676                   | −0.176                | 36                                | 10                                | 226                  | 42                           | 0.37                                    | 0.04                     | 1.88                     | 0.22                    | 11.6 |
| G031.686−00.063 | 31.686                          | −0.063                       | 31.685                   | −0.064                | 10                                | 9                                 | 93                   | 22                           | 0.21                                    | 0.03                     | 0.47                     | 0.07                    | 8.0  |
| G031.694−00.185 | 31.694                          | −0.185                       | 31.694                   | −0.186                | 16                                | 9                                 | 207                  | 30                           | 0.33                                    | 0.04                     | 1.37                     | 0.17                    | 10.9 |
| G031.696−00.113 | 31.696                          | −0.113                       | 31.695                   | −0.112                | 19                                | 10                                | 93                   | 31                           | 0.31                                    | 0.04                     | 0.92                     | 0.12                    | 9.5  |
| G031.700−00.496 | 31.700                          | −0.496                       | 31.699                   | −0.494                | 17                                | 10                                | 190                  | 32                           | 0.32                                    | 0.04                     | 1.16                     | 0.14                    | 10.9 |
| G031.711−00.191 | 31.711                          | −0.191                       | 31.714                   | −0.184                | 38                                | 23                                | 102                  | 44                           | 0.15                                    | 0.03                     | 1.12                     | 0.20                    | 6.4  |
| G031.725−00.124 | 31.725                          | −0.124                       | 31.724                   | −0.123                | 8                                 | 5                                 | 180                  | 17                           | 0.26                                    | 0.04                     | 0.45                     | 0.07                    | 8.0  |
| G031.735−00.182 | 31.735                          | −0.182                       | 31.735                   | −0.181                | 12                                | 10                                | 106                  | 27                           | 0.34                                    | 0.04                     | 0.78                     | 0.09                    | 12.0 |
| G031.740−00.194 | 31.740                          | −0.194                       | 31.738                   | −0.195                | 14                                | 8                                 | 95                   | 25                           | 0.14                                    | 0.03                     | 0.59                     | 0.11                    | 5.9  |
| G031.748−00.008 | 31.748                          | −0.008                       | 31.748                   | −0.006                | 18                                | 10                                | 133                  | 33                           | 0.28                                    | 0.03                     | 0.83                     | 0.10                    | 11.8 |
| G031.763−00.237 | 31.763                          | −0.237                       | 31.765                   | −0.241                | 25                                | 14                                | 205                  | 36                           | 0.17                                    | 0.03                     | 1.02                     | 0.18                    | 6.3  |
| G031.785−00.264 | 31.785                          | −0.264                       | 31.784                   | −0.264                | 19                                | 10                                | 211                  | 31                           | 0.23                                    | 0.03                     | 0.83                     | 0.12                    | 8.1  |
| G031.798−00.085 | 31.798                          | −0.085                       | 31.797                   | −0.085                | 11                                | 8                                 | 255                  | 21                           | 0.12                                    | 0.02                     | 0.38                     | 0.07                    | 5.8  |
| G031.807−00.094 | 31.807                          | −0.094                       | 31.808                   | −0.093                | 21                                | 11                                | 240                  | 34                           | 0.15                                    | 0.03                     | 0.80                     | 0.13                    | 6.7  |
| G031.813+00.100 | 31.813                          | 0.100                        | 31.812                   | 0.100                 | 9                                 | 7                                 | 187                  | 19                           | 0.10                                    | 0.02                     | 0.25                     | 0.05                    | 5.1  |
| G031.824−00.113 | 31.824                          | −0.113                       | 31.824                   | −0.112                | 11                                | 7                                 | 219                  | 24                           | 0.58                                    | 0.05                     | 1.03                     | 0.10                    | 21.1 |
| G031.828−00.105 | 31.828                          | −0.105                       | 31.827                   | −0.103                | 15                                | 11                                | 111                  | 30                           | 0.29                                    | 0.04                     | 0.93                     | 0.11                    | 10.8 |
| G031.840−00.129 | 31.840                          | −0.129                       | 31.837                   | −0.128                | 20                                | 14                                | 185                  | 32                           | 0.20                                    | 0.03                     | 0.79                     | 0.12                    | 7.9  |
| G031.844−00.117 | 31.844                          | −0.117                       | 31.843                   | −0.116                | 8                                 | 5                                 | 118                  | 16                           | 0.16                                    | 0.03                     | 0.27                     | 0.05                    | 6.8  |
| G031.846+00.022 | 31.846                          | 0.022                        | 31.844                   | 0.023                 | 20                                | 13                                | 99                   | 40                           | 0.39                                    | 0.04                     | 1.48                     | 0.14                    | 17.6 |
| G031.848−00.325 | 31.848                          | −0.325                       | 31.847                   | −0.323                | 10                                | 10                                | 145                  | 25                           | 0.16                                    | 0.03                     | 0.50                     | 0.10                    | 5.8  |
| G031.870−00.090 | 31.870                          | −0.090                       | 31.872                   | −0.090                | 16                                | 12                                | 122                  | 33                           | 0.27                                    | 0.03                     | 0.85                     | 0.11                    | 10.5 |
| G031.900+00.342 | 31.900                          | 0.342                        | 31.900                   | 0.342                 | 13                                | 10                                | 249                  | 30                           | 0.35                                    | 0.05                     | 1.07                     | 0.14                    | 9.4  |
| G031.910−00.243 | 31.910                          | −0.243                       | 31.909                   | −0.242                | 13                                | 9                                 | 235                  | 23                           | 0.14                                    | 0.03                     | 0.44                     | 0.09                    | 5.3  |
| G031.912+00.188 | 31.912                          | 0.188                        | 31.913                   | 0.192                 | 22                                | 7                                 | 103                  | 29                           | 0.21                                    | 0.04                     | 0.75                     | 0.15                    | 5.6  |
| G031.916+00.439 | 31.916                          | 0.439                        | 31.916                   | 0.440                 | 13                                | 12                                | 95                   | 30                           | 0.34                                    | 0.05                     | 1.13                     | 0.17                    | 8.0  |
| G031.916−00.253 | 31.916                          | −0.253                       | 31.916                   | −0.251                | 18                                | 8                                 | 168                  | 26                           | 0.14                                    | 0.03                     | 0.50                     | 0.10                    | 5.3  |
| G031.928+00.056 | 31.928                          | 0.056                        | 31.930                   | 0.059                 | 17                                | 9                                 | 139                  | 28                           | 0.14                                    | 0.03                     | 0.55                     | 0.11                    | 5.6  |
| G031.933+00.091 | 31.933                          | 0.091                        | 31.934                   | 0.091                 | 11                                | 7                                 | 247                  | 22                           | 0.25                                    | 0.04                     | 0.64                     | 0.09                    | 8.7  |
| G031.945+00.076 | 31.945                          | 0.076                        | 31.945                   | 0.077                 | 20                                | 12                                | 218                  | 38                           | 0.53                                    | 0.05                     | 1.82                     | 0.18                    | 18.2 |
| G031.970+00.059 | 31.970                          | 0.059                        | 31.964                   | 0.064                 | 26                                | 12                                | 217                  | 39                           | 0.31                                    | 0.04                     | 1.90                     | 0.24                    | 10.4 |
| G031.984+00.063 | 31.984                          | 0.063                        | 31.982                   | 0.065                 | 13                                | 10                                | 184                  | 28                           | 0.49                                    | 0.06                     | 1.45                     | 0.17                    | 12.3 |

Table 2: Cont.

| Name            | $\ell_{\max}$<br>( $^{\circ}$ ) | $b_{\max}$<br>( $^{\circ}$ ) | $\ell$<br>( $^{\circ}$ ) | $b$<br>( $^{\circ}$ ) | $\sigma_{\text{maj}}$<br>( $''$ ) | $\sigma_{\text{min}}$<br>( $''$ ) | PA<br>( $^{\circ}$ ) | $R_{\text{eff}}$<br>( $''$ ) | $S_{\text{peak}}$<br>(Jy beam $^{-1}$ ) | $\Delta S_{\text{peak}}$ | $S_{\text{int}}$<br>(Jy) | $\Delta S_{\text{int}}$ | SNR   |
|-----------------|---------------------------------|------------------------------|--------------------------|-----------------------|-----------------------------------|-----------------------------------|----------------------|------------------------------|-----------------------------------------|--------------------------|--------------------------|-------------------------|-------|
| (1)             | (2)                             | (3)                          | (4)                      | (5)                   | (6)                               | (7)                               | (8)                  | (9)                          | (10)                                    | (11)                     | (12)                     | (13)                    | (14)  |
| G031.987−00.306 | 31.987                          | −0.306                       | 31.984                   | −0.301                | 21                                | 14                                | 233                  | 38                           | 0.24                                    | 0.03                     | 1.05                     | 0.14                    | 9.3   |
| G031.997+00.067 | 31.997                          | 0.067                        | 31.995                   | 0.068                 | 15                                | 10                                | 171                  | 29                           | 0.53                                    | 0.06                     | 1.81                     | 0.20                    | 13.7  |
| G031.999−00.199 | 31.999                          | −0.199                       | 31.998                   | −0.199                | 17                                | 10                                | 170                  | 36                           | 0.42                                    | 0.04                     | 1.36                     | 0.13                    | 17.4  |
| G032.003−00.510 | 32.003                          | −0.510                       | 32.003                   | −0.509                | 23                                | 9                                 | 172                  | 28                           | 0.14                                    | 0.03                     | 0.45                     | 0.08                    | 6.3   |
| G032.012+00.057 | 32.012                          | 0.057                        | 32.008                   | 0.057                 | 17                                | 13                                | 212                  | 36                           | 1.17                                    | 0.10                     | 4.90                     | 0.43                    | 29.1  |
| G032.018+00.063 | 32.018                          | 0.063                        | 32.019                   | 0.066                 | 21                                | 16                                | 136                  | 43                           | 1.58                                    | 0.13                     | 6.97                     | 0.59                    | 38.7  |
| G032.026+00.058 | 32.026                          | 0.058                        | 32.025                   | 0.056                 | 19                                | 8                                 | 111                  | 30                           | 1.18                                    | 0.10                     | 4.74                     | 0.41                    | 28.2  |
| G032.036+00.056 | 32.036                          | 0.056                        | 32.034                   | 0.055                 | 19                                | 11                                | 97                   | 36                           | 2.37                                    | 0.19                     | 7.38                     | 0.60                    | 56.7  |
| G032.044+00.059 | 32.044                          | 0.059                        | 32.045                   | 0.060                 | 18                                | 14                                | 127                  | 47                           | 5.81                                    | 0.47                     | 11.81                    | 0.95                    | 132.7 |
| G032.052−00.091 | 32.052                          | −0.091                       | 32.052                   | −0.089                | 10                                | 8                                 | 142                  | 25                           | 0.36                                    | 0.04                     | 0.63                     | 0.07                    | 14.2  |
| G032.066−00.089 | 32.066                          | −0.089                       | 32.066                   | −0.088                | 16                                | 11                                | 181                  | 32                           | 0.34                                    | 0.04                     | 0.83                     | 0.09                    | 13.2  |
| G032.090−00.066 | 32.090                          | −0.066                       | 32.090                   | −0.067                | 7                                 | 5                                 | 208                  | 15                           | 0.20                                    | 0.03                     | 0.34                     | 0.05                    | 7.2   |
| G032.092−00.503 | 32.092                          | −0.503                       | 32.093                   | −0.503                | 13                                | 8                                 | 199                  | 24                           | 0.14                                    | 0.03                     | 0.42                     | 0.08                    | 5.6   |
| G032.094−00.073 | 32.094                          | −0.073                       | 32.088                   | −0.072                | 18                                | 6                                 | 192                  | 23                           | 0.16                                    | 0.03                     | 0.53                     | 0.10                    | 6.0   |
| G032.105−00.074 | 32.105                          | −0.074                       | 32.104                   | −0.074                | 10                                | 7                                 | 179                  | 22                           | 0.50                                    | 0.05                     | 0.83                     | 0.09                    | 15.3  |
| G032.117+00.090 | 32.117                          | 0.090                        | 32.119                   | 0.092                 | 20                                | 16                                | 152                  | 51                           | 2.05                                    | 0.17                     | 6.30                     | 0.52                    | 50.8  |
| G032.118−00.050 | 32.118                          | −0.050                       | 32.118                   | −0.050                | 16                                | 7                                 | 208                  | 26                           | 0.16                                    | 0.03                     | 0.64                     | 0.12                    | 5.7   |
| G032.118−00.069 | 32.118                          | −0.069                       | 32.115                   | −0.068                | 11                                | 10                                | 167                  | 24                           | 0.15                                    | 0.03                     | 0.57                     | 0.11                    | 5.5   |
| G032.123−00.158 | 32.123                          | −0.158                       | 32.121                   | −0.157                | 23                                | 13                                | 137                  | 37                           | 0.35                                    | 0.04                     | 1.02                     | 0.12                    | 12.3  |
| G032.126−00.295 | 32.126                          | −0.295                       | 32.125                   | −0.295                | 12                                | 6                                 | 185                  | 19                           | 0.12                                    | 0.03                     | 0.26                     | 0.06                    | 5.0   |
| G032.129−00.089 | 32.129                          | −0.089                       | 32.129                   | −0.088                | 12                                | 8                                 | 236                  | 22                           | 0.18                                    | 0.03                     | 0.47                     | 0.08                    | 6.8   |
| G032.150+00.133 | 32.150                          | 0.133                        | 32.151                   | 0.135                 | 18                                | 14                                | 265                  | 49                           | 3.72                                    | 0.30                     | 9.74                     | 0.79                    | 92.7  |
| G032.151+00.121 | 32.151                          | 0.121                        | 32.152                   | 0.119                 | 18                                | 12                                | 200                  | 34                           | 0.65                                    | 0.06                     | 2.29                     | 0.23                    | 17.2  |
| G032.160−00.280 | 32.160                          | −0.280                       | 32.158                   | −0.279                | 16                                | 11                                | 162                  | 29                           | 0.14                                    | 0.03                     | 0.63                     | 0.13                    | 5.2   |
| G032.171+00.134 | 32.171                          | 0.134                        | 32.172                   | 0.136                 | 17                                | 5                                 | 162                  | 19                           | 0.21                                    | 0.04                     | 0.44                     | 0.08                    | 6.5   |
| G032.210−00.197 | 32.210                          | −0.197                       | 32.210                   | −0.198                | 13                                | 7                                 | 239                  | 21                           | 0.23                                    | 0.04                     | 0.45                     | 0.08                    | 6.5   |
| G032.223+00.017 | 32.223                          | 0.017                        | 32.222                   | 0.018                 | 8                                 | 7                                 | 128                  | 19                           | 0.18                                    | 0.03                     | 0.37                     | 0.07                    | 6.4   |
| G032.272−00.227 | 32.272                          | −0.227                       | 32.272                   | −0.226                | 14                                | 11                                | 209                  | 37                           | 0.95                                    | 0.09                     | 2.42                     | 0.22                    | 21.8  |
| G032.320−00.386 | 32.320                          | −0.386                       | 32.320                   | −0.386                | 13                                | 7                                 | 266                  | 22                           | 0.23                                    | 0.05                     | 0.63                     | 0.12                    | 5.6   |
| G032.346+00.140 | 32.346                          | 0.140                        | 32.344                   | 0.143                 | 25                                | 10                                | 210                  | 27                           | 0.16                                    | 0.03                     | 0.43                     | 0.08                    | 5.7   |
| G032.355+00.295 | 32.355                          | 0.295                        | 32.353                   | 0.297                 | 16                                | 9                                 | 252                  | 28                           | 0.28                                    | 0.04                     | 0.58                     | 0.09                    | 7.5   |
| G032.360+00.082 | 32.360                          | 0.082                        | 32.359                   | 0.084                 | 12                                | 8                                 | 262                  | 23                           | 0.18                                    | 0.03                     | 0.55                     | 0.09                    | 7.1   |
| G032.366+00.066 | 32.366                          | 0.066                        | 32.364                   | 0.067                 | 13                                | 8                                 | 131                  | 24                           | 0.12                                    | 0.02                     | 0.43                     | 0.09                    | 5.5   |
| G032.371+00.081 | 32.371                          | 0.081                        | 32.375                   | 0.080                 | 27                                | 13                                | 194                  | 40                           | 0.27                                    | 0.03                     | 1.44                     | 0.18                    | 10.1  |
| G032.385+00.163 | 32.385                          | 0.163                        | 32.381                   | 0.164                 | 15                                | 6                                 | 187                  | 24                           | 0.24                                    | 0.04                     | 0.70                     | 0.11                    | 7.5   |
| G032.406+00.076 | 32.406                          | 0.076                        | 32.404                   | 0.078                 | 13                                | 9                                 | 146                  | 26                           | 0.29                                    | 0.03                     | 0.75                     | 0.09                    | 11.2  |
| G032.406+00.162 | 32.406                          | 0.162                        | 32.405                   | 0.163                 | 8                                 | 7                                 | 155                  | 19                           | 0.22                                    | 0.04                     | 0.41                     | 0.07                    | 6.8   |
| G032.410−00.099 | 32.410                          | −0.099                       | 32.410                   | −0.098                | 21                                | 9                                 | 215                  | 30                           | 0.17                                    | 0.04                     | 0.79                     | 0.16                    | 5.4   |
| G032.424+00.080 | 32.424                          | 0.080                        | 32.423                   | 0.083                 | 16                                | 15                                | 256                  | 41                           | 0.59                                    | 0.05                     | 2.24                     | 0.21                    | 22.2  |
| G032.436+00.093 | 32.436                          | 0.093                        | 32.437                   | 0.092                 | 17                                | 10                                | 151                  | 28                           | 0.12                                    | 0.02                     | 0.48                     | 0.10                    | 5.4   |
| G032.451+00.143 | 32.451                          | 0.143                        | 32.446                   | 0.142                 | 31                                | 13                                | 142                  | 40                           | 0.20                                    | 0.03                     | 1.19                     | 0.19                    | 7.4   |
| G032.451+00.156 | 32.451                          | 0.156                        | 32.451                   | 0.157                 | 12                                | 9                                 | 244                  | 26                           | 0.32                                    | 0.04                     | 0.89                     | 0.11                    | 11.0  |
| G032.455+00.386 | 32.455                          | 0.386                        | 32.453                   | 0.384                 | 24                                | 12                                | 140                  | 38                           | 0.85                                    | 0.08                     | 1.71                     | 0.16                    | 21.1  |
| G032.459+00.187 | 32.459                          | 0.187                        | 32.459                   | 0.190                 | 18                                | 10                                | 123                  | 32                           | 0.26                                    | 0.03                     | 1.19                     | 0.16                    | 9.3   |
| G032.472+00.203 | 32.472                          | 0.203                        | 32.472                   | 0.205                 | 17                                | 16                                | 223                  | 46                           | 1.20                                    | 0.10                     | 4.65                     | 0.39                    | 38.3  |
| G032.532−00.121 | 32.532                          | −0.121                       | 32.529                   | −0.124                | 19                                | 9                                 | 114                  | 25                           | 0.24                                    | 0.05                     | 0.64                     | 0.13                    | 5.2   |
| G032.582−00.080 | 32.582                          | −0.080                       | 32.582                   | −0.077                | 14                                | 10                                | 105                  | 28                           | 0.31                                    | 0.05                     | 1.10                     | 0.19                    | 6.5   |
| G032.584+00.296 | 32.584                          | 0.296                        | 32.583                   | 0.298                 | 15                                | 9                                 | 262                  | 26                           | 0.19                                    | 0.04                     | 0.59                     | 0.12                    | 5.4   |
| G032.597−00.003 | 32.597                          | −0.003                       | 32.598                   | −0.006                | 17                                | 6                                 | 247                  | 23                           | 0.23                                    | 0.04                     | 0.63                     | 0.12                    | 5.9   |
| G032.606−00.256 | 32.606                          | −0.256                       | 32.604                   | −0.254                | 19                                | 8                                 | 162                  | 29                           | 0.35                                    | 0.06                     | 1.27                     | 0.21                    | 7.0   |
| G032.619−00.240 | 32.619                          | −0.240                       | 32.617                   | −0.240                | 13                                | 7                                 | 154                  | 22                           | 0.29                                    | 0.05                     | 0.82                     | 0.15                    | 6.1   |
| G032.691+00.047 | 32.691                          | 0.047                        | 32.689                   | 0.047                 | 11                                | 8                                 | 137                  | 22                           | 0.21                                    | 0.04                     | 0.51                     | 0.10                    | 5.7   |
| G032.693−00.300 | 32.693                          | −0.300                       | 32.695                   | −0.301                | 19                                | 8                                 | 210                  | 30                           | 0.28                                    | 0.05                     | 1.04                     | 0.19                    | 6.2   |
| G032.701+00.107 | 32.701                          | 0.107                        | 32.698                   | 0.103                 | 17                                | 12                                | 266                  | 33                           | 0.25                                    | 0.04                     | 1.22                     | 0.20                    | 7.0   |
| G032.705−00.062 | 32.705                          | −0.062                       | 32.705                   | −0.059                | 19                                | 11                                | 91                   | 40                           | 0.86                                    | 0.08                     | 3.03                     | 0.29                    | 18.2  |
| G032.718−00.301 | 32.718                          | −0.301                       | 32.717                   | −0.301                | 9                                 | 6                                 | 153                  | 17                           | 0.24                                    | 0.05                     | 0.36                     | 0.07                    | 5.5   |

Table 2: Cont.

| Name            | $\ell_{\max}$<br>( $^{\circ}$ ) | $b_{\max}$<br>( $^{\circ}$ ) | $\ell$<br>( $^{\circ}$ ) | $b$<br>( $^{\circ}$ ) | $\sigma_{\text{maj}}$<br>( $''$ ) | $\sigma_{\text{min}}$<br>( $''$ ) | PA<br>( $^{\circ}$ ) | $R_{\text{eff}}$<br>( $''$ ) | $S_{\text{peak}}$<br>(Jy beam $^{-1}$ ) | $\Delta S_{\text{peak}}$ | $S_{\text{int}}$<br>(Jy) | $\Delta S_{\text{int}}$ | SNR   |
|-----------------|---------------------------------|------------------------------|--------------------------|-----------------------|-----------------------------------|-----------------------------------|----------------------|------------------------------|-----------------------------------------|--------------------------|--------------------------|-------------------------|-------|
| (1)             | (2)                             | (3)                          | (4)                      | (5)                   | (6)                               | (7)                               | (8)                  | (9)                          | (10)                                    | (11)                     | (12)                     | (13)                    | (14)  |
| G032.719−00.041 | 32.719                          | −0.041                       | 32.717                   | −0.034                | 24                                | 11                                | 239                  | 31                           | 0.28                                    | 0.05                     | 1.12                     | 0.19                    | 6.5   |
| G032.729+00.198 | 32.729                          | 0.198                        | 32.729                   | 0.199                 | 6                                 | 5                                 | 230                  | 13                           | 0.27                                    | 0.05                     | 0.48                     | 0.08                    | 6.5   |
| G032.739+00.110 | 32.739                          | 0.110                        | 32.736                   | 0.111                 | 15                                | 11                                | 216                  | 34                           | 0.53                                    | 0.06                     | 1.58                     | 0.17                    | 13.4  |
| G032.739+00.192 | 32.739                          | 0.192                        | 32.738                   | 0.192                 | 13                                | 11                                | 97                   | 30                           | 0.70                                    | 0.08                     | 2.07                     | 0.22                    | 13.7  |
| G032.745−00.075 | 32.745                          | −0.075                       | 32.746                   | −0.074                | 15                                | 12                                | 158                  | 43                           | 5.26                                    | 0.42                     | 9.31                     | 0.75                    | 109.9 |
| G032.750−00.064 | 32.750                          | −0.064                       | 32.750                   | −0.064                | 10                                | 7                                 | 167                  | 23                           | 1.17                                    | 0.10                     | 1.99                     | 0.18                    | 25.0  |
| G032.768−00.183 | 32.768                          | −0.183                       | 32.768                   | −0.183                | 15                                | 10                                | 112                  | 32                           | 0.74                                    | 0.08                     | 1.91                     | 0.20                    | 15.4  |
| G032.774−00.060 | 32.774                          | −0.060                       | 32.774                   | −0.059                | 9                                 | 6                                 | 162                  | 21                           | 0.43                                    | 0.06                     | 0.78                     | 0.10                    | 9.5   |
| G032.795+00.058 | 32.795                          | 0.058                        | 32.794                   | 0.060                 | 8                                 | 6                                 | 255                  | 17                           | 0.20                                    | 0.04                     | 0.40                     | 0.08                    | 5.3   |
| G032.801+00.064 | 32.801                          | 0.064                        | 32.803                   | 0.066                 | 18                                | 14                                | 252                  | 34                           | 0.22                                    | 0.04                     | 1.02                     | 0.19                    | 5.8   |
| G032.805+00.012 | 32.805                          | 0.012                        | 32.804                   | 0.013                 | 7                                 | 7                                 | 180                  | 18                           | 0.31                                    | 0.05                     | 0.52                     | 0.08                    | 7.4   |
| G032.821−00.330 | 32.821                          | −0.330                       | 32.820                   | −0.330                | 12                                | 10                                | 102                  | 37                           | 2.30                                    | 0.19                     | 4.21                     | 0.35                    | 49.7  |
| G032.826−00.219 | 32.826                          | −0.219                       | 32.820                   | −0.219                | 25                                | 12                                | 162                  | 35                           | 0.37                                    | 0.05                     | 2.15                     | 0.32                    | 8.1   |
| G032.827−00.082 | 32.827                          | −0.082                       | 32.828                   | −0.082                | 16                                | 9                                 | 210                  | 32                           | 0.68                                    | 0.07                     | 1.84                     | 0.19                    | 14.6  |
| G032.827−00.209 | 32.827                          | −0.209                       | 32.824                   | −0.209                | 12                                | 9                                 | 163                  | 23                           | 0.38                                    | 0.06                     | 1.33                     | 0.19                    | 8.1   |
| G032.837−00.217 | 32.837                          | −0.217                       | 32.834                   | −0.210                | 24                                | 11                                | 265                  | 37                           | 0.36                                    | 0.05                     | 2.22                     | 0.32                    | 8.3   |
| G032.847+00.071 | 32.847                          | 0.071                        | 32.847                   | 0.073                 | 11                                | 8                                 | 134                  | 25                           | 0.40                                    | 0.06                     | 0.90                     | 0.13                    | 8.6   |
| G032.861−00.413 | 32.861                          | −0.413                       | 32.861                   | −0.411                | 16                                | 12                                | 199                  | 36                           | 0.58                                    | 0.07                     | 2.13                     | 0.24                    | 12.8  |
| G032.878−00.088 | 32.878                          | −0.088                       | 32.878                   | −0.086                | 11                                | 6                                 | 106                  | 20                           | 0.23                                    | 0.05                     | 0.52                     | 0.11                    | 5.0   |
| G032.893−00.190 | 32.893                          | −0.190                       | 32.893                   | −0.190                | 6                                 | 5                                 | 94                   | 14                           | 0.25                                    | 0.05                     | 0.36                     | 0.07                    | 5.7   |
| G032.980−00.074 | 32.980                          | −0.074                       | 32.979                   | −0.073                | 11                                | 10                                | 206                  | 24                           | 0.28                                    | 0.05                     | 0.79                     | 0.14                    | 6.1   |
| G032.991+00.033 | 32.991                          | 0.033                        | 32.991                   | 0.036                 | 18                                | 13                                | 111                  | 44                           | 2.52                                    | 0.21                     | 6.54                     | 0.55                    | 42.6  |
| G033.000−00.023 | 33.000                          | −0.023                       | 32.993                   | −0.016                | 31                                | 10                                | 227                  | 33                           | 0.26                                    | 0.05                     | 1.10                     | 0.21                    | 5.6   |
| G033.017−00.358 | 33.017                          | −0.358                       | 33.016                   | −0.357                | 10                                | 8                                 | 108                  | 21                           | 0.38                                    | 0.05                     | 0.77                     | 0.11                    | 8.9   |
| G033.024−00.369 | 33.024                          | −0.369                       | 33.023                   | −0.370                | 20                                | 13                                | 259                  | 43                           | 1.16                                    | 0.10                     | 3.47                     | 0.31                    | 26.6  |
| G033.133−00.093 | 33.133                          | −0.093                       | 33.134                   | −0.095                | 23                                | 10                                | 246                  | 41                           | 3.78                                    | 0.31                     | 8.33                     | 0.69                    | 44.6  |
